# Supplementary material for: Trends in the utilisation of emergency departments in California, 2005–2015: a retrospective analysis
Source: PubMed Central journal article supplement — BMJ Open. 2018 Jul 23;8(7):e021392. doi: 10.1136/bmjopen-2017-021392 (PMC6059325; doi:10.1136/bmjopen-2017-021392), 2018-07-23
Supplement: bmjopen-2017-021392.draft_revisions.pdf [file bmjopen-2017-021392.draft_revisions.pdf]

# BMJ Open

BMJ Open is committed to open peer review. As part of this commitment we make the peer review history of every article we publish publicly available.

When an article is published we post the peer reviewers' comments and the authors' responses online. We also post the versions of the paper that were used during peer review. These are the versions that the peer review comments apply to.

The versions of the paper that follow are the versions that were submitted during the peer review process. They are not the versions of record or the final published versions. They should not be cited or distributed as the published version of this manuscript.

BMJ Open is an open access journal and the full, final, typeset and author-corrected version of record of the manuscript is available on our site with no access controls, subscription charges or pay-per-view fees (<http://bmjopen.bmj.com>).

If you have any questions on BMJ Open's open peer review process please email [info.bmjopen@bmj.com](mailto:info.bmjopen@bmj.com)

# BMJ Open

## Trends in the utilization of emergency departments in California, 2005-2015: a retrospective analysis

|                               |                                                                                                                                                                                                                                                                                                                                                                                                                                                                                                                                                                                                             |
|-------------------------------|-------------------------------------------------------------------------------------------------------------------------------------------------------------------------------------------------------------------------------------------------------------------------------------------------------------------------------------------------------------------------------------------------------------------------------------------------------------------------------------------------------------------------------------------------------------------------------------------------------------|
| Journal:                      | <i>BMJ Open</i>                                                                                                                                                                                                                                                                                                                                                                                                                                                                                                                                                                                             |
| Manuscript ID                 | bmjopen-2017-021392                                                                                                                                                                                                                                                                                                                                                                                                                                                                                                                                                                                         |
| Article Type:                 | Research                                                                                                                                                                                                                                                                                                                                                                                                                                                                                                                                                                                                    |
| Date Submitted by the Author: | 02-Jan-2018                                                                                                                                                                                                                                                                                                                                                                                                                                                                                                                                                                                                 |
| Complete List of Authors:     | Hsia, Renee; UCSF, Emergency Medicine; University of California, San Francisco, Philip R. Lee Institute for Health Policy Studies<br>Sabbagh, Sarah; University of California, San Francisco, Emergency Medicine<br>Guo, Joanna; University of California, San Francisco, Emergency Medicine<br>Nuckton, Thomas; Sutter Eden Medical Center, Medicine; University of California, San Francisco, Medicine<br>Niedzwiecki, Matthew; University of California at San Francisco, Department of Emergency Medicine; University of California at San Francisco, Philip R. Lee Institute for Health Policy Studies |
| Keywords:                     | emergency department, healthcare delivery, utilization                                                                                                                                                                                                                                                                                                                                                                                                                                                                                                                                                      |
|                               |                                                                                                                                                                                                                                                                                                                                                                                                                                                                                                                                                                                                             |

SCHOLARONE™  
Manuscripts

1  
2  
3 **Trends in the utilization of emergency departments in California, 2005-2015: a**  
4  
5 **retrospective analysis**  
6  
7  
8  
9

10 Renee Y. Hsia, MD, MSc<sup>1,2</sup>, Sarah H. Sabbagh, MPH<sup>1</sup>, Joanna Guo, BA,<sup>1</sup> Thomas J. Nuckton,  
11  
12 MD, MS,<sup>3,4</sup> Matthew J. Niedzwiecki, PhD<sup>1,2</sup>  
13  
14  
15

16  
17 <sup>1</sup>Department of Emergency Medicine, University of California, San Francisco, San Francisco,  
18  
19 USA  
20

21 <sup>2</sup>Philip R. Lee Institute for Health Policy Studies, University of California, San Francisco, San  
22  
23 Francisco, USA  
24

25  
26 <sup>3</sup>Department of Medicine, Sutter Eden Medical Center, San Francisco, USA  
27

28 <sup>4</sup>Department of Medicine, University of California, San Francisco, San Francisco, USA  
29  
30  
31  
32

33 **Corresponding author:**

34 Renee Y. Hsia, MD, MSc  
35 Department of Emergency Medicine  
36 University of California, San Francisco  
37 1001 Potrero Ave, 1E21, San Francisco General Hospital  
38 San Francisco, CA 94110  
39 Tel: (415) 206-4612  
40 Fax: (415) 206-5818  
41 Email: [renee.hsia@emergency.ucsf.edu](mailto:renee.hsia@emergency.ucsf.edu)  
42  
43  
44  
45  
46  
47

48 **Word Count:** 3,226  
49  
50  
51  
52  
53  
54  
55  
56  
57  
58  
59  
60

## ABSTRACT

**Objectives:** To examine current trends and characteristics of patients visiting the ED in order to identify changes in the patient population and detect potential unmet needs in the healthcare system.

**Design:** A retrospective study.

**Setting:** We analyzed ED utilization trends between 2005-2015 in California using non-public patient data from California's Office of Statewide Health Planning and Development.

**Participants:** We included all ED visits in California from 2005 to 2015.

**Primary and Secondary Outcome Measures:** We analyzed ED visits and visit rates by age, sex, race/ethnicity, payer, and urban/rural trends. We further examined age, sex, race/ethnicity, and urban/rural trends within each payer group for a more granular picture of the patient population. Additionally, we looked at proportion of patients admitted from the ED and distribution of diagnoses.

**Results:** Between 2005-2015, the number of ED visits increased from 10.2 to 14.2 million in California. ED visit rates increased by 27.8% ( $p<0.001$ ), with the greatest increases among patients aged 5-19 (37.4%,  $p<0.001$ ) and 45-64 years (41.1%,  $p<0.001$ ), non-Hispanic black and Hispanic patients (56.8% and 48.8%,  $p<0.001$ ), the uninsured and Medicaid-insured (36.1%,  $p=0.002$ ; 28.6%,  $p<0.001$ ), and urban residents (28.3%,  $p<0.001$ ). The proportion of ED visits resulting in hospitalization decreased by 18.3%, with decreases across all payer groups.

**Conclusions:** Our findings reveal considerable unmet healthcare needs and suggest that policies or programs aimed at increasing regular healthcare access among specific patient groups may have the potential to lessen demands on EDs and improve overall healthcare delivery.

**Keywords:** emergency department; utilization; demand; healthcare delivery

### STRENGTHS AND LIMITATIONS OF THIS STUDY

- To our knowledge, this is the first study that has granularly examined patient characteristics and ED use trends longitudinally using a statewide sample size.
- California's initiatives to increase Medicaid enrollment through the ACA and Low Income Health Programs (LIHP) provide a unique opportunity to study how patient characteristics and healthcare needs have changed over time under continual and gradual efforts to increase healthcare access.
- Our data are limited to California residents, potentially limiting the generalizability of our results despite California's diverse population.
- ED visit rates may be overestimated due to the fact that some populations who visit the ED frequently – including patients who are undocumented and homeless, or live in nursing homes, extended-care facilities, prisons, and mental health facilities – are not accounted for in the population denominator.

## INTRODUCTION

Emergency departments (EDs) are an integral component of the United States (US) health care system, as they provide the only around-the-clock health care to all, regardless of a patient's ability to pay.[1-4] In the past two decades, the annual number of ED visits in the US has increased by 50%, while the number of EDs has decreased by 11%,[5] raising concerns about the ability of EDs to provide accessible care amidst the rise in demand for emergency care services. Appropriate allocation of resources to meet such demands may require greater focus on ED utilization trends, which reflect the changing patterns of patient healthcare needs and reveal possible factors – including patient conditions, healthcare reform, or insurance coverage changes – that may contribute to the increase in demand for emergency care.[6, 7]

Despite outpatient and primary care expansions and increased strategies aimed at reducing emergency care demand,[8-14] ED visits have continued to rise, with greater reliance on EDs to satisfy unmet needs and provide care unavailable in other parts of the healthcare system.[15] Previous literature suggest that older patients, minorities, lower-income patients, and Medicaid beneficiaries are more likely to use the ED,[16-18] and recent reports have continued to show substantial increases in ED utilization, especially among Medicaid-insured patients.[19-21] However, to our knowledge, no other studies in recent years have granularly examined patient characteristics and trends longitudinally – most studies are either focused on short-term study periods using limited sample sizes to evaluate the impact of the Affordable Care Act (ACA) or do not use appropriate measures to evaluate ED utilization relative to population changes.[22-25]

State-level examinations of the association between health insurance and ED use – particularly in the context of ACA reforms – have yielded complex and often conflicting results.[26] Although evaluating the impact of the ACA on healthcare utilization and outcomes

1  
2  
3 remains an important task, studies suggest that a more comprehensive assessment of how patient  
4  
5 characteristics and healthcare needs have changed may help better design the necessary policies  
6  
7 and programs to meet patients' healthcare needs. California's large and diverse population, as  
8  
9 well as its initiatives to increase Medicaid enrollment through the ACA and Low Income Health  
10  
11 Programs (LIHP) provide a unique opportunity to study how patient characteristics and  
12  
13 healthcare needs have changed over time under continual and gradual efforts to increase  
14  
15 healthcare access. Thus, we sought to examine state-level trends in emergency care demand from  
16  
17 2005 to 2015 in California. Using state-level data, we analyzed patient age, sex, race/ethnicity,  
18  
19 insurance status, and region of care to examine where emergency care demands are most critical  
20  
21 and where future resources may be directed to improve care and lessen ED utilization.  
22  
23  
24  
25  
26  
27

## 28 **METHODS**

### 29 **Study Design and Data Sources**

30  
31  
32 We obtained 2005-2015 non-pubic Patient Discharge Data (PDD), Emergency  
33  
34 Department Discharge Data (EDD), Hospital Annual Financial Data, and Hospital Annual  
35  
36 Utilization Data from California's Office of Statewide Health Planning and Development  
37  
38 (OSHPD), which conducts annual, standardized surveys required of all hospitals and health  
39  
40 service facilities in California.[27, 28] To account for changes in California's population over  
41  
42 time, we calculated annual ED utilization rates by age, sex, race/ethnicity, insurance payer, and  
43  
44 urban/rural residence. We used annual age and sex population estimates provided by the US  
45  
46 Census Bureau;[29, 30] state population insurance coverage estimates from the Current  
47  
48 Population Survey's Annual Social and Economic Supplements (for the years 2005-2012) and  
49  
50 American Community Survey (for the years 2013-2015);[31, 32] and race/ethnicity population  
51  
52  
53  
54  
55  
56  
57  
58  
59  
60

1  
2  
3 estimates from the California Department of Finance (for the years 2005-2009) and the US  
4  
5 Census Bureau (for the years 2010-2015).[33, 34]  
6  
7  
8  
9

### 10 **Inclusion Criteria and Variable Definition**

11  
12 We included all ED visits in California from 2005 to 2015, and classified ED visits as  
13  
14 inpatient if the visit resulted in a hospital admission and outpatient if the visit resulted in  
15  
16 treatment-and-release without admission. We designated hospitals as urban or rural based on the  
17  
18 corresponding county listed in the non-public PDD documentation.  
19  
20  
21  
22

### 23 **Statistical Analysis**

24  
25 We analyzed ED visits and visit rates for significant trends in California from 2005 to  
26  
27 2015 by age group (<5 years, 5-19 years, 20-64 years, and 65 years and over); sex (male, female,  
28  
29 unknown); race/ethnicity group (non-Hispanic white, non-Hispanic black, Hispanic, Other);  
30  
31 payer/insurance status (private, Medicare, Medicaid, uninsured/self-pay, other, unknown); and  
32  
33 metropolitan statistical area (rural or urban). Furthermore, we looked at age, sex, race/ethnicity,  
34  
35 urban/rural trends by payer for a more granular picture of patient population differences within  
36  
37 each insurance group. We obtained International Classification of Disease, 9<sup>th</sup> Revision, Clinical  
38  
39 Modification (ICD-9-CM) codes for principal hospital discharge diagnoses, and categorized  
40  
41 them into multi-level diagnoses codes using the Agency for Healthcare Research and Quality's  
42  
43 Clinical Classification Software (CCS) to examine changes in conditions observed in the ED  
44  
45 over time. We performed all analyses using Stata software (version 14, Stata Corporation,  
46  
47 College Station, TX). The University of California, San Francisco Institutional Review Board  
48  
49 deemed this study exempt from human subjects review.  
50  
51  
52  
53  
54  
55  
56  
57  
58  
59  
60



## RESULTS

Between 2005 and 2015, total annual ED visits in California increased by 39.7% ( $p<0.001$ ), from 10.2 million to 14.2 million (Table 1). ED utilization in California gradually increased across most years in the study period, with two pronounced jumps from 2008 to 2009 (8.1%) and 2014 to 2015 (6.3%). The number of ED visits grew the most among patients aged 45-64 (55.8%;  $p<0.001$ ), female patients (42.5%;  $p<0.001$ ), Hispanic patients (78.4%;  $p<0.001$ ), Medicaid beneficiaries (151.0%;  $p=0.001$ ), and those living in urban areas (40.5%;  $p<0.001$ ).

After adjusting for the 9.3% population growth in California during our study period, we found an overall 27.8% ( $p<0.001$ ) increase in ED visit rates between 2005 and 2015 (Table 2), with significant increases among all patient characteristics examined. In 2015, ED visit rates were the highest among patients aged less than 5 and 65 and over (543 visits and 503 visits per 1,000 California residents aged less than 5 and 65 and over, respectively), non-Hispanic black patients (703 per 1,000), Medicaid-insured patients (747 per 1,000), and rural residents (501 per 1,000). ED visit rates grew the fastest among patients aged 5-19 and 45-64 (37.4% increase, from 196 to 270 per 1,000; and 41.1% increase, from 101 to 142 per 1,000 – in particular, a 232% increase among Medicaid-insured 45-64-year-olds – see Appendix;  $p<0.001$  for both), uninsured patients (36.1% increase, from 242 to 330 per 1,000;  $p=0.002$ ), and urban residents (28.3% increase, from 281 to 361 per 1,000;  $p<0.001$ ). Although non-Hispanic black patients had a strikingly higher ED visit rate in 2015, both non-Hispanic black and Hispanic patients experienced similar high levels of ED visit rate growth (56.8% increase, from 448 to 703 per 1,000; and 48.8% increase, from 237 to 353 per 1,000;  $p<0.001$  for both) during the study period.

When examining ED discharge and hospital admission trends, the number of ED visits resulting in a discharge (“treat-and-release”) increased by 44.5%, from roughly 8.6 to 12.4

1  
2  
3 million, and the number resulting in a hospital admission increased by 14.2%, from roughly 1.6  
4  
5 million to 1.9 million during the study period. The proportion of ED visits that resulted in a  
6  
7 discharge increased by 3.5% from 84.0% of ED visits in 2005 to 86.9% in 2015, while the  
8  
9 proportion that resulted in a hospital admission decreased by 18.3% from 16.0% of ED visits in  
10  
11 2005 to 13.1% in 2015 (Figure 1).  
12  
13

### 14 15 16 **ED Visit Patient Composition Trends by Payer**

17  
18  
19 Although ED visit rates increased across all payer groups, the proportion of ED visits  
20  
21 from private and uninsured patients decreased by 24.0% (from 35.0% to 26.6%) and 50.1%  
22  
23 (from 15.4% to 7.7%), respectively, while the proportion of ED visits from Medicare- and  
24  
25 Medicaid-insured patients increased by 13.1% (from 18.7% to 21.1%) and 79.7% (from 22.9% to  
26  
27 41.1%), respectively, during the study period (Figure 2).  
28  
29

30  
31 We further examined payer composition trends by looking at ED visits resulting in a  
32  
33 hospital admission. The number of ED visits resulting in hospitalization grew for Medicaid-  
34  
35 (72.0%) and Medicare-insured (18.5%) patients but declined for privately insured (-8.3%) and  
36  
37 uninsured (-71.3%) patients. However, we found that the proportion of all ED visits resulting in  
38  
39 hospitalization reduced across all payer groups, with decreases of 13.6% for the privately  
40  
41 insured, 31.4% for the Medicaid-insured, 25.0% for the Medicare-insured, and 58.8% for the  
42  
43 uninsured.  
44  
45  
46  
47  
48

### 49 **ED Visit Trends by CCS Diagnoses**

50  
51 When we analyzed ED visits by multi-level CCS diagnosis groups, we found that the  
52  
53 number of ED visits increased across all CSS diagnoses except for the unclassified conditions  
54  
55 group (Figure 3). The top 5 conditions for which ED visits grew the most included infectious and  
56  
57  
58  
59  
60

1  
2  
3 parasitic diseases (88.2%), diseases of the blood and blood-forming organs (78.7%), mental  
4  
5 illness (70.8%), diseases of the musculoskeletal system (64.2%), and diseases of the  
6  
7 genitourinary system (60.7%). However, the top 5 most prevalent conditions during the study  
8  
9 period were injury and poisoning (20.8%), diseases of the respiratory system (12.8%), ill-defined  
10  
11 conditions (12.5%), diseases of the nervous system (8.8%), and diseases of the circulatory  
12  
13 system (8.3%).  
14  
15  
16  
17  
18

## 19 **DISCUSSION**

20  
21 Between 2005 and 2015, ED visit rates increased by 27.8% in California, with the  
22  
23 greatest ED visit rate growth among patients aged 5-19 and 45-64 years old, uninsured and  
24  
25 Medicaid-insured patients, non-Hispanic black and Hispanic patients, and patients living in  
26  
27 urban areas. Despite relatively slower ED visit rate growth trends, the youngest (less than 5  
28  
29 years) and elderly (65 and over) patient cohorts and Medicare-insured patients retained high ED  
30  
31 visit rates throughout the study period. Our findings are consistent with prior studies, which have  
32  
33 shown high ED utilization by Medicaid-insured, urban-residing, and elderly patients.[14, 17, 18,  
34  
35 35-38] Our findings follow the same increasing trends found in previous investigations of ED  
36  
37 utilization trends in California, especially among Medicaid-insured patients;[21, 25] however,  
38  
39 our study purposefully includes granular age groups, sex, race/ethnicity, and urban/rural status in  
40  
41 addition to payer groups, and employs demographic-specific population measures in order to  
42  
43 provide a comprehensive picture of how ED patient demographics have changed relative to the  
44  
45 population over the past decade. Compared to ED visit trends in the United States, California  
46  
47 experienced a much higher increase in ED visits (31.5% vs. 14.8%) from 2006-2014, but still  
48  
49 retained a much lower ED visit rate in 2014 (345 vs 432 per 1,000).[19] California is especially  
50  
51 unique in that it is among one of the highest Medicaid-insured states in the country, and has  
52  
53  
54  
55  
56  
57  
58  
59  
60

1  
2  
3 taken initiatives to increase healthcare access through the ACA and LIHP. Our study provides an  
4  
5 opportunity to see how insurance-based initiatives can provide insight into current gaps in the  
6  
7 healthcare system and the population's changing healthcare needs.  
8

9  
10 We observed increasing trends in ED visits among patients aged 45-64, who had the  
11  
12 greatest ED utilization rate increase, but the lowest overall ED visit rate, which suggests that  
13  
14 patients nearing 65 may have increasingly higher health care needs. Our findings of a 232%  
15  
16 increase in absolute visits from Medicaid suggests that individuals who have not yet "aged-in" to  
17  
18 Medicare and do not have the means to pay for private insurance may have significant health  
19  
20 care needs. There has been evidence of sharp increases in healthcare utilization once patients  
21  
22 turn 65 years old,[39] which highlights the tendency for elderly healthcare needs to arise before  
23  
24 age 65, and the delayed care resulting from Medicare's age limit. Moreover, given the healthcare  
25  
26 needs of patients nearing 65 years old, and Medicare and Medicaid's different purposes and  
27  
28 restrictions, shifting the cost of care from Medicaid to Medicare may allow for patients to receive  
29  
30 the appropriate treatment, since care received is often influenced by insurance, which could  
31  
32 improve overall health outcomes.  
33  
34  
35  
36

37  
38 Although patients aged 45-64 had the greatest ED visit rate growth, patients aged less  
39  
40 than 5 had the highest ED utilization rate as of 2015, outpacing the ED utilization rate for  
41  
42 patients 65 and over. This finding, along with the high ED visit rate growth for patients aged 5-  
43  
44 19, suggests increasing need for pediatric emergency care. Higher ED utilization by pediatric  
45  
46 patients incite the need to re-examine current trends in the availability of EDs equipped to treat  
47  
48 children and reorganize ED care to better treat this population. Our finding of high ED utilization  
49  
50 rates by pediatric patients could also point to potential barriers in obtaining regular care, which is  
51  
52 often difficult for publicly-insured and uninsured patients. Underinsured patients have been  
53  
54  
55  
56  
57  
58  
59  
60

1  
2  
3 shown to have high ED utilization,[40] and policies aimed at creating more accessible care for  
4  
5 underinsured pediatric patients may lessen the demands on EDs.  
6

7  
8         Meanwhile, patients aged 65 and over retained high steady ED visit rates, which is  
9  
10 expected given their high and complex healthcare needs.[37, 38, 41, 42] A portion of these visits,  
11  
12 for example, may be a result of providers who refer patients to the ED to receive more advanced  
13  
14 acute care not necessarily available in other parts of the health care system,[4, 43] increasing the  
15  
16 number of elderly patients with inpatient hospital visits originating from the ED. The consistent  
17  
18 high ED utilization trends and current trends in physician referral practices point to a need for  
19  
20 improving geriatric care at a systematic level to treat elderly patients effectively and in a timely  
21  
22 manner. Previously reported improvements in access to primary care and decreases in delays for  
23  
24 seeking outpatient care may partially explain the trends in ED visit rates by Medicare-insured  
25  
26 patients,[44] where we observed an overall slow increase in ED visit rates from 2005 to 2015,  
27  
28 with slight decreases between 2012 and 2014. Improvements in services available to Medicare  
29  
30 patients, including preventative screening and chronic disease management, could have offset  
31  
32 some of the demand for ED care among this patient demographic.[17] Although early data  
33  
34 suggest that recent Medicare reforms[45, 46] have led to decreases in health care spending[47,  
35  
36 48] and improvements in patients' experience in timely access to non-urgent care,[49] further  
37  
38 research may be necessary to determine if primary care access has been truly improved for  
39  
40 Medicare-insured patients and whether such improvements can decrease ED utilization overtime.  
41  
42  
43  
44  
45

46  
47         Current trends show increasingly higher ED visit rates for non-Hispanic black and  
48  
49 Hispanic patients, which likely ties in with our findings of increased ED visit rates in urban areas  
50  
51 and among uninsured and Medicaid-insured patients as non-Hispanic black and Hispanic  
52  
53 populations tend to reside in urban areas and have high rates of Medicaid insurance and un-  
54  
55 insurance.[50, 51] Although we found similar ED visit rates between non-Hispanic white and  
56  
57  
58  
59

1  
2  
3 Hispanic patients, it is possible that the observed number of ED visits by Hispanic patients is  
4  
5 overall lower because this demographic may be more likely to avoid visiting the ED for reasons  
6  
7 such as language barriers, fear of deportation, and other cultural factors.[52, 53] These trends  
8  
9 illustrate substantial gaps in the healthcare system overall, as many patients may have previously  
10  
11 avoided seeking care due to lack of health insurance, and suggest that although healthcare access  
12  
13 has increased to some extent, disparities still exist,[54] and unmet healthcare needs persist as  
14  
15 EDs, acting as “safety nets,” continue to provide increasingly more care.  
16  
17

18  
19 Prior studies have reported high ED utilization rates among Medicaid-insured and  
20  
21 uninsured patients,[14, 17, 18, 35, 36] consistent with our findings of large ED visit rate  
22  
23 increases by these payer groups. Our findings could reflect a number of trends. First, the use of  
24  
25 EDs as “safety nets” has been previously reported,[17, 55] with one study reporting that more  
26  
27 than 50% of all acute visits by uninsured patients were sent to emergency physicians, who  
28  
29 comprise less than 5% of all physicians in the US[56, 57] Second, difficulty in accessing primary  
30  
31 care has been widely cited as a potential source for the increasing trends of ED use by Medicaid-  
32  
33 insured patients.[9, 17, 35] Despite initiatives such as the ACA designed to provide low-income  
34  
35 individuals with health care access, Medicaid-insured patients increasingly seek care in the ED  
36  
37 as a result of untimely access to primary and specialty care,[15] which largely has been attributed  
38  
39 to the reluctance of many primary care providers to accept Medicaid insurance due to low  
40  
41 reimbursement rates.[9, 58-60] At the same time, however, increasing literature shows that even  
42  
43 patients with adequate primary care access are often referred to the ED by their primary care  
44  
45 physicians,[24] suggesting that physicians themselves are also relying on the emergency care  
46  
47 system to help diagnose and manage patients. Last, the utilization of EDs over other ambulatory  
48  
49 care venues by patients of low socioeconomic status is influenced not only by insurance status or  
50  
51 affordability, but also by accessibility, availability, perceptions of accommodation, and high  
52  
53  
54  
55  
56  
57  
58  
59  
60

1  
2  
3 disease burden.[61, 62] These factors are important to consider when exploring potential  
4  
5 solutions to improve the accessibility, provision, and quality of care.  
6

7  
8 Despite increasing numbers of ED visits, the proportion of ED visits resulting in inpatient  
9  
10 admissions decreased. Prior studies have indicated that high numbers of complex and urgent  
11  
12 patients are being managed in EDs,[63-65] and the decreases in the proportion of admissions  
13  
14 seen in our study could indicate that patients with complex conditions are being evaluated,  
15  
16 treated, and discharged from the ED rather than being admitted or cared for elsewhere. Although  
17  
18 this has potential benefits to healthcare systems, management of high-acuity outpatients in the  
19  
20 ED could further contribute to the demands on EDs.  
21  
22

23  
24 Other changes in ED visit trends included decreases in the proportion of ED visits for  
25  
26 conditions related to poisoning/injury, and increases in medical conditions, including  
27  
28 infectious/parasitic diseases and mental illness. Consistent with prior literature noting a decrease  
29  
30 in ED visit rates for injuries in California from 2005-2011, but an increase for non-injury  
31  
32 diagnoses,[66] our findings reveal the changing role of the ED in the health care system, where  
33  
34 EDs are treating and providing care for more complex medical conditions. The rise in ED visits  
35  
36 for such conditions suggests a need to shift resources to provide care that individuals seeking  
37  
38 care in the ED might have trouble finding in other parts of the healthcare system. For example,  
39  
40 increasing resources such as mental health professionals and psychiatric inpatient beds may be  
41  
42 one solution to reduce the burden of mental health visits on EDs. As chronic illnesses increase in  
43  
44 the US[67] and the management of these conditions becomes more complex, it becomes  
45  
46 increasingly important to expand services and access to treatments for conditions that drive ED  
47  
48 utilization and demand for emergency care.  
49  
50  
51  
52  
53  
54  
55  
56  
57  
58  
59  
60

## Limitations

Our study includes several limitations. First, OSHPD collects self-reported data from hospitals, which could introduce potential reporting errors or missing data; however, hospitals submit routine accuracy checks which reduce such errors. Second, our data are limited to California residents and may limit the generalizability of our results despite California's diverse population. Third, US Census Bureau surveys exclude undocumented and homeless populations, as well as individuals residing in nursing homes, extended-care facilities, prisons, and mental health facilities. Many of these individuals visit the ED on a frequent basis, and thus ED visit rates could be overestimated because many of these people are not accounted for in the population denominator.

## CONCLUSIONS

Our findings suggest that trends in the demand for emergency care continue to rise and remain at critical levels. ED visit rates in California increased from 2005-2015, across all age groups, and particularly among the uninsured, Medicaid-insured, non-Hispanic black, Hispanic, and urban-residing patients. Increased ED visit rates by Medicaid-insured and uninsured patients may reflect previously and persisting unmet healthcare needs and current limitations in access to care in other parts of the healthcare system. Furthermore, changes in conditions seen in the ED suggest that patient healthcare needs are becoming increasingly great and complex. Rather than focusing solely on efforts to reduce ED use, policymakers may need to recognize that EDs are playing an increasingly vital role in the provision of care and consider ways to incorporate this changing reality into the delivery of health services.



## **AUTHORS' CONTRIBUTIONS**

RYH and MJN contributed to the conception and design of the study. SS and TJN drafted the manuscript. MJN and JG contributed to the analysis of data. RYH provided supervision. RYH, SS, JG, TJN, and MJN contributed to the interpretation of the data and critically reviewed, revised, and approved the manuscript.

## **ACKNOWLEDGMENTS**

The authors thank the California Office of Statewide Health Planning and Development for their assistance in preparing the datasets used in this project.

## **FUNDING STATEMENT**

This work was supported by the California Health Care Foundation. The sponsors had no role in the design and conduct of the study; collection, management, analysis, and interpretation of the data; preparation, review, or approval of the manuscript; and decision to submit the manuscript for publication.

## **COMPETING INTERESTS STATEMENT**

None declared.

## **ETHICAL APPROVAL**

The University of California, San Francisco Committee on Human Research approved this study.

## **PATIENT CONSENT**

1  
2  
3 Not applicable.  
4  
5  
6

7  
8 **DATA SHARING STATEMENT**  
9

10 The data are available through the California Office of Statewide Health Planning and  
11  
12 Development.  
13  
14  
15  
16  
17  
18  
19  
20  
21  
22  
23  
24  
25  
26  
27  
28  
29  
30  
31  
32  
33  
34  
35  
36  
37  
38  
39  
40  
41  
42  
43  
44  
45  
46  
47  
48  
49  
50  
51  
52  
53  
54  
55  
56  
57  
58  
59  
60

For peer review only

**REFERENCES**

1. EMTALA. Emergency Medical Treatment and Active Labor Act of 1985. Pub L No. 99-272, 42 USC §1395dd 1986.
2. Cetta MG, Asplin BR, Fields WW, et al. Emergency medicine and the debate over the uninsured: a report from the task force on health care and the uninsured. *Ann Emerg Med* 2000;36:243-6.
3. Fields WW, Asplin BR, Larkin GL, et al. The Emergency Medical Treatment and Labor Act as a federal health care safety net program. *Acad Emerg Med* 2001;8:1064-9.
4. Schuur JD, Venkatesh AK. The growing role of emergency departments in hospital admissions. *N Engl J Med* 2012;367:391-3.
5. American Hospital Association. Trendwatch chartbook 2016: trends affecting hospitals and health systems. Table 3.3: emergency department visits, emergency department visits per 1,000 persons, and number of emergency departments, 1994-2014. 2016. <http://www.aha.org/research/reports/tw/chartbook/2016/2016chartbook.pdf> (accessed 06 Dec 2017).
6. Skinner HG, Blanchard J, Elixhauser A. Trends in emergency department visits, 2006-2011. HCUP Statistical Brief #179. Rockville, MD: Agency for Healthcare Research and Quality; 2014. <https://www.hcup-us.ahrq.gov/reports/statbriefs/sb179-Emergency-Department-Trends.pdf> (accessed 06 Dec 2017).
7. Emergency Physicians: Anthem Blue Cross Blue Shield Policy Violates Federal Law [press release]. Washington: PRNewswire-USNewswire, 16 May 2017. <http://newsroom.acep.org/2017-05-16-Emergency-Physicians-Anthem-Blue-Cross-Blue-Shield-Policy-Violates-Federal-Law> (accessed 06 Dec 2017).

- 1  
2  
3 8. Adams JG. Emergency department overuse: perceptions and solutions. *JAMA*  
4  
5 2013;309:1173-4.  
6
- 7  
8 9. Kellermann AL, Weinick RM. Emergency departments, Medicaid costs, and access to  
9  
10 primary care — understanding the link. *N Engl J Med* 2012;366:2141-3.  
11
- 12  
13 10. Friedman AB, Saloner B, Hsia RY. No place to call home - policies to reduce ED use in  
14  
15 Medicaid. *N Engl J Med* 2015;372:2382-5.  
16
- 17  
18 11. Flores-Mateo G, Violan-Fors C, Carrillo-Santistevé P, et al. Effectiveness of  
19  
20 organizational interventions to reduce emergency department utilization: a systematic review.  
21  
22 *PLoS One* 2012;7:e35903.  
23
- 24  
25 12. DeSalvo KB, Kertesz S. Creating a more resilient safety net for persons with chronic  
26  
27 disease: beyond the “medical home”. *J Gen Intern Med* 2007;22:1377-9.  
28
- 29  
30 13. Reid RJ, Johnson EA, Hsu C, et al. Spreading a medical home redesign: effects on  
31  
32 emergency department use and hospital admissions. *Ann Fam Med* 2013;11:S19-S26.  
33
- 34  
35 14. Taubman SL, Allen HL, Wright BJ, et al. Medicaid increases emergency-department use:  
36  
37 evidence from Oregon's health insurance experiment. *Science* 2014;343:263-8.  
38
- 39  
40 15. American College of Emergency Physicians. ER visits continue to rise since  
41  
42 implementation of Affordable Care Act. 04 May 2015. [http://newsroom.acep.org/2015-05-04-  
43  
44 ER-Visits-Continue-to-Rise-Since-Implementation-of-Affordable-Care-Act](http://newsroom.acep.org/2015-05-04-ER-Visits-Continue-to-Rise-Since-Implementation-of-Affordable-Care-Act) (accessed 06 Dec  
45  
46 2017).  
47
- 48  
49 16. Garcia TC, Bernstein AB, Bush MA. Emergency department visitors and visits: who used  
50  
51 the emergency room in 2007? NCHS Data Brief, No. 38. Hyattsville, MD: National Center for  
52  
53 Health Statistics; 2010. <https://www.cdc.gov/nchs/data/databriefs/db38.pdf> (accessed 06 Dec  
54  
55 2017).  
56  
57  
58  
59  
60

- 1  
2  
3 17. Tang N, Stein J, Hsia RY, et al. Trends and characteristics of US emergency department  
4 visits, 1997-2007. *JAMA* 2010;304:664-70.  
5  
6  
7  
8 18. McConville S, Lee H. Emergency department care in California: who uses it and why?  
9  
10 San Francisco, CA: The Public Policy Institute of California 10(1); 2008.  
11  
12 <http://www.ppic.org/publication/emergency-department-care-in-california-who-uses-it-and-why/>  
13  
14 (accessed 06 Dec 2017).  
15  
16  
17 19. Moore BJ, Stocks C, Owens PL. Trends in Emergency Department Visits, 2006-2014.  
18  
19 HCUP Statistical Brief #227. Rockville, MD: Agency for Healthcare Research and Quality;  
20  
21 2017. [https://www.hcup-us.ahrq.gov/reports/statbriefs/sb227-Emergency-Department-Visit-](https://www.hcup-us.ahrq.gov/reports/statbriefs/sb227-Emergency-Department-Visit-Trends.pdf)  
22  
23 [Trends.pdf](https://www.hcup-us.ahrq.gov/reports/statbriefs/sb227-Emergency-Department-Visit-Trends.pdf) (accessed 06 Dec 2017).  
24  
25  
26 20. HCUP Fast Stats, Healthcare Cost and Utilization Project. California: All ED Visits  
27  
28 (Adults and Pediatric) by Expected Payer. Rockville, MD: Agency for Healthcare Research and  
29  
30 Quality; 2017. <https://www.hcup-us.ahrq.gov/faststats/StatePayerEDServlet?state1=CA>  
31  
32 (accessed 06 Dec 2017).  
33  
34  
35 21. Office of Statewide Health Planning and Development. Emergency Department  
36  
37 Encounters by Expected Payer (2012 to 2016). 2017.  
38  
39 [https://www.oshpd.ca.gov/documents/PressReleases/2017/ED-Encounters-by-Expected-Payer-](https://www.oshpd.ca.gov/documents/PressReleases/2017/ED-Encounters-by-Expected-Payer-2012-2016.pdf)  
40  
41 [2012-2016.pdf](https://www.oshpd.ca.gov/documents/PressReleases/2017/ED-Encounters-by-Expected-Payer-2012-2016.pdf) (accessed 06 Dec 2017).  
42  
43  
44 22. Garthwaite C, Gross T, Notowidigdo M, et al. Insurance Expansion and Hospital  
45  
46 Emergency Department Access: Evidence From the Affordable Care Act. *Ann Intern Med*  
47  
48 2017;166:172-9.  
49  
50  
51  
52  
53  
54  
55  
56  
57  
58  
59  
60

- 1  
2  
3 23. Sommers BD, Blendon RJ, Orav EJ, et al. Changes in Utilization and Health Among  
4 Low-Income Adults After Medicaid Expansion or Expanded Private Insurance. *JAMA Intern*  
5  
6 *Med* 2016;176:1501-9.  
7  
8  
9  
10 24. Finkelstein AN, Taubman SL, Allen HL, et al. Effect of Medicaid coverage on ED use —  
11 further evidence from Oregon’s experiment. *New Engl J Med* 2016;375:1505-7.  
12  
13  
14 25. Barakat MT, Mithal A, Huang RJ, et al. Affordable Care Act and healthcare delivery: A  
15 comparison of California and Florida hospitals and emergency departments. *PLoS One*  
16  
17 2017;12:e0182346.  
18  
19  
20 26. Sommers BD, Simon K. Health Insurance and Emergency Department Use - A Complex  
21 Relationship. *N Engl J Med* 2017;376:1708-11.  
22  
23  
24 27. Hospital Annual Financial Data 2005-2015. California Office of Statewide Health  
25 Planning and Development. 2016.  
26  
27 [http://www.oshpd.ca.gov/hid/Products/Hospitals/AnnFinanData/SubSets/SelectedData/default.as](http://www.oshpd.ca.gov/hid/Products/Hospitals/AnnFinanData/SubSets/SelectedData/default.asp)  
28  
29 [p](http://www.oshpd.ca.gov/hid/Products/Hospitals/AnnFinanData/SubSets/SelectedData/default.asp). (accessed 01 Sept 2016).  
30  
31  
32  
33 28. Hospital Annual Utilization Data 2005-2015. California Office of Statewide Health  
34 Planning and Development. 2016. <https://www.oshpd.ca.gov/HID/Hospital-Utilization.html>.  
35  
36 (accessed 01 Sept 2016).  
37  
38  
39 29. Table 2. Intercensal Estimates of the Resident Population by Sex and Age for California:  
40 April 1, 2000 to July 1, 2010. U.S. Census Bureau, Population Division. 2012.  
41  
42 <https://www.census.gov/data/tables/time-series/demo/popest/intercensal-2000-2010-state.html>  
43  
44 (accessed 06 Dec 2017).  
45  
46  
47  
48  
49 30. Annual Estimates of the Resident Population for Selected Age Groups by Sex for the  
50 United States, States, Counties and Puerto Rico Commonwealth and Municipios: April 1, 2010  
51  
52  
53  
54  
55  
56  
57  
58  
59  
60

1  
2  
3 to July 1, 2015. U.S. Census Bureau, Population Division. 2016.

4  
5 <https://factfinder.census.gov/faces/tableservices/jsf/pages/productview.xhtml?src=bkmk>

6  
7  
8 (accessed 06 Dec 2017).

9  
10 31. Health Insurance Coverage Status and Type of Coverage by State and Age for All

11  
12 People: 2005-2011. Current Population Survey, 2006-2012 Annual Social and Economic

13  
14 Supplement. U.S. Census Bureau. [https://www.census.gov/data/tables/time-series/demo/income-](https://www.census.gov/data/tables/time-series/demo/income-poverty/cps-hi.html)

15  
16  
17 [poverty/cps-hi.html](https://www.census.gov/data/tables/time-series/demo/income-poverty/cps-hi.html) (accessed 06 Dec 2017).

18  
19 32. Health Insurance Coverage Status and Type of Coverage by State and Age for All

20  
21 People: 2013-2015. American Community Survey, 2013-2015. U.S. Census.

22  
23  
24 <https://www.census.gov/data/tables/time-series/demo/health-insurance/acs-hi.html> (accessed 06

25  
26  
27 Dec 2017).

28  
29 33. Race/Ethnic Population with Age and Sex Detail, 2000-2010. State of California,

30  
31 Department of Finance. 2012.

32  
33  
34 <http://www.dof.ca.gov/Forecasting/Demographics/Estimates/Race-Ethnic/2000-2010/> (accessed

35  
36  
37 06 Dec 2017).

38  
39 34. Annual Estimates of the Resident Population by Sex, Age, Race, and Hispanic Origin for

40  
41 the United States and States: April 1, 2010 to July 1, 2015. U.S. Census Bureau, Population

42  
43 Division. 2016.

44  
45 <https://factfinder.census.gov/faces/tableservices/jsf/pages/productview.xhtml?src=bkmk>

46  
47  
48 (accessed 06 Dec 2017).

49  
50 35. Hsia RY, Brownell J, Wilson S, et al. Trends in adult emergency department visits in

51  
52 California by insurance status, 2005-2010. *JAMA* 2013;310:1181-3.

- 1  
2  
3 36. Cheung PT, Wiler JL, Lowe RA, et al. National study of barriers to timely primary care  
4 and emergency department utilization among Medicaid beneficiaries. *Ann Emerg Med*  
5  
6 2012;60:4-10.e2.  
7  
8  
9  
10 37. Greenwald PW, Stern ME, Rosen T, et al. Trends in short-stay hospitalizations for older  
11 adults from 1990 to 2010: implications for geriatric emergency care. *Am J Emerg Med*  
12  
13 2014;32:311-4.  
14  
15  
16 38. Pines JM, Mullins PM, Cooper JK, et al. National trends in emergency department use,  
17 care patterns, and quality of care of older adults in the United States. *J Am Geriatr Soc*  
18  
19 2013;61:12-7.  
20  
21  
22 39. Card D, Dobkin C, Maestas N. The Impact of Nearly Universal Insurance Coverage on  
23 Health Care Utilization: Evidence from Medicare. *Am Econ Rev* 2008;98:2242-58.  
24  
25  
26 40. Hsia RY, Brownell J, Baker LC. Emergency department visits by children, adolescents,  
27 and young adults in California by insurance status, 2005-2010. *JAMA* 2014;312:1587-8.  
28  
29  
30 41. Samaras N, Chevalley T, Samaras D, et al. Older patients in the emergency department: a  
31 review. *Ann Emerg Med* 2010;56:261-9.  
32  
33  
34 42. Gray LC, Peel NM, Costa AP, et al. Profiles of older patients in the emergency  
35 department: findings from the interRAI multinational emergency department study. *Ann Emerg*  
36  
37  
38  
39  
40  
41  
42  
43  
44 43. Greenwald PW, Estevez RM, Clark S, et al. The ED as the primary source of hospital  
45 admission for older (but not younger) adults. *Am J Emerg Med* 2016;34:943-7.  
46  
47  
48 44. Leatherman S, McCarthy D. Quality of health care in the United States: a chartbook.  
49 New York, NY: The Commonwealth Fund; 2002.  
50  
51  
52  
53  
54  
55  
56  
57  
58  
59  
60



1  
2  
3 [http://www.commonwealthfund.org/publications/chartbooks/2002/apr/quality-of-health-care-in-](http://www.commonwealthfund.org/publications/chartbooks/2002/apr/quality-of-health-care-in-the-united-states--a-chartbook)  
4 [the-united-states--a-chartbook](http://www.commonwealthfund.org/publications/chartbooks/2002/apr/quality-of-health-care-in-the-united-states--a-chartbook) (accessed 06 Dec 2017).

5  
6  
7  
8 45. Edwards ST, Landon BE. Medicare's chronic care management payment — payment  
9 reform for primary care. *N Engl J Med* 2014;371:2049-51.

10  
11  
12 46. Baron RJ, Davis K. Accelerating the adoption of high-value primary care — a new  
13 provider type under Medicare? *N Engl J Med* 2014;370:99-101.

14  
15  
16  
17 47. McWilliams JM, Chernew ME, Landon BE, et al. Performance differences in year 1 of  
18 pioneer accountable care organizations. *N Engl J Med* 2015;372:1927-36.

19  
20  
21  
22 48. McWilliams J, Landon BE, Chernew ME. Changes in health care spending and quality  
23 for medicare beneficiaries associated with a commercial ACO contract. *JAMA* 2013;310:829-36.

24  
25  
26  
27 49. McWilliams JM, Landon BE, Chernew ME, et al. Changes in patients' experiences in  
28 Medicare accountable care organizations. *N Engl J Med* 2014;371:1715-24.

29  
30  
31  
32 50. Frey WH. Melting Pot Cities and Suburbs: Racial and Ethnic Change in Metro America  
33 in the 2000s. Washington, DC: Brookings Institution, Metropolitan Policy Program; 2011.

34  
35  
36  
37 [https://www.brookings.edu/wp-content/uploads/2016/06/0504\\_census\\_ethnicity\\_frey.pdf](https://www.brookings.edu/wp-content/uploads/2016/06/0504_census_ethnicity_frey.pdf)  
38 (accessed 06 Dec 2017).

39  
40  
41  
42 51. Artiga S, Foutz J, Cornachione E, et al. Key Facts on Health and Health Care by Race  
43 and Ethnicity. Section 4: Health Coverage. The Henry J. Kaiser Family Foundation; 2016.

44  
45  
46  
47 [https://www.kff.org/report-section/key-facts-on-health-and-health-care-by-race-and-ethnicity-](https://www.kff.org/report-section/key-facts-on-health-and-health-care-by-race-and-ethnicity-section-4-health-coverage/)  
48 [section-4-health-coverage/](https://www.kff.org/report-section/key-facts-on-health-and-health-care-by-race-and-ethnicity-section-4-health-coverage/) (accessed 06 Dec 2017).

49  
50  
51  
52 52. Flores G, Abreu M, Olivar MA, et al. Access barriers to health care for Latino children.  
53 *Arch Pediatr Adolesc Med* 1998;152:1119-25.

- 1  
2  
3 53. Perez-Escamilla R, Garcia J, Song D. HEALTH CARE ACCESS AMONG HISPANIC  
4 IMMIGRANTS: ¿ALGUIEN ESTA ESCUCHANDO? [IS ANYBODY LISTENING?]. *NAPA*  
5  
6 *bulletin* 2010;34:47-67.  
7  
8  
9  
10 54. Artiga S, Young K, Garfield R, et al. Racial and Ethnic Disparities in Access to and  
11 Utilization of Care among Insured Adults. The Henry J. Kaiser Family Foundation; 2015.  
12  
13 [https://www.kff.org/disparities-policy/issue-brief/racial-and-ethnic-disparities-in-access-to-and-](https://www.kff.org/disparities-policy/issue-brief/racial-and-ethnic-disparities-in-access-to-and-utilization-of-care-among-insured-adults/)  
14 [utilization-of-care-among-insured-adults/](https://www.kff.org/disparities-policy/issue-brief/racial-and-ethnic-disparities-in-access-to-and-utilization-of-care-among-insured-adults/) (accessed 06 Dec 2017).  
15  
16  
17  
18  
19 55. Burt C, IE A. Characteristics of emergency departments serving high volumes of safety-  
20 net patients: United States, 2000. *Vital health Stat 13*. 2004:1-16.  
21  
22  
23 56. Adams JG. Overuse of emergency departments—reply. *JAMA* 2013;309:2549-50.  
24  
25  
26 57. Pitts SR, Carrier ER, Rich EC, et al. Where Americans get acute care: increasingly, it's  
27 not at their doctor's office. *Health Aff (Millwood)* 2010;29:1620-9.  
28  
29  
30 58. Asplin BR, Rhodes KV, Levy H, et al. Insurance status and access to urgent ambulatory  
31 care follow-up appointments. *JAMA* 2005;294:1248-54.  
32  
33  
34  
35 59. Decker SL. In 2011 nearly one-third of physicians said they would not accept new  
36 Medicaid patients, but rising fees may help. *Health Aff (Millwood)* 2012;31:1673-9.  
37  
38  
39 60. Billings J, Parikh N, Mijanovich T. Emergency department use: the New York story.  
40 New York, NY: The Commonwealth Fund. Issue Brief #434; 2000.  
41  
42 [http://www.commonwealthfund.org/usr\\_doc/billings\\_nystory.pdf](http://www.commonwealthfund.org/usr_doc/billings_nystory.pdf) (accessed 06 Dec 2017).  
43  
44  
45  
46 61. Kangovi S, Barg FK, Carter T, et al. Understanding why patients of low socioeconomic  
47 status prefer hospitals over ambulatory care. *Health Aff (Millwood)* 2013;32:1196-203.  
48  
49  
50  
51  
52  
53  
54  
55  
56  
57  
58  
59  
60

- 1  
2  
3 62. Hudon C, Sanche S, Haggerty JL. Personal characteristics and experience of primary care  
4 predicting frequent use of emergency department: a prospective cohort study. *PLoS One*  
5  
6 2016;11:e0157489.  
7  
8  
9  
10 63. Trzeciak S, Rivers E. Emergency department overcrowding in the United States: an  
11  
12 emerging threat to patient safety and public health. *Emerg Med J* 2003;20:402-5.  
13  
14  
15 64. Pitts SR, Pines JM, Handrigan MT, et al. National trends in emergency department  
16  
17 occupancy, 2001 to 2008: effect of inpatient admissions versus emergency department practice  
18  
19 intensity. *Ann Emerg Med* 2012;60:679-86.e3.  
20  
21  
22 65. Raven MC, Lowe RA, Maselli J, et al. Comparison of presenting complaint vs discharge  
23  
24 diagnosis for identifying “nonemergency” emergency department visits. *JAMA* 2013;309:1145-  
25  
26 53.  
27  
28  
29 66. Hsia RY, Nath JB, Baker LC. California emergency department visit rates for medical  
30  
31 conditions increased while visit rates for injuries fell, 2005–11. *Health Aff (Millwood)*  
32  
33 2015;34:621-6.  
34  
35  
36 67. Office of Disease Prevention and Health Promotion. General health status: chronic  
37  
38 disease prevalence 2016. [https://www.healthypeople.gov/2020/about/foundation-health-](https://www.healthypeople.gov/2020/about/foundation-health-measures/General-Health-Status - chronic)  
39  
40 [measures/General-Health-Status - chronic](https://www.healthypeople.gov/2020/about/foundation-health-measures/General-Health-Status - chronic) (accessed 06 Dec 2017).  
41  
42  
43  
44  
45  
46  
47  
48  
49  
50  
51  
52  
53  
54  
55  
56  
57  
58  
59  
60

## FIGURE LEGEND

### Figure 1

*Caption:* Proportion of discharged and admitted emergency department visits, 2005-2015

*Source:* Authors' analysis of Emergency Discharge Data and Patient Discharge Data from the California Office of Statewide Health Planning and Development, 2005-2015.

### Figure 2

*Caption:* Proportion of emergency department visits by payer, 2005-2015

*Source:* Authors' analysis of Emergency Discharge Data and Patient Discharge Data from the California Office of Statewide Health Planning and Development, 2005-2015

### Figure 3

*Caption:* Emergency department visits by diagnosis, 2005-2015

*Source:* Authors' analysis of Emergency Discharge Data from the California Office of Statewide Health Planning and Development, 2005-2015

**Table 1. Descriptive characteristics of emergency department visits, 2005-2015**

| Characteristic         | 2005     | 2006     | 2007     | 2008     | 2009     | 2010     | 2011     | 2012     | 2013     | 2014     | 2015     | % Change | P-value |
|------------------------|----------|----------|----------|----------|----------|----------|----------|----------|----------|----------|----------|----------|---------|
| <b>Total ED visits</b> | 10187048 | 10172173 | 10476830 | 10777904 | 11654758 | 11564940 | 11960916 | 12407787 | 12717983 | 13379768 | 14228961 | 39.7%    | <0.001  |
| <b>Age group</b>       |          |          |          |          |          |          |          |          |          |          |          |          |         |
| <5                     | 1163718  | 1138675  | 1208600  | 1227060  | 1385661  | 1301325  | 1293277  | 1279965  | 1296007  | 1284076  | 1360921  | 16.9%    | 0.002   |
| 5-19                   | 1543281  | 1508767  | 1548365  | 1580477  | 1850406  | 1704412  | 1748506  | 1768990  | 1851782  | 1926985  | 2060762  | 33.5%    | <0.001  |
| 20-44                  | 3540709  | 3503045  | 3567013  | 3621196  | 3858230  | 3857008  | 3984261  | 4158612  | 4238892  | 4546171  | 4817840  | 36.1%    | <0.001  |
| 45-64                  | 2169625  | 2224611  | 2321347  | 2441078  | 2596714  | 2671541  | 2794199  | 2939632  | 2997090  | 3197982  | 3379431  | 55.8%    | <0.001  |
| 65+                    | 1769715  | 1797075  | 1831505  | 1908093  | 1963747  | 2030654  | 2140673  | 2260588  | 2334212  | 2424554  | 2610007  | 47.5%    | <0.001  |
| <b>Sex</b>             |          |          |          |          |          |          |          |          |          |          |          |          |         |
| Male                   | 4749677  | 4744206  | 4870474  | 4982441  | 5361116  | 5305158  | 5478365  | 5674693  | 5821163  | 6111803  | 6533740  | 37.6%    | <0.001  |
| Female                 | 5400871  | 5426867  | 5605380  | 5794994  | 6293259  | 6259489  | 6482298  | 6732782  | 6896402  | 7267461  | 7694688  | 42.5%    | <0.001  |
| Unknown                | 36498    | 1092     | 973      | 463      | 383      | 290      | 251      | 310      | 418      | 504      | 518      | -98.6%   | 0.243   |
| <b>Race/Ethnicity</b>  |          |          |          |          |          |          |          |          |          |          |          |          |         |
| NH White               | 4629083  | 4678727  | 4803242  | 4882971  | 5136236  | 5101499  | 5215676  | 5364074  | 5343623  | 5473429  | 5670856  | 22.5%    | <0.001  |
| NH Black               | 995223   | 1039629  | 1103005  | 1163257  | 1282527  | 1298439  | 1349509  | 1413949  | 1427593  | 1497705  | 1566555  | 57.4%    | <0.001  |
| Hispanic               | 3003407  | 3087315  | 3289467  | 3489075  | 3983295  | 3913063  | 4120055  | 4314009  | 4580423  | 4911172  | 5358365  | 78.4%    | <0.001  |
| Other                  | 853928   | 897019   | 952814   | 971168   | 1060702  | 1086787  | 1123314  | 1160613  | 1200721  | 1303590  | 1447204  | 69.5%    | <0.001  |
| <b>Payer</b>           |          |          |          |          |          |          |          |          |          |          |          |          |         |
| Private                | 3568181  | 3524078  | 3607646  | 3671131  | 3831600  | 3596830  | 3682133  | 3749377  | 3635780  | 3781082  | 3788784  | 6.2%     | 0.002   |
| Medicaid               | 2330998  | 2328948  | 2475271  | 2652643  | 3114505  | 3117815  | 3229952  | 3362952  | 3629446  | 4858001  | 5849956  | 151.0%   | 0.001   |
| Medicare               | 1901449  | 1961387  | 2021499  | 2136053  | 2213792  | 2329984  | 2470110  | 2642609  | 2728514  | 2839188  | 3002826  | 57.9%    | <0.001  |
| Uninsured/self-pay     | 1569042  | 1621182  | 1677550  | 1697604  | 1823444  | 1838886  | 1882198  | 1892743  | 1909953  | 1386455  | 1093733  | -30.3%   | 0.527   |
| Other                  | 813974   | 734799   | 691266   | 617190   | 669627   | 679615   | 694036   | 757560   | 810812   | 511859   | 488805   | -39.9%   | 0.112   |
| Unknown                | 3404     | 1779     | 3598     | 3283     | 1790     | 1810     | 2487     | 2546     | 3478     | 3183     | 4857     | 42.7%    | 0.307   |
| <b>MSA</b>             |          |          |          |          |          |          |          |          |          |          |          |          |         |
| Urban                  | 9833448  | 9820399  | 10126757 | 10425976 | 11289497 | 11207639 | 11601631 | 12046167 | 12345194 | 12994568 | 13814543 | 40.5%    | <0.001  |
| Rural                  | 353600   | 351774   | 350073   | 351928   | 365261   | 357301   | 359285   | 361620   | 372789   | 385200   | 414418   | 17.2%    | 0.010   |

**Table 2. Emergency department visit rates (per 1000 population), 2005-2015**

|                            | 2005  | 2006  | 2007  | 2008  | 2009  | 2010  | 2011  | 2012  | 2013  | 2014  | 2015  | % Change | P-value |
|----------------------------|-------|-------|-------|-------|-------|-------|-------|-------|-------|-------|-------|----------|---------|
| <b>Total ED visit rate</b> | 284.3 | 282.4 | 289.0 | 294.4 | 315.3 | 309.8 | 317.3 | 326.0 | 331.1 | 344.9 | 363.5 | 27.8%    | <0.001  |
| <b>Age group</b>           |       |       |       |       |       |       |       |       |       |       |       |          |         |
| <5                         | 455.4 | 448.4 | 474.8 | 479.1 | 544.5 | 514.3 | 510.3 | 508.8 | 518.5 | 512.9 | 542.5 | 19.1%    | <0.001  |
| 5-19                       | 195.7 | 191.3 | 196.7 | 200.4 | 234.0 | 215.8 | 223.4 | 227.3 | 239.0 | 250.1 | 268.9 | 37.4%    | <0.001  |
| 20-44                      | 266.9 | 264.9 | 270.7 | 274.5 | 291.9 | 290.0 | 296.3 | 306.0 | 309.2 | 328.6 | 346.4 | 29.8%    | <0.001  |
| 45-64                      | 100.7 | 102.4 | 106.1 | 110.5 | 116.2 | 118.1 | 121.8 | 127.0 | 128.3 | 135.5 | 142.1 | 41.1%    | <0.001  |
| 65+                        | 461.0 | 464.1 | 464.0 | 470.3 | 471.5 | 474.8 | 485.9 | 490.6 | 486.6 | 486.2 | 503.0 | 9.1%     | <0.001  |
| <b>Sex</b>                 |       |       |       |       |       |       |       |       |       |       |       |          |         |
| Male                       | 266.4 | 264.7 | 270.1 | 273.6 | 291.7 | 285.9 | 292.5 | 300.1 | 305.1 | 317.2 | 336.0 | 26.2%    | <0.001  |
| Female                     | 300.1 | 299.9 | 307.7 | 315.0 | 338.7 | 333.3 | 341.7 | 351.6 | 356.7 | 372.2 | 390.6 | 30.1%    | <0.001  |
| <b>Race/Ethnicity</b>      |       |       |       |       |       |       |       |       |       |       |       |          |         |
| NH White                   | 294.5 | 299.4 | 308.8 | 315.3 | 336.8 | 339.6 | 347.9 | 358.2 | 357.4 | 366.8 | 381.1 | 29.4%    | <0.001  |
| NH Black                   | 448.2 | 469.0 | 497.7 | 524.7 | 581.5 | 593.7 | 615.1 | 642.3 | 646.9 | 675.1 | 702.9 | 56.8%    | <0.001  |
| Hispanic                   | 237.1 | 238.9 | 249.5 | 259.5 | 288.8 | 278.1 | 287.8 | 296.8 | 310.6 | 328.0 | 352.9 | 48.8%    | <0.001  |
| Other                      | 185.3 | 191.6 | 199.8 | 199.9 | 214.7 | 211.3 | 213.6 | 215.7 | 217.6 | 230.2 | 249.2 | 34.4%    | <0.001  |
| <b>Payer</b>               |       |       |       |       |       |       |       |       |       |       |       |          |         |
| Private                    | 171.0 | 166.2 | 168.9 | 174.7 | 196.9 | 180.1 | 186.5 | 181.8 | 186.1 | 184.6 | 181.4 | 6.1%     | 0.012   |
| Medicaid                   | 580.9 | 574.7 | 596.5 | 605.6 | 611.2 | 638.0 | 623.6 | 654.1 | 645.2 | 731.6 | 747.3 | 28.6%    | <0.001  |
| Medicare                   | 459.2 | 490.6 | 492.0 | 501.3 | 497.7 | 496.4 | 516.7 | 539.1 | 529.8 | 528.7 | 536.9 | 16.9%    | <0.001  |
| Uninsured/self-pay         | 242.2 | 251.5 | 263.6 | 255.8 | 249.0 | 254.4 | 253.5 | 278.9 | 293.8 | 290.8 | 329.7 | 36.1%    | 0.002   |
| <b>MSA</b>                 |       |       |       |       |       |       |       |       |       |       |       |          |         |
| Urban                      | 281.0 | 279.1 | 286.0 | 291.5 | 312.6 | 307.2 | 314.8 | 323.6 | 328.5 | 342.3 | 360.6 | 28.3%    | <0.001  |
| Rural                      | 425.7 | 421.8 | 418.7 | 419.9 | 435.1 | 425.0 | 429.0 | 434.7 | 451.0 | 466.3 | 500.8 | 17.6%    | 0.010   |

Note: ED visit rate denominator includes the population of the corresponding characteristic (e.g. ED visits by male patients in given year/total male population in given year in CA).

1  
2  
3  
4  
5  
6  
7  
8  
9  
10  
11  
12  
13  
14  
15  
16  
17  
18  
19  
20  
21  
22  
23  
24  
25  
26  
27  
28  
29  
30  
31  
32  
33  
34  
35  
36  
37  
38  
39  
40  
41  
42  
43  
44  
45  
46  
47  
48  
49  
50  
51  
52  
53  
54  
55  
56  
57  
58  
59  
60

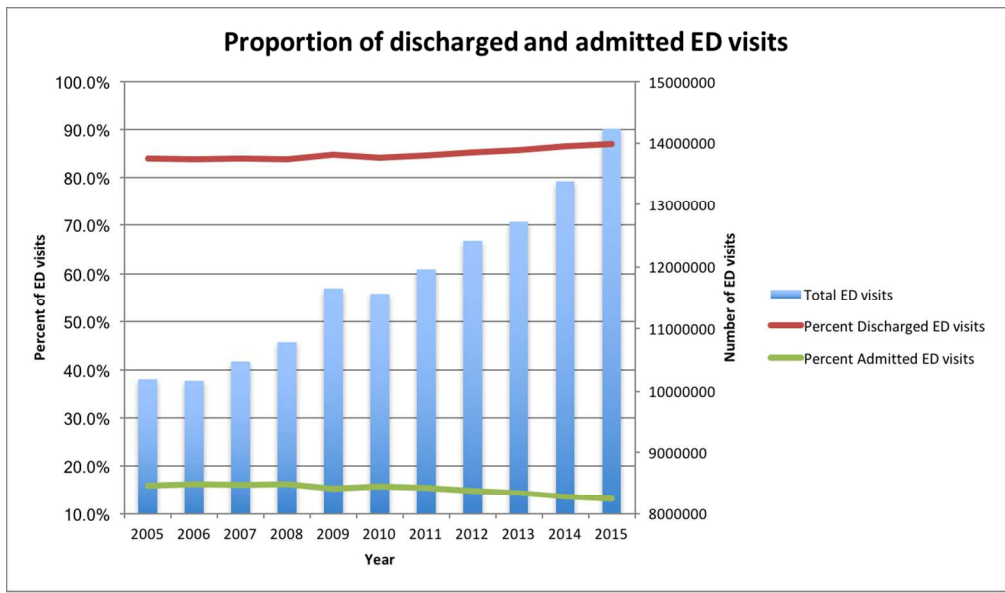

Figure 1. Proportion of discharged and admitted emergency department visits, 2005-2015 *Source: Authors' analysis of Emergency Discharge Data and Patient Discharge Data from the California Office of Statewide Health Planning and Development, 2005-2015*

111x65mm (300 x 300 DPI)

view only

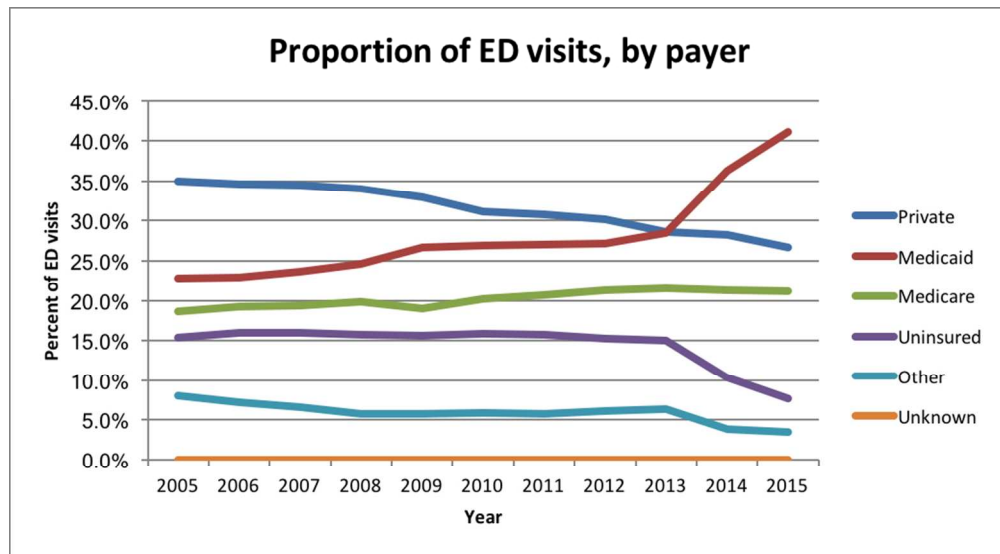

Figure 2. Proportion of emergency department visits by payer, 2005-2015 *Source: Authors' analysis of Emergency Discharge Data and Patient Discharge Data from the California Office of Statewide Health Planning and Development, 2005-2015*

88x48mm (300 x 300 DPI)

Review only



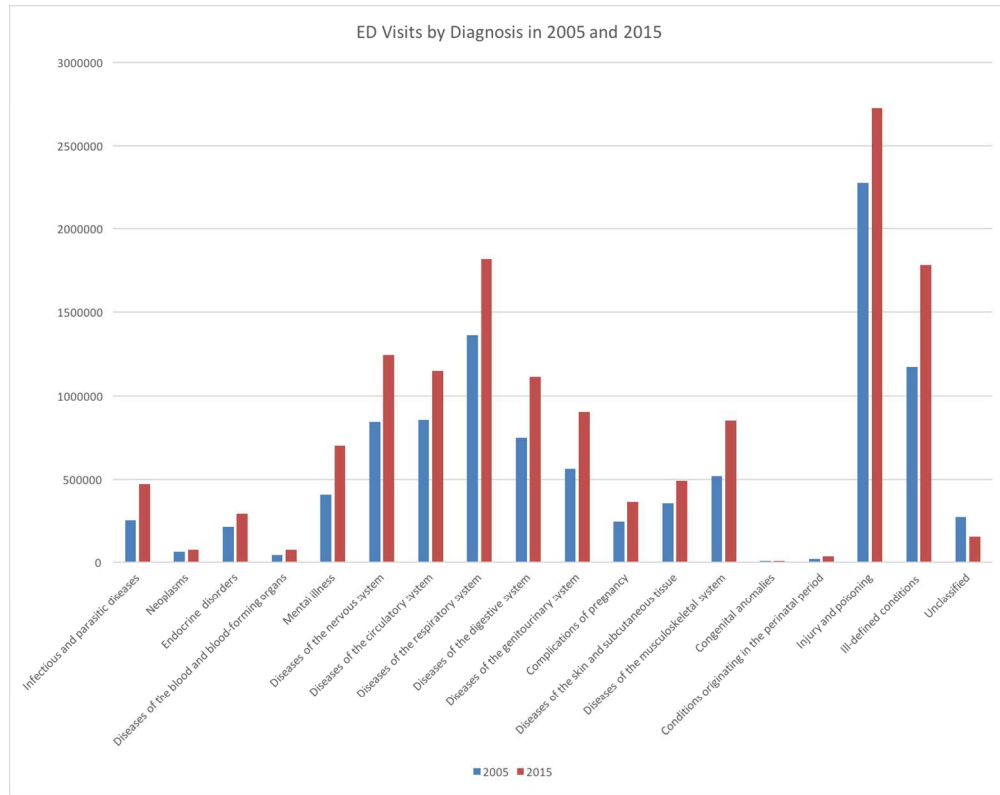

Figure 3. Emergency department visits by diagnosis, 2005-2015 *Source: Authors' analysis of Emergency Discharge Data from the California Office of Statewide Health Planning and Development, 2005-2015*

129x102mm (300 x 300 DPI)

only

## APPENDIX

Table A. Emergency department visit trends 2005-2015, privately insured

|                         | 2005    | 2006    | 2007    | 2008    | 2009    | 2010    | 2011    | 2012    | 2013    | 2014    | 2015    | % Change |
|-------------------------|---------|---------|---------|---------|---------|---------|---------|---------|---------|---------|---------|----------|
| <b>Age group, years</b> |         |         |         |         |         |         |         |         |         |         |         |          |
| <5                      | 429459  | 408964  | 425124  | 430059  | 459516  | 418544  | 410245  | 391188  | 361352  | 340709  | 323370  | -24.70%  |
| 5-19                    | 708116  | 687035  | 692650  | 705363  | 793381  | 711824  | 723207  | 711686  | 669511  | 657252  | 638977  | -9.76%   |
| 20-44                   | 1346838 | 1326662 | 1345311 | 1351430 | 1363911 | 1281028 | 1337662 | 1387663 | 1362165 | 1460033 | 1466015 | 8.85%    |
| 45-64                   | 937683  | 950346  | 983027  | 1011740 | 1036109 | 1016319 | 1034170 | 1078507 | 1056692 | 1130772 | 1157000 | 23.39%   |
| 65+                     | 146085  | 151071  | 161534  | 172539  | 178683  | 169115  | 176849  | 180333  | 186060  | 192316  | 203422  | 39.25%   |
| <b>Sex</b>              |         |         |         |         |         |         |         |         |         |         |         |          |
| Male                    | 1663208 | 1644771 | 1683651 | 1703166 | 1770583 | 1651551 | 1690084 | 1709483 | 1652877 | 1712209 | 1737064 | 4.44%    |
| Female                  | 1900535 | 1878899 | 1923691 | 1967771 | 2060874 | 1945181 | 1991951 | 2039774 | 1982812 | 2068747 | 2051590 | 7.95%    |
| <b>Race/Ethnicity</b>   |         |         |         |         |         |         |         |         |         |         |         |          |
| White                   | 1735384 | 1764498 | 1829347 | 1838610 | 1889460 | 1763218 | 1787345 | 1804017 | 1742043 | 1764406 | 1728905 | -0.37%   |
| Black                   | 259335  | 274790  | 290607  | 294616  | 314387  | 301938  | 312298  | 322555  | 305612  | 308854  | 303153  | 16.90%   |
| Hispanic                | 819647  | 859756  | 926181  | 981879  | 1087422 | 1016798 | 1064338 | 1094322 | 1066446 | 1144353 | 1166619 | 42.33%   |
| Other                   | 330650  | 366942  | 401212  | 413098  | 446058  | 433656  | 447306  | 456385  | 449984  | 479157  | 506248  | 53.11%   |
| Unknown                 | 423165  | 258092  | 160299  | 142928  | 94273   | 81220   | 70846   | 72098   | 71695   | 84312   | 83859   | -80.18%  |

**Table B. Emergency department visit trends 2005-2015, Medicaid insured**

|                         | 2005    | 2006    | 2007    | 2008    | 2009    | 2010    | 2011    | 2012    | 2013    | 2014    | 2015    | % Change |
|-------------------------|---------|---------|---------|---------|---------|---------|---------|---------|---------|---------|---------|----------|
| <b>Age group, years</b> |         |         |         |         |         |         |         |         |         |         |         |          |
| <5                      | 542614  | 544552  | 593483  | 628214  | 747939  | 717052  | 718256  | 724611  | 768987  | 780620  | 888449  | 63.73%   |
| 5-19                    | 522055  | 514867  | 545227  | 586634  | 747137  | 710344  | 745759  | 776316  | 903245  | 1009845 | 1190903 | 128.12%  |
| 20-44                   | 793956  | 788866  | 824338  | 878460  | 1010731 | 1054531 | 1098763 | 1159400 | 1216910 | 1860400 | 2327443 | 193.15%  |
| 45-64                   | 402904  | 413617  | 441945  | 484342  | 532408  | 557115  | 590926  | 625197  | 658112  | 1115845 | 1337561 | 231.98%  |
| 65+                     | 69469   | 67046   | 70278   | 74993   | 76290   | 78773   | 76248   | 77428   | 82192   | 91291   | 105600  | 52.01%   |
| <b>Sex</b>              |         |         |         |         |         |         |         |         |         |         |         |          |
| Male                    | 957166  | 949817  | 1012699 | 1085992 | 1281902 | 1274150 | 1320155 | 1376332 | 1501034 | 2129754 | 2598751 | 171.50%  |
| Female                  | 1371554 | 1379005 | 1462442 | 1566587 | 1832524 | 1843597 | 1909759 | 1986582 | 2128339 | 2728127 | 3251043 | 137.03%  |
| <b>Race/Ethnicity</b>   |         |         |         |         |         |         |         |         |         |         |         |          |
| White                   | 731384  | 719852  | 754567  | 794179  | 895803  | 906345  | 922269  | 941378  | 960099  | 1382263 | 1669637 | 128.28%  |
| Black                   | 308077  | 319736  | 342370  | 377544  | 432888  | 438186  | 457551  | 482857  | 508968  | 680050  | 772846  | 150.86%  |
| Hispanic                | 1048204 | 1060758 | 1151617 | 1254527 | 1534361 | 1511196 | 1590293 | 1676984 | 1866746 | 2389237 | 2903001 | 176.95%  |
| Other                   | 181239  | 181922  | 188889  | 188165  | 218784  | 232492  | 232486  | 235241  | 257996  | 360311  | 464135  | 156.09%  |
| Unknown                 | 62094   | 46680   | 37828   | 38228   | 32669   | 29596   | 27353   | 26492   | 35637   | 46140   | 40337   | -35.04%  |

**Table C. Emergency department visit trends 2005-2015, Medicare insured**

|                         | 2005    | 2006    | 2007    | 2008    | 2009    | 2010    | 2011    | 2012    | 2013    | 2014    | 2015    | % Change |
|-------------------------|---------|---------|---------|---------|---------|---------|---------|---------|---------|---------|---------|----------|
| <b>Age group, years</b> |         |         |         |         |         |         |         |         |         |         |         |          |
| <5                      | 8243    | 4200    | 5373    | 6251    | 5090    | 10439   | 10503   | 11613   | 13680   | 14754   | 12550   | 52.25%   |
| 5-19                    | 10797   | 6279    | 6593    | 8337    | 7945    | 12708   | 14009   | 16263   | 19637   | 22658   | 21148   | 95.87%   |
| 20-44                   | 143152  | 140675  | 148033  | 160620  | 167879  | 179749  | 188514  | 205036  | 206723  | 215200  | 212123  | 48.18%   |
| 45-64                   | 275977  | 295922  | 318067  | 346547  | 370181  | 393129  | 420238  | 459603  | 477958  | 505885  | 522212  | 89.22%   |
| 65+                     | 1463280 | 1514311 | 1543433 | 1614298 | 1662697 | 1733959 | 1836846 | 1950094 | 2010516 | 2080691 | 2234793 | 52.72%   |
| <b>Sex</b>              |         |         |         |         |         |         |         |         |         |         |         |          |
| Male                    | 821355  | 844714  | 867868  | 917990  | 950000  | 1006743 | 1066235 | 1142955 | 1189472 | 1240239 | 1318555 | 60.53%   |
| Female                  | 1077719 | 1116566 | 1153548 | 1218014 | 1263757 | 1323213 | 1403845 | 1499617 | 1538996 | 1598904 | 1684217 | 56.28%   |
| <b>Race/Ethnicity</b>   |         |         |         |         |         |         |         |         |         |         |         |          |
| White                   | 1222354 | 1258172 | 1299775 | 1346473 | 1382103 | 1441869 | 1510711 | 1599925 | 1624635 | 1663996 | 1742676 | 42.57%   |
| Black                   | 159263  | 170620  | 181588  | 198505  | 211765  | 224865  | 238157  | 257281  | 264718  | 277381  | 290440  | 82.37%   |
| Hispanic                | 297507  | 315033  | 334522  | 371907  | 399036  | 431504  | 469415  | 517413  | 549923  | 583293  | 626736  | 110.66%  |
| Other                   | 156948  | 164791  | 176161  | 190060  | 197222  | 212005  | 231632  | 249920  | 268873  | 285875  | 315090  | 100.76%  |
| Unknown                 | 65377   | 52771   | 29453   | 29108   | 23666   | 19741   | 20195   | 18070   | 20365   | 28643   | 27884   | -57.35%  |

**Table D. Emergency department visit trends 2005-2015, uninsured**

|                         | 2005   | 2006   | 2007   | 2008   | 2009   | 2010    | 2011    | 2012    | 2013    | 2014   | 2015   | % Change |
|-------------------------|--------|--------|--------|--------|--------|---------|---------|---------|---------|--------|--------|----------|
| <b>Age group, years</b> |        |        |        |        |        |         |         |         |         |        |        |          |
| <5                      | 115388 | 120322 | 125362 | 114960 | 120588 | 107766  | 107416  | 105162  | 106741  | 101823 | 95770  | -17.00%  |
| 5-19                    | 199444 | 209014 | 216387 | 206858 | 222832 | 199173  | 194820  | 189107  | 189898  | 165966 | 143520 | -28.04%  |
| 20-44                   | 848935 | 887578 | 913148 | 931697 | 996065 | 1015494 | 1030280 | 1055437 | 1072956 | 777655 | 587183 | -30.83%  |
| 45-64                   | 346667 | 368433 | 385732 | 411485 | 451282 | 483683  | 515769  | 509668  | 504880  | 303459 | 227679 | -34.32%  |
| 65+                     | 58608  | 35835  | 36921  | 32604  | 32677  | 32770   | 33913   | 33369   | 35478   | 37552  | 39581  | -32.46%  |
| <b>Sex</b>              |        |        |        |        |        |         |         |         |         |        |        |          |
| Male                    | 859641 | 890163 | 912620 | 922018 | 984241 | 994896  | 1018562 | 1026193 | 1028873 | 748368 | 603828 | -29.76%  |
| Female                  | 705696 | 730669 | 764579 | 775460 | 839104 | 843907  | 863567  | 866453  | 880913  | 637901 | 489743 | -30.60%  |
| <b>Race/Ethnicity</b>   |        |        |        |        |        |         |         |         |         |        |        |          |
| White                   | 593788 | 617404 | 649223 | 648562 | 697406 | 709652  | 710073  | 713594  | 695377  | 459614 | 335463 | -43.50%  |
| Black                   | 178541 | 196121 | 209552 | 221673 | 242739 | 252220  | 260977  | 257628  | 244939  | 171578 | 137722 | -22.86%  |
| Hispanic                | 584084 | 626675 | 646508 | 659205 | 719615 | 712070  | 742101  | 745133  | 795756  | 610154 | 490429 | -16.03%  |
| Other                   | 112259 | 119253 | 125578 | 125144 | 135331 | 141106  | 145983  | 148282  | 146588  | 120039 | 105257 | -6.24%   |
| Unknown                 | 100370 | 61729  | 46689  | 43020  | 28353  | 23838   | 23064   | 28106   | 27293   | 25070  | 24862  | -75.23%  |

**STROBE 2007 (v4) checklist of items to be included in reports of observational studies in epidemiology\***  
**Checklist for cohort, case-control, and cross-sectional studies (combined)**

| Section/Topic             | Item # | Recommendation                                                                                                                                                                                                                                                                                                                                                                                                                                                         | Reported on page # |
|---------------------------|--------|------------------------------------------------------------------------------------------------------------------------------------------------------------------------------------------------------------------------------------------------------------------------------------------------------------------------------------------------------------------------------------------------------------------------------------------------------------------------|--------------------|
| Title and abstract        | 1      | (a) Indicate the study's design with a commonly used term in the title or the abstract                                                                                                                                                                                                                                                                                                                                                                                 | 1                  |
|                           |        | (b) Provide in the abstract an informative and balanced summary of what was done and what was found                                                                                                                                                                                                                                                                                                                                                                    | 2                  |
| <b>Introduction</b>       |        |                                                                                                                                                                                                                                                                                                                                                                                                                                                                        |                    |
| Background/rationale      | 2      | Explain the scientific background and rationale for the investigation being reported                                                                                                                                                                                                                                                                                                                                                                                   | 4-5                |
| Objectives                | 3      | State specific objectives, including any pre-specified hypotheses                                                                                                                                                                                                                                                                                                                                                                                                      | 5                  |
| <b>Methods</b>            |        |                                                                                                                                                                                                                                                                                                                                                                                                                                                                        |                    |
| Study design              | 4      | Present key elements of study design early in the paper                                                                                                                                                                                                                                                                                                                                                                                                                | 5-6                |
| Setting                   | 5      | Describe the setting, locations, and relevant dates, including periods of recruitment, exposure, follow-up, and data collection                                                                                                                                                                                                                                                                                                                                        | 5-6                |
| Participants              | 6      | (a) <i>Cohort study</i> —Give the eligibility criteria, and the sources and methods of selection of participants. Describe methods of follow-up<br><i>Case-control study</i> —Give the eligibility criteria, and the sources and methods of case ascertainment and control selection. Give the rationale for the choice of cases and controls<br><i>Cross-sectional study</i> —Give the eligibility criteria, and the sources and methods of selection of participants | 6                  |
|                           |        | (b) <i>Cohort study</i> —For matched studies, give matching criteria and number of exposed and unexposed<br><i>Case-control study</i> —For matched studies, give matching criteria and the number of controls per case                                                                                                                                                                                                                                                 | n/a                |
| Variables                 | 7      | Clearly define all outcomes, exposures, predictors, potential confounders, and effect modifiers. Give diagnostic criteria, if applicable                                                                                                                                                                                                                                                                                                                               | 6                  |
| Data sources/ measurement | 8*     | For each variable of interest, give sources of data and details of methods of assessment (measurement). Describe comparability of assessment methods if there is more than one group                                                                                                                                                                                                                                                                                   | 6                  |
| Bias                      | 9      | Describe any efforts to address potential sources of bias                                                                                                                                                                                                                                                                                                                                                                                                              | n/a                |
| Study size                | 10     | Explain how the study size was arrived at                                                                                                                                                                                                                                                                                                                                                                                                                              | 6                  |
| Quantitative variables    | 11     | Explain how quantitative variables were handled in the analyses. If applicable, describe which groupings were chosen and why                                                                                                                                                                                                                                                                                                                                           | 6                  |
| Statistical methods       | 12     | (a) Describe all statistical methods, including those used to control for confounding                                                                                                                                                                                                                                                                                                                                                                                  | 6                  |
|                           |        | (b) Describe any methods used to examine subgroups and interactions                                                                                                                                                                                                                                                                                                                                                                                                    | 6                  |
|                           |        | (c) Explain how missing data were addressed                                                                                                                                                                                                                                                                                                                                                                                                                            | n/a                |
|                           |        | (d) <i>Cohort study</i> —If applicable, explain how loss to follow-up was addressed<br><i>Case-control study</i> —If applicable, explain how matching of cases and controls was addressed                                                                                                                                                                                                                                                                              | n/a                |

|                          |     |                                                                                                                                                                                                              |     |
|--------------------------|-----|--------------------------------------------------------------------------------------------------------------------------------------------------------------------------------------------------------------|-----|
|                          |     | <i>Cross-sectional study</i> —If applicable, describe analytical methods taking account of sampling strategy                                                                                                 |     |
|                          |     | (e) Describe any sensitivity analyses                                                                                                                                                                        | n/a |
| <b>Results</b>           |     |                                                                                                                                                                                                              |     |
| Participants             | 13* | (a) Report numbers of individuals at each stage of study—eg numbers potentially eligible, examined for eligibility, confirmed eligible, included in the study, completing follow-up, and analysed            | 7   |
|                          |     | (b) Give reasons for non-participation at each stage                                                                                                                                                         | n/a |
|                          |     | (c) Consider use of a flow diagram                                                                                                                                                                           | n/a |
| Descriptive data         | 14* | (a) Give characteristics of study participants (eg demographic, clinical, social) and information on exposures and potential confounders                                                                     | 7-8 |
|                          |     | (b) Indicate number of participants with missing data for each variable of interest                                                                                                                          | n/a |
|                          |     | (c) <i>Cohort study</i> —Summarise follow-up time (eg, average and total amount)                                                                                                                             | n/a |
| Outcome data             | 15* | <i>Cohort study</i> —Report numbers of outcome events or summary measures over time                                                                                                                          | 7   |
|                          |     | <i>Case-control study</i> —Report numbers in each exposure category, or summary measures of exposure                                                                                                         | n/a |
|                          |     | <i>Cross-sectional study</i> —Report numbers of outcome events or summary measures                                                                                                                           | n/a |
| Main results             | 16  | (a) Give unadjusted estimates and, if applicable, confounder-adjusted estimates and their precision (eg, 95% confidence interval). Make clear which confounders were adjusted for and why they were included | n/a |
|                          |     | (b) Report category boundaries when continuous variables were categorized                                                                                                                                    | n/a |
|                          |     | (c) If relevant, consider translating estimates of relative risk into absolute risk for a meaningful time period                                                                                             | n/a |
| Other analyses           | 17  | Report other analyses done—eg analyses of subgroups and interactions, and sensitivity analyses                                                                                                               | 8-9 |
| <b>Discussion</b>        |     |                                                                                                                                                                                                              |     |
| Key results              | 18  | Summarise key results with reference to study objectives                                                                                                                                                     | 9   |
| Limitations              | 19  | Discuss limitations of the study, taking into account sources of potential bias or imprecision. Discuss both direction and magnitude of any potential bias                                                   | 14  |
| Interpretation           | 20  | Give a cautious overall interpretation of results considering objectives, limitations, multiplicity of analyses, results from similar studies, and other relevant evidence                                   | 14  |
| Generalisability         | 21  | Discuss the generalisability (external validity) of the study results                                                                                                                                        | 14  |
| <b>Other information</b> |     |                                                                                                                                                                                                              |     |
| Funding                  | 22  | Give the source of funding and the role of the funders for the present study and, if applicable, for the original study on which the present article is based                                                | 15  |

\*Give information separately for cases and controls in case-control studies and, if applicable, for exposed and unexposed groups in cohort and cross-sectional studies.

**Note:** An Explanation and Elaboration article discusses each checklist item and gives methodological background and published examples of transparent reporting. The STROBE checklist is best used in conjunction with this article (freely available on the Web sites of PLoS Medicine at <http://www.plosmedicine.org/>, Annals of Internal Medicine at <http://www.annals.org/>, and Epidemiology at <http://www.epidem.com/>). Information on the STROBE Initiative is available at [www.strobe-statement.org](http://www.strobe-statement.org).

# BMJ Open

## Trends in the utilization of emergency departments in California, 2005-2015: a retrospective analysis

|                                 |                                                                                                                                                                                                                                                                                                                                                                                                                                                                                                                                                                                                             |
|---------------------------------|-------------------------------------------------------------------------------------------------------------------------------------------------------------------------------------------------------------------------------------------------------------------------------------------------------------------------------------------------------------------------------------------------------------------------------------------------------------------------------------------------------------------------------------------------------------------------------------------------------------|
| Journal:                        | <i>BMJ Open</i>                                                                                                                                                                                                                                                                                                                                                                                                                                                                                                                                                                                             |
| Manuscript ID                   | bmjopen-2017-021392.R1                                                                                                                                                                                                                                                                                                                                                                                                                                                                                                                                                                                      |
| Article Type:                   | Research                                                                                                                                                                                                                                                                                                                                                                                                                                                                                                                                                                                                    |
| Date Submitted by the Author:   | 08-Mar-2018                                                                                                                                                                                                                                                                                                                                                                                                                                                                                                                                                                                                 |
| Complete List of Authors:       | Hsia, Renee; UCSF, Emergency Medicine; University of California, San Francisco, Philip R. Lee Institute for Health Policy Studies<br>Sabbagh, Sarah; University of California, San Francisco, Emergency Medicine<br>Guo, Joanna; University of California, San Francisco, Emergency Medicine<br>Nuckton, Thomas; Sutter Eden Medical Center, Medicine; University of California, San Francisco, Medicine<br>Niedzwiecki, Matthew; University of California at San Francisco, Department of Emergency Medicine; University of California at San Francisco, Philip R. Lee Institute for Health Policy Studies |
| <b>Primary Subject Heading</b>: | Emergency medicine                                                                                                                                                                                                                                                                                                                                                                                                                                                                                                                                                                                          |
| Secondary Subject Heading:      | Emergency medicine                                                                                                                                                                                                                                                                                                                                                                                                                                                                                                                                                                                          |
| Keywords:                       | emergency department, healthcare delivery, utilization, demand                                                                                                                                                                                                                                                                                                                                                                                                                                                                                                                                              |
|                                 |                                                                                                                                                                                                                                                                                                                                                                                                                                                                                                                                                                                                             |

SCHOLARONE™  
Manuscripts

only



1  
2  
3 **Trends in the utilization of emergency departments in California, 2005-2015: a**  
4  
5 **retrospective analysis**  
6  
7  
8  
9

10 Renee Y. Hsia, MD, MSc,<sup>1,2</sup> Sarah H. Sabbagh, MPH,<sup>1</sup> Joanna Guo, BA,<sup>1</sup> Thomas J. Nuckton,  
11  
12 MD, MS,<sup>3,4</sup> Matthew J. Niedzwiecki, PhD<sup>1,2</sup>  
13  
14

15  
16  
17 <sup>1</sup>Department of Emergency Medicine, University of California, San Francisco; San Francisco,  
18  
19 California, USA  
20

21 <sup>2</sup>Philip R. Lee Institute for Health Policy Studies, University of California, San Francisco; San  
22  
23 Francisco, California, USA  
24

25  
26 <sup>3</sup>Department of Medicine, Sutter Eden Medical Center; Castro Valley, California, USA  
27

28 <sup>4</sup>Department of Medicine, University of California, San Francisco; San Francisco, California,  
29  
30 USA  
31  
32

33  
34  
35 **Corresponding author:**

36 Renee Y. Hsia, MD, MSc  
37 Department of Emergency Medicine  
38 University of California, San Francisco  
39 1001 Potrero Ave, 1E21, San Francisco General Hospital  
40 San Francisco, CA 94110  
41 Tel: (415) 206-4612  
42 Fax: (415) 206-5818  
43 Email: [renee.hsia@emergency.ucsf.edu](mailto:renee.hsia@emergency.ucsf.edu)  
44  
45  
46  
47  
48  
49

50 **Word Count (text only): 2,927**  
51  
52  
53  
54  
55  
56  
57  
58  
59  
60

## ABSTRACT

**Objectives:** To examine current trends and characteristics of patients visiting the emergency department (ED) and identify changes in the composition of ED visits over time to better direct the allocation of acute care resources.

**Design:** A retrospective study.

**Setting:** We analyzed ED utilization trends between 2005 and 2015 in California using non-public patient data from California's Office of Statewide Health Planning and Development.

**Participants:** We included all ED visits in California from 2005 to 2015.

**Primary and Secondary Outcome Measures:** We analyzed ED visits and visit rates by age, sex, race/ethnicity, payer, and urban/rural trends. We further examined age, sex, race/ethnicity, and urban/rural trends within each payer group for a more granular picture of the patient population. Additionally, we looked at the proportion of patients admitted from the ED and distribution of diagnoses.

**Results:** Between 2005 and 2015, the annual number of ED visits increased from 10.2 to 14.2 million in California. ED visit rates increased by 27.8% ( $p<0.001$ ), with the greatest increases among patients aged 5-19 (37.4%,  $p<0.001$ ) and 45-64 years (41.1%,  $p<0.001$ ), non-Hispanic Black and Hispanic patients (56.8% and 48.8%,  $p<0.001$ ), the uninsured and Medicaid-insured (36.1%,  $p=0.002$ ; 28.6%,  $p<0.001$ ), and urban residents (28.3%,  $p<0.001$ ). The proportion of ED visits resulting in hospitalization decreased by 18.3%, with decreases across all payer groups.

**Conclusions:** Our findings reveal an increasing demand for emergency care and may reflect current limitations in accessing care in other parts of the healthcare system. Policymakers may need to recognize the increasingly vital role that EDs are playing in the provision of care and consider ways to incorporate this changing reality into the delivery of health services.

**Keywords:** emergency department; utilization; demand; healthcare delivery

## STRENGTHS AND LIMITATIONS OF THIS STUDY

- This study examines patient characteristics and emergency department (ED) use trends longitudinally using a dataset containing all ED visits for the state of California.
- California's initiatives to increase Medicaid enrollment through the Affordable Care Act and Low Income Health Programs provide a unique opportunity to study how patient characteristics and healthcare needs have changed over time under continual and gradual efforts to increase healthcare access.
- Our data are limited to California residents, potentially limiting the generalizability of our results despite California's diverse population.
- ED visit rates may be slightly overestimated due to the fact that some populations who visit the ED frequently – including patients who are undocumented and homeless, or live in nursing homes, extended-care facilities, prisons, and mental health facilities – are not accounted for in the population denominator.

## INTRODUCTION

Emergency departments (EDs) are an integral component of the United States (US) health care system, as they provide the only around-the-clock health care to all, regardless of a patient's ability to pay.[1] In the past two decades, the annual number of ED visits in the US has increased by 50%, while the number of EDs has decreased by 11%,[2] raising concerns about the ability of EDs to provide accessible care amidst the rise in demand for emergency care services. Appropriate allocation of resources to meet such demands may require greater focus on ED utilization trends, which reflect the changing patterns of patient healthcare needs and reveal possible factors – including patient conditions, healthcare reform, or insurance coverage changes – that may contribute to the increase in demand for emergency care.[3,4]

Despite outpatient and primary care expansions and increased strategies aimed at reducing emergency care demand,[5-8] ED visits have continued to rise, with greater reliance on EDs to provide care that may be unavailable in other parts of the healthcare system.[9] Previous literature suggest that older patients, minorities, lower-income patients, and Medicaid beneficiaries are more likely to use the ED,[10] and recent reports have continued to show substantial increases in ED utilization, especially among Medicaid-insured patients.[11] However, most studies have either focused on short-term study periods using limited sample sizes to evaluate the impact of the Affordable Care Act (ACA) or have not incorporated measures to evaluate ED utilization relative to population changes.[12-15]

State-level examinations of the association between health insurance and ED use – particularly in the context of ACA reforms – have yielded complex and often conflicting results.[16] Although evaluating the impact of the ACA on healthcare utilization and outcomes remains an important task, our study provides a more comprehensive assessment of how patient characteristics and healthcare needs have changed over an 11-year period in California – one of

1  
2  
3 the largest and most diverse states in the country[17] – to help better design the necessary  
4  
5 policies and programs to meet patients’ healthcare needs. Additionally, California’s initiatives to  
6  
7 increase enrollment in Medicaid (a government health insurance program for qualified low-  
8  
9 income or disabled people) through the ACA and Low Income Health Programs (LIHP) provide  
10  
11 a unique opportunity to study how patient characteristics and healthcare needs have changed  
12  
13 over time under continual and gradual efforts to increase healthcare access. Thus, we sought to  
14  
15 examine state-level trends in emergency care demand from 2005 to 2015 in California. Using  
16  
17 state-level data, we analyzed patient age, sex, race/ethnicity, insurance status, and region of care  
18  
19 to examine where emergency care demands are most critical and where future resources may be  
20  
21 directed to improve care and lessen ED utilization. We hypothesized that ED visit rates would  
22  
23 increase between 2005 and 2015, particularly among minority, Medicaid-insured, and uninsured  
24  
25 patients.  
26  
27  
28  
29  
30  
31  
32

## 33 **METHODS**

### 34 **Study Design and Data Sources**

35  
36 We obtained 2005-2015 non-public Patient Discharge Data (PDD), Emergency  
37  
38 Department Data (EDD), Hospital Annual Financial Data, and Hospital Annual Utilization Data  
39  
40 from California’s Office of Statewide Health Planning and Development (OSHPD), which  
41  
42 conducts annual, standardized surveys required of all hospitals and health service facilities in  
43  
44 California.[18,19] To account for changes in California’s population over time, we calculated  
45  
46 annual ED utilization rates by age, sex, race/ethnicity, insurance payer, and urban/rural  
47  
48 residence. We used annual age and sex population estimates provided by the US Census  
49  
50 Bureau;[20,21] state population insurance coverage estimates from the Current Population  
51  
52 Survey’s Annual Social and Economic Supplements (for the years 2005-2012) and American  
53  
54  
55  
56  
57  
58  
59  
60

1  
2  
3 Community Survey (for the years 2013-2015);[22,23] and race/ethnicity population estimates  
4  
5 from the California Department of Finance (for the years 2005-2009) and the US Census Bureau  
6  
7 (for the years 2010-2015).[24,25]  
8  
9  
10  
11

## 12 **Inclusion Criteria and Variable Definition**

13  
14 We included all ED visits in California from 2005 to 2015, and classified ED visits as  
15  
16 inpatient if the visit resulted in a hospital admission and outpatient if the visit resulted in  
17  
18 treatment-and-release without admission. All observation stays that initially came through the  
19  
20 ED – whether they were admitted to the inpatient setting or discharged directly from the ED –  
21  
22 were captured in our dataset. We designated hospitals as urban or rural based on the  
23  
24 corresponding county listed in the non-public PDD documentation.  
25  
26  
27  
28  
29

## 30 **Patient Involvement**

31  
32 Patients were not involved in the development of the research question, outcome  
33  
34 measures, or study design. We did not actively recruit patients for this study, and the results will  
35  
36 not be disseminated to the study participants as we used unidentified data and have no way of  
37  
38 contacting the patients.  
39  
40  
41  
42  
43

## 44 **Statistical Analysis**

45  
46 We analyzed ED visits and visit rates for significant trends in California from 2005 to  
47  
48 2015 by age group (<5 years, 5-19 years, 20-44 years, 45-64 years, and 65 years and over); sex  
49  
50 (male, female, unknown); race/ethnicity group (non-Hispanic White, non-Hispanic Black,  
51  
52 Hispanic, Other); payer/insurance status (private, Medicare, Medicaid, uninsured/self-pay, other,  
53  
54 unknown); and metropolitan statistical area (rural or urban). Furthermore, we looked at age, sex,  
55  
56  
57  
58  
59  
60

1  
2  
3 race/ethnicity, urban/rural trends by payer/insurance status for a more granular picture of patient  
4  
5 population differences within each insurance group. We obtained International Classification of  
6  
7 Disease, 9th Revision, Clinical Modification (ICD-9-CM) codes for principal hospital discharge  
8  
9 diagnoses for 2005-2014, and categorized them into multi-level diagnoses codes using the  
10  
11 Agency for Healthcare Research and Quality's Clinical Classification Software (CCS) to  
12  
13 examine changes in conditions observed in the ED over time. We clustered 2015 diagnoses into  
14  
15 multi-level CCS categories using single-level CCS categorizations provided in the data, which  
16  
17 accounted for the transition from ICD-9 to ICD-10 coding in October 2015. We performed all  
18  
19 analyses using Stata software (version 14, Stata Corporation, College Station, TX). The  
20  
21 University of California, San Francisco Institutional Review Board approved this study.  
22  
23  
24  
25  
26  
27

## 28 **RESULTS**

29  
30 Between 2005 and 2015, total annual ED visits in California increased by 39.7%  
31  
32 ( $p<0.001$ ), from 10.2 million to 14.2 million (Supplementary Table 1). ED utilization in  
33  
34 California gradually increased across most years in the study period, with two pronounced jumps  
35  
36 from 2008 to 2009 (8.1%) and 2014 to 2015 (6.3%). The number of ED visits grew the most  
37  
38 among patients aged 45-64 (55.8%;  $p<0.001$ ), female patients (42.5%;  $p<0.001$ ), Hispanic  
39  
40 patients (78.4%;  $p<0.001$ ), Medicaid beneficiaries (151.0%;  $p=0.001$ ), and those living in urban  
41  
42 areas (40.5%;  $p<0.001$ ).  
43  
44  
45

46  
47 After adjusting for the 9.3% population growth in California during our study period, we  
48  
49 found an overall 27.8% ( $p<0.001$ ) increase in ED visit rates between 2005 and 2015 (Table 1),  
50  
51 with significant increases among all patient characteristics examined. In 2015, ED visit rates  
52  
53 were the highest among patients aged less than 5 and 65 and over (543 visits and 503 visits per  
54  
55 1,000 California residents aged less than 5 and 65 and over, respectively), non-Hispanic Black  
56  
57  
58  
59  
60

1  
2  
3 patients (703 per 1,000), Medicaid-insured patients (747 per 1,000), and rural residents (501 per  
4  
5 1,000). ED visit rates grew the fastest among patients aged 5-19 (37.4% increase, from 196 to  
6  
7 269 per 1,000) and 45-64 (41.1% increase, from 101 to 142 per 1,000) ( $p<0.001$  for both) – in  
8  
9 particular, a 232% increase among Medicaid-insured 45-64-year-olds (Supplementary Table 2) –  
10  
11 uninsured patients (36.1% increase, from 242 to 330 per 1,000;  $p=0.002$ ), and urban residents  
12  
13 (28.3% increase, from 281 to 361 per 1,000;  $p<0.001$ ). Although non-Hispanic Black patients  
14  
15 had a strikingly higher ED visit rate in 2015, both non-Hispanic Black and Hispanic patients  
16  
17 experienced similar high levels of ED visit rate growth (56.8% increase, from 448 to 703 per  
18  
19 1,000; and 48.8% increase, from 237 to 353 per 1,000, respectively;  $p<0.001$  for both) during the  
20  
21 study period. See Supplementary Tables 3-5 for additional results on ED visits stratified by  
22  
23 insurance groups (privately insured, Medicare insured, and uninsured, respectively).  
24  
25  
26  
27

28  
29 When examining ED discharge and hospital admission trends, the number of ED visits  
30  
31 resulting in a discharge (“treat-and-release”) increased by 44.5%, from 8.6 million to 12.4  
32  
33 million, and the number resulting in a hospital admission increased by 14.2%, from roughly 1.6  
34  
35 million to 1.9 million during the study period. The proportion of ED visits that resulted in a  
36  
37 discharge increased by 3.5% (from 84.0% of ED visits in 2005 to 86.9% in 2015), while the  
38  
39 proportion that resulted in a hospital admission decreased by 18.3% (from 16.0% of ED visits in  
40  
41 2005 to 13.1% in 2015; Figure 1).  
42  
43  
44  
45

### 46 **ED Visit Patient Composition Trends by Payer**

47  
48 Although ED visit rates increased across all payer groups, the proportion of ED visits  
49  
50 from private and uninsured patients decreased by 24.0% (from 35.0% to 26.6%) and 50.1%  
51  
52 (from 15.4% to 7.7%), respectively, while the proportion of ED visits from Medicare- and  
53  
54  
55  
56  
57  
58  
59  
60



1  
2  
3 Medicaid-insured patients increased by 13.1% (from 18.7% to 21.1%) and 79.7% (from 22.9% to  
4  
5 41.1%), respectively, during the study period (Figure 2).

6  
7 We further examined payer composition trends by looking at ED visits resulting in a  
8  
9 hospital admission. The number of ED visits resulting in hospitalization grew for Medicaid- and  
10  
11 Medicare-insured patients by 72.0% and 18.5%, respectively, but declined for privately insured  
12  
13 and uninsured patients by 8.3% and 71.3%, respectively. However, we found that the proportion  
14  
15 of all ED visits resulting in hospitalization reduced across all payer groups, with decreases of  
16  
17 13.6% for the privately insured, 31.4% for the Medicaid-insured, 25.0% for the Medicare-  
18  
19 insured, and 58.8% for the uninsured.  
20  
21  
22  
23  
24  
25

### 26 **ED Visit Trends by CCS Diagnoses**

27  
28 When we analyzed ED visits by multi-level CCS diagnosis groups, we found that the  
29  
30 number of ED visits increased across all CSS diagnoses except for the unclassified conditions  
31  
32 group (Figure 3). The top 3 conditions for which ED visits grew the most included infectious and  
33  
34 parasitic diseases (88.2%), diseases of the blood and blood-forming organs (78.7%), and mental  
35  
36 illness (70.8%). However, the top 3 most prevalent conditions during the study period were  
37  
38 injury and poisoning (20.6%), diseases of the respiratory system (12.8%), and ill-defined  
39  
40 conditions (12.5%).  
41  
42  
43  
44  
45

### 46 **DISCUSSION**

47  
48 Between 2005 and 2015, ED visit rates increased by 27.8% in California, with the  
49  
50 greatest ED visit rate growth among patients aged 5-19 and 45-64 years old, uninsured and  
51  
52 Medicaid-insured patients, non-Hispanic Black and Hispanic patients, and patients living in  
53  
54 urban areas. Despite relatively slower ED visit rate growth trends, the youngest (less than 5  
55  
56  
57  
58  
59  
60

1  
2  
3 years) and elderly (65 and over) patient groups as well as Medicare-insured patients retained  
4  
5 high ED visit rates throughout the study period.  
6

7  
8 Our findings are consistent with previous studies,[8,10,15] and suggest that healthcare  
9  
10 needs tend to exist across the entire age spectrum, albeit for a range of reasons. Patients aged less  
11  
12 than 5 had the highest ED utilization rate as of 2015, outpacing the ED utilization rate for  
13  
14 patients 65 and over. This finding, along with the high ED visit rate growth for patients aged 5-  
15  
16 19, potentially suggests a need for coordinated acute care for the pediatric population, as well as  
17  
18 the need to re-examine the availability and role of EDs equipped to treat children, particularly  
19  
20 among underinsured pediatric patients. On the other hand, while patients aged 45-64 had the  
21  
22 lowest overall ED visit rate during the study period, this group experienced the greatest ED  
23  
24 utilization rate increase. This suggests that patients nearing 65 may have significant health care  
25  
26 needs given prior evidence of sharp increases in healthcare utilization once patients turned 65  
27  
28 years old.[26] Meanwhile, patients aged 65 and over retained high steady ED visit rates.[27] The  
29  
30 consistent high ED utilization rates and current trends in providers who refer elderly patients to  
31  
32 the ED [28,29] suggests a need for improving geriatric care at a systemic level to treat elderly  
33  
34 patients effectively and in a timely manner.  
35  
36  
37  
38  
39

40 Our results revealed that ED utilization rates grew the fastest among non-Hispanic Black  
41  
42 and Hispanic patients. Although we found similar ED visit rates between non-Hispanic White  
43  
44 and Hispanic patients, it is possible that the observed number of ED visits by Hispanic patients is  
45  
46 overall lower because this demographic may be more likely to avoid visiting the ED for reasons  
47  
48 such as language barriers, fear of deportation, and other cultural factors.[30] These trends may  
49  
50 point to substantial gaps in the healthcare system, specifically for racial/ethnic minorities. They  
51  
52 may also suggest that although healthcare access has increased to some extent, disparities still  
53  
54 exist [31] as EDs, acting as “safety nets,” continue to provide increasingly more care.  
55  
56  
57  
58  
59  
60

1  
2  
3 Prior studies have reported high ED utilization rates among Medicaid-insured and  
4  
5 uninsured patients,[8,10,32] consistent with our findings of large ED visit rate increases in these  
6  
7 payer groups. Our findings could reflect a number of trends. First, the use of EDs as “safety nets”  
8  
9 has been previously reported,[33] with one study reporting that more than 50% of all acute visits  
10  
11 by uninsured patients were to emergency physicians, who comprise less than 5% of all  
12  
13 physicians in the US.[34] Second, difficulty in accessing primary care has been widely cited as a  
14  
15 potential source for the increasing trends of ED use by Medicaid-insured patients.[5,32] Despite  
16  
17 initiatives such as the ACA – designed to provide low-income individuals with health care access  
18  
19 – Medicaid-insured patients increasingly seek care in the ED as a result of untimely access to  
20  
21 primary and specialty care.[9] The high use of EDs by Medicaid-insured patients has been  
22  
23 largely attributed to the reluctance of many primary care providers to accept Medicaid insurance  
24  
25 due to low reimbursement rates.[5,35] At the same time, however, increasing literature shows  
26  
27 that even patients with adequate primary care access are often referred to the ED by their primary  
28  
29 care physicians,[14] suggesting that physicians themselves are also relying on the emergency  
30  
31 care system to help diagnose and manage patients. Last, the utilization of EDs over other  
32  
33 ambulatory care venues by patients of low socioeconomic status is influenced not only by  
34  
35 insurance status or affordability, but also by accessibility, availability, perceptions of  
36  
37 accommodation, and high disease burden.[36,37] These factors are important to consider when  
38  
39 exploring potential solutions to improve the accessibility, provision, and quality of care.  
40  
41  
42  
43  
44  
45

46 Despite increasing numbers of ED visits, the proportion of ED visits resulting in inpatient  
47  
48 admissions decreased. Prior studies have indicated that high numbers of complex and urgent  
49  
50 patients are being managed in EDs,[38,39] and the decreases in the proportion of admissions  
51  
52 seen in our study could indicate that patients with complex conditions are being evaluated,  
53  
54 treated, and discharged from the ED rather than being admitted or cared for elsewhere. Although  
55  
56  
57  
58  
59

1  
2  
3 this has potential benefits to healthcare systems, management of high-acuity outpatients in the  
4  
5 ED could further contribute to the demands on EDs.  
6

7  
8 Other changes in ED visit trends included decreases in the proportion of ED visits for  
9  
10 conditions related to injury and poisoning and increases in the proportion of medical conditions,  
11  
12 including infectious and parasitic diseases and mental illness. Consistent with prior evidence of a  
13  
14 decrease in ED visit rates for injuries in California from 2005-2011 but an increase for non-  
15  
16 injury diagnoses,[40] our findings reveal the changing role of the ED in the health care system,  
17  
18 where EDs are treating and providing care for more complex medical conditions. As chronic  
19  
20 illnesses increase in the US[41] and the management of these conditions becomes more complex,  
21  
22 it will become critical to expand services and access to treatments for conditions that drive ED  
23  
24 utilization and demand for emergency care.  
25  
26  
27  
28  
29

### 30 **Limitations**

31  
32  
33 Our study includes several limitations. First, OSHPD collects retrospective, self-reported  
34  
35 data from hospitals, which could introduce potential reporting errors or missing data; however,  
36  
37 hospitals submit routine accuracy checks using OSHPD's Medical Information Reporting for  
38  
39 California (MIRCal) online system, which reduces such errors. Second, our data are limited to  
40  
41 California residents and may limit the generalizability and applicability of our results on a  
42  
43 national or global level, despite California's diverse and high Medicaid-insured population.  
44  
45 Third, US Census Bureau surveys exclude undocumented and homeless populations, as well as  
46  
47 individuals residing in nursing homes, extended-care facilities, prisons, and mental health  
48  
49 facilities. Many of these individuals visit the ED on a frequent basis, and thus ED visit rates  
50  
51 could be overestimated because many of these people are not accounted for in the population  
52  
53 denominator.  
54  
55  
56  
57  
58  
59  
60

## CONCLUSIONS

Our findings suggest that the demand for emergency care continues to rise. ED visit rates in California increased from 2005-2015, across all age groups, and particularly among the uninsured, Medicaid-insured, non-Hispanic Black, Hispanic, and urban-residing patients. Increased ED visit rates by Medicaid-insured and uninsured patients may reflect current limitations in accessing care in other parts of the healthcare system. Furthermore, changes in conditions seen in the ED suggest that patient healthcare needs are becoming increasingly great and complex. Rather than focusing solely on efforts to reduce ED use, policymakers may need to recognize that EDs are playing an increasingly vital role in the provision of care and consider ways to incorporate this changing reality into the delivery of health services.

## **AUTHORS' CONTRIBUTIONS**

RYH and MJN contributed to the conception and design of the study. SS and TJN drafted the manuscript. MJN and JG contributed to the analysis of data. RYH provided supervision. RYH, SS, JG, TJN, and MJN contributed to the interpretation of the data and critically reviewed, revised, and approved the manuscript.

## **ACKNOWLEDGMENTS**

The authors thank the California Office of Statewide Health Planning and Development for their assistance in preparing the datasets used in this project.

## **FUNDING STATEMENT**

This work was supported by the California Health Care Foundation. The sponsor had no role in the design and conduct of the study; collection, management, analysis, and interpretation of the data; preparation, review, or approval of the manuscript; and decision to submit the manuscript for publication.

## **COMPETING INTERESTS STATEMENT**

None declared.

## **ETHICAL APPROVAL**

The University of California, San Francisco Institutional Review Board approved this study.

1  
2  
3  
4  
5  
6  
7  
8  
9  
10  
11  
12  
13  
14  
15  
16  
17  
18  
19  
20  
21  
22  
23  
24  
25  
26  
27  
28  
29  
30  
31  
32  
33  
34  
35  
36  
37  
38  
39  
40  
41  
42  
43  
44  
45  
46  
47  
48  
49  
50  
51  
52  
53  
54  
55  
56  
57  
58  
59  
60

**PATIENT CONSENT**

Not applicable.

**DATA SHARING STATEMENT**

The data are available through the California Office of Statewide Health Planning and Development.

For peer review only

## REFERENCES

1. EMTALA. Emergency Medical Treatment and Active Labor Act of 1985. Pub L No. 99-272, 42 USC §1395dd. 1986.
2. American Hospital Association. Trendwatch chartbook 2016: trends affecting hospitals and health systems. Table 3.3: emergency department visits, emergency department visits per 1,000 persons, and number of emergency departments, 1994-2014. 2016.
3. Skinner HG, Blanchard J, Elixhauser A. Trends in emergency department visits, 2006-2011. HCUP Statistical Brief #179. Rockville, MD: Agency for Healthcare Research and Quality; 2014. <https://www.hcup-us.ahrq.gov/reports/statbriefs/sb179-Emergency-Department-Trends.pdf> (accessed 06 Dec 2017).
4. Emergency Physicians: Anthem Blue Cross Blue Shield policy violates federal law [press release]. Washington: PRNewswire-USNewswire, 16 May 2017. <http://newsroom.acep.org/2017-05-16-Emergency-Physicians-Anthem-Blue-Cross-Blue-Shield-Policy-Violates-Federal-Law> (accessed 06 Dec 2017).
5. Kellermann AL, Weinick RM. Emergency departments, Medicaid costs, and access to primary care — understanding the link. *N Engl J Med* 2012;366:2141-3.
6. Friedman AB, Saloner B, Hsia RY. No place to call home - policies to reduce ED use in Medicaid. *N Engl J Med* 2015;372:2382-5.
7. Flores-Mateo G, Violan-Fors C, Carrillo-Santistevé P, et al. Effectiveness of organizational interventions to reduce emergency department utilization: a systematic review. *PLoS One* 2012;7:e35903.
8. Taubman SL, Allen HL, Wright BJ, et al. Medicaid increases emergency-department use: evidence from Oregon's health insurance experiment. *Science* 2014;343:263-8.



- 1  
2  
3 9. American College of Emergency Physicians. ER visits continue to rise since implementation  
4 of Affordable Care Act. 04 May 2015. [http://newsroom.acep.org/2015-05-04-ER-Visits-](http://newsroom.acep.org/2015-05-04-ER-Visits-Continue-to-Rise-Since-Implementation-of-Affordable-Care-Act)  
5  
6 [Continue-to-Rise-Since-Implementation-of-Affordable-Care-Act](http://newsroom.acep.org/2015-05-04-ER-Visits-Continue-to-Rise-Since-Implementation-of-Affordable-Care-Act) (accessed 06 Dec 2017).  
7  
8  
9  
10 10. McConville S, Lee H. Emergency department care in California: who uses it and why? San  
11 Francisco, CA: The Public Policy Institute of California 10(1); 2008.  
12  
13 <http://www.ppic.org/publication/emergency-department-care-in-california-who-uses-it-and-why/>  
14 (accessed 06 Dec 2017).  
15  
16  
17  
18  
19 11. HCUP Fast Stats, Healthcare Cost and Utilization Project. California: All ED visits (adults  
20 and pediatric) by expected payer. Rockville, MD: Agency for Healthcare Research and Quality;  
21  
22 2017. <https://www.hcup-us.ahrq.gov/faststats/StatePayerEDServlet?state1=CA> (accessed 06 Dec  
23  
24 2017).  
25  
26  
27  
28 12. Garthwaite C, Gross T, Notowidigdo M, et al. Insurance expansion and hospital emergency  
29 department access: evidence from the Affordable Care Act. *Ann Intern Med* 2017;166:172-9.  
30  
31  
32  
33 13. Sommers BD, Blendon RJ, Orav EJ, et al. Changes in utilization and health among low-  
34 income adults after Medicaid expansion or expanded private insurance. *JAMA Intern Med*  
35 2016;176:1501-9.  
36  
37  
38  
39 14. Finkelstein AN, Taubman SL, Allen HL, et al. Effect of Medicaid coverage on ED use —  
40 further evidence from Oregon’s experiment. *New Engl J Med* 2016;375:1505-7.  
41  
42  
43  
44 15. Barakat MT, Mithal A, Huang RJ, et al. Affordable Care Act and healthcare delivery: a  
45 comparison of California and Florida hospitals and emergency departments. *PLoS One*  
46 2017;12:e0182346.  
47  
48  
49  
50 16. Sommers BD, Simon K. Health insurance and emergency department use - a complex  
51 relationship. *N Engl J Med* 2017;376:1708-11.  
52  
53  
54  
55  
56  
57  
58  
59  
60

- 1  
2  
3 17. The Henry J. Kaiser Family Foundation. The California health care landscape. 2015.  
4  
5 <http://kff.org/health-reform/fact-sheet/the-california-health-care-landscape/>. (accessed 01 Mar  
6  
7 2018).  
8  
9  
10 18. Hospital Annual Financial Data 2005-2015. California Office of Statewide Health Planning  
11  
12 and Development. 2016.  
13  
14 [http://www.oshpd.ca.gov/hid/Products/Hospitals/AnnFinanData/SubSets/SelectedData/default.as](http://www.oshpd.ca.gov/hid/Products/Hospitals/AnnFinanData/SubSets/SelectedData/default.asp)  
15  
16 [p](http://www.oshpd.ca.gov/hid/Products/Hospitals/AnnFinanData/SubSets/SelectedData/default.asp). (accessed 01 Sept 2016).  
17  
18  
19 19. Hospital Annual Utilization Data 2005-2015. California Office of Statewide Health Planning  
20  
21 and Development. 2016. <https://www.oshpd.ca.gov/HID/Hospital-Utilization.html>. (accessed 01  
22  
23 Sept 2016).  
24  
25  
26 20. Table 2. Intercensal estimates of the resident population by sex and age for California: April  
27  
28 1, 2000 to July 1, 2010. U.S. Census Bureau, Population Division. 2012.  
29  
30 <https://www.census.gov/data/tables/time-series/demo/popest/intercensal-2000-2010-state.html>  
31  
32 (accessed 06 Dec 2017).  
33  
34  
35 21. Annual estimates of the resident population for selected age groups by sex for the United  
36  
37 States, states, counties and Puerto Rico Commonwealth and Municipios: April 1, 2010 to July 1,  
38  
39 2015. U.S. Census Bureau, Population Division. 2016.  
40  
41 <https://factfinder.census.gov/faces/tableservices/jsf/pages/productview.xhtml?src=bkmk>  
42  
43 (accessed 06 Dec 2017).  
44  
45  
46 22. Health insurance coverage status and type of coverage by state and age for all people: 2005-  
47  
48 2011. Current Population Survey, 2006-2012 Annual Social and Economic Supplement. U.S.  
49  
50 Census Bureau. <https://www.census.gov/data/tables/time-series/demo/income-poverty/cps->  
51  
52 [hi.html](https://www.census.gov/data/tables/time-series/demo/income-poverty/cps-hi.html) (accessed 06 Dec 2017).  
53  
54  
55  
56  
57  
58  
59  
60

- 1  
2  
3 23. Health insurance coverage status and type of coverage by state and age for all people: 2013-  
4 2015. American Community Survey, 2013-2015. U.S. Census.  
5  
6  
7 24. Race/ethnic population with age and sex detail, 2000-2010. State of California, Department  
8 of Finance. 2012. [http://www.dof.ca.gov/Forecasting/Demographics/Estimates/Race-](http://www.dof.ca.gov/Forecasting/Demographics/Estimates/Race-Ethnic/2000-2010/)  
9 [Ethnic/2000-2010/](http://www.dof.ca.gov/Forecasting/Demographics/Estimates/Race-Ethnic/2000-2010/) (accessed 06 Dec 2017).  
10  
11  
12  
13  
14 25. Annual estimates of the resident population by sex, age, race, and Hispanic origin for the  
15 United States and States: April 1, 2010 to July 1, 2015. U.S. Census Bureau, Population  
16 Division. 2016.  
17 <https://factfinder.census.gov/faces/tableservices/jsf/pages/productview.xhtml?src=bkmk>  
18 (accessed 06 Dec 2017).  
19  
20  
21  
22  
23 26. Card D, Dobkin C, Maestas N. The impact of nearly universal insurance coverage on health  
24 care utilization: evidence from Medicare. *Am Econ Rev* 2008;98:2242-58.  
25  
26  
27 27. Samaras N, Chevalley T, Samaras D, et al. Older patients in the emergency department: a  
28 review. *Ann Emerg Med* 2010;56:261-9.  
29  
30  
31 28. Greenwald PW, Estevez RM, Clark S, et al. The ED as the primary source of hospital  
32 admission for older (but not younger) adults. *Am J Emerg Med* 2016;34:943-7.  
33  
34  
35 29. Schuur JD, Venkatesh AK. The growing role of emergency departments in hospital  
36 admissions. *N Engl J Med* 2012;367:391-3.  
37  
38  
39 30. Perez-Escamilla R, Garcia J, Song D. Health care access among Hispanic Immigrants:  
40 ¿Alguien esta escuchando [is anybody listening?]. *NAPA bulletin* 2010;34:47-67.  
41  
42  
43 31. Artiga S, Young K, Garfield R, et al. Racial and ethnic disparities in access to and utilization  
44 of care among insured adults. The Henry J. Kaiser Family Foundation; 2015.  
45  
46  
47  
48  
49  
50  
51  
52  
53  
54  
55  
56  
57  
58  
59  
60

1  
2  
3 [https://www.kff.org/disparities-policy/issue-brief/racial-and-ethnic-disparities-in-access-to-and-  
5 utilization-of-care-among-insured-adults/](https://www.kff.org/disparities-policy/issue-brief/racial-and-ethnic-disparities-in-access-to-and-<br/>4 utilization-of-care-among-insured-adults/) (accessed 06 Dec 2017).  
6

7  
8 32. Hsia RY, Brownell J, Wilson S, et al. Trends in adult emergency department visits in  
9 California by insurance status, 2005-2010. *JAMA* 2013;310:1181-3.  
10

11  
12 33. Burt C, IE A. Characteristics of emergency departments serving high volumes of safety-net  
13 patients: United States, 2000. *Vital health Stat 13*. 2004:1-16.  
14

15  
16 34. Pitts SR, Carrier ER, Rich EC, et al. Where Americans get acute care: increasingly, it's not at  
17 their doctor's office. *Health Aff (Millwood)* 2010;29:1620-9.  
18

19  
20 35. Decker SL. In 2011 nearly one-third of physicians said they would not accept new Medicaid  
21 patients, but rising fees may help. *Health Aff (Millwood)* 2012;31:1673-9.  
22

23  
24 36. Kangovi S, Barg FK, Carter T, et al. Understanding why patients of low socioeconomic  
25 status prefer hospitals over ambulatory care. *Health Aff (Millwood)* 2013;32:1196-203.  
26

27  
28 37. Hudon C, Sanche S, Haggerty JL. Personal characteristics and experience of primary care  
29 predicting frequent use of emergency department: a prospective cohort study. *PLoS One*  
30 2016;11:e0157489.  
31

32  
33 38. Herring AA, Johnson B, Ginde A, et al. High-intensity emergency department visits  
34 increased in California, 2002-09. *Health Aff (Millwood)* 2013;32:1811-19.  
35

36  
37 39. Burke LG, Wild RC, Orav EJ, et al. Are trends in billing for high-intensity emergency care  
38 explained by changes in services provided in the emergency department? An observational study  
39 among US Medicare beneficiaries. *BMJ Open* 2018;8:e019357.  
40

41  
42 40. Hsia RY, Nath JB, Baker LC. California emergency department visit rates for medical  
43 conditions increased while visit rates for injuries fell, 2005-11. *Health Aff (Millwood)*  
44 2015;34:621-6.  
45  
46  
47  
48  
49  
50  
51  
52  
53  
54  
55  
56  
57  
58  
59  
60

1  
2  
3 41. Office of Disease Prevention and Health Promotion. General health status: chronic disease  
4 prevalence 2016. <https://www.healthypeople.gov/2020/about/foundation-health->  
5 [measures/General-Health-Status - chronic](https://www.healthypeople.gov/2020/about/foundation-health-) (accessed 06 Dec 2017).  
6  
7  
8  
9  
10  
11  
12  
13  
14  
15  
16  
17  
18  
19  
20  
21  
22  
23  
24  
25  
26  
27  
28  
29  
30  
31  
32  
33  
34  
35  
36  
37  
38  
39  
40  
41  
42  
43  
44  
45  
46  
47  
48  
49  
50  
51  
52  
53  
54  
55  
56  
57  
58  
59  
60

For peer review only

## FIGURE LEGEND

### Figure 1

*Caption:* Proportion of California emergency department visits resulting in admission vs. discharge, 2005-2015

*Source:* Authors' analysis of Emergency Discharge Data and Patient Discharge Data from the California Office of Statewide Health Planning and Development, 2005-2015.

### Figure 2

*Caption:* Proportion of California emergency department visits by payer, 2005-2015

*Source:* Authors' analysis of Emergency Discharge Data and Patient Discharge Data from the California Office of Statewide Health Planning and Development, 2005-2015

### Figure 3

*Caption:* California emergency department visits by diagnosis, 2005 and 2015

*Source:* Authors' analysis of Emergency Discharge Data from the California Office of Statewide Health Planning and Development, 2005 and 2015

**Table 1. California emergency department visit rates (per 1000 population), 2005-2015**

|                            | 2005  | 2006  | 2007  | 2008  | 2009  | 2010  | 2011  | 2012  | 2013  | 2014  | 2015  | % Change | P-value |
|----------------------------|-------|-------|-------|-------|-------|-------|-------|-------|-------|-------|-------|----------|---------|
| <b>Total ED visit rate</b> | 284.3 | 282.4 | 289.0 | 294.4 | 315.3 | 309.8 | 317.3 | 326.0 | 331.1 | 344.9 | 363.5 | 27.8%    | <0.001  |
| <b>Age group</b>           |       |       |       |       |       |       |       |       |       |       |       |          |         |
| <5                         | 455.4 | 448.4 | 474.8 | 479.1 | 544.5 | 514.3 | 510.3 | 508.8 | 518.5 | 512.9 | 542.5 | 19.1%    | <0.001  |
| 5-19                       | 195.7 | 191.3 | 196.7 | 200.4 | 234.0 | 215.8 | 223.4 | 227.3 | 239.0 | 250.1 | 268.9 | 37.4%    | <0.001  |
| 20-44                      | 266.9 | 264.9 | 270.7 | 274.5 | 291.9 | 290.0 | 296.3 | 306.0 | 309.2 | 328.6 | 346.4 | 29.8%    | <0.001  |
| 45-64                      | 100.7 | 102.4 | 106.1 | 110.5 | 116.2 | 118.1 | 121.8 | 127.0 | 128.3 | 135.5 | 142.1 | 41.1%    | <0.001  |
| 65+                        | 461.0 | 464.1 | 464.0 | 470.3 | 471.5 | 474.8 | 485.9 | 490.6 | 486.6 | 486.2 | 503.0 | 9.1%     | <0.001  |
| <b>Sex</b>                 |       |       |       |       |       |       |       |       |       |       |       |          |         |
| Male                       | 266.4 | 264.7 | 270.1 | 273.6 | 291.7 | 285.9 | 292.5 | 300.1 | 305.1 | 317.2 | 336.0 | 26.2%    | <0.001  |
| Female                     | 300.1 | 299.9 | 307.7 | 315.0 | 338.7 | 333.3 | 341.7 | 351.6 | 356.7 | 372.2 | 390.6 | 30.1%    | <0.001  |
| <b>Race/Ethnicity</b>      |       |       |       |       |       |       |       |       |       |       |       |          |         |
| NH White                   | 294.5 | 299.4 | 308.8 | 315.3 | 336.8 | 339.6 | 347.9 | 358.2 | 357.4 | 366.8 | 381.1 | 29.4%    | <0.001  |
| NH Black                   | 448.2 | 469.0 | 497.7 | 524.7 | 581.5 | 593.7 | 615.1 | 642.3 | 646.9 | 675.1 | 702.9 | 56.8%    | <0.001  |
| Hispanic                   | 237.1 | 238.9 | 249.5 | 259.5 | 288.8 | 278.1 | 287.8 | 296.8 | 310.6 | 328.0 | 352.9 | 48.8%    | <0.001  |
| Other                      | 185.3 | 191.6 | 199.8 | 199.9 | 214.7 | 211.3 | 213.6 | 215.7 | 217.6 | 230.2 | 249.2 | 34.4%    | <0.001  |
| <b>Payer</b>               |       |       |       |       |       |       |       |       |       |       |       |          |         |
| Private                    | 171.0 | 166.2 | 168.9 | 174.7 | 196.9 | 180.1 | 186.5 | 181.8 | 186.1 | 184.6 | 181.4 | 6.1%     | 0.012   |
| Medicaid                   | 580.9 | 574.7 | 596.5 | 605.6 | 611.2 | 638.0 | 623.6 | 654.1 | 645.2 | 731.6 | 747.3 | 28.6%    | <0.001  |
| Medicare                   | 459.2 | 490.6 | 492.0 | 501.3 | 497.7 | 496.4 | 516.7 | 539.1 | 529.8 | 528.7 | 536.9 | 16.9%    | <0.001  |
| Uninsured/self-pay         | 242.2 | 251.5 | 263.6 | 255.8 | 249.0 | 254.4 | 253.5 | 278.9 | 293.8 | 290.8 | 329.7 | 36.1%    | 0.002   |
| <b>MSA</b>                 |       |       |       |       |       |       |       |       |       |       |       |          |         |
| Urban                      | 281.0 | 279.1 | 286.0 | 291.5 | 312.6 | 307.2 | 314.8 | 323.6 | 328.5 | 342.3 | 360.6 | 28.3%    | <0.001  |
| Rural                      | 425.7 | 421.8 | 418.7 | 419.9 | 435.1 | 425.0 | 429.0 | 434.7 | 451.0 | 466.3 | 500.8 | 17.6%    | 0.010   |

Note: ED visit rate denominator includes the population of the corresponding characteristic (e.g. ED visits by male patients in given year/total male population in given year in CA).

1  
2  
3  
4  
5  
6  
7  
8  
9  
10  
11  
12  
13  
14  
15  
16  
17  
18  
19  
20  
21  
22  
23  
24  
25  
26  
27  
28  
29  
30  
31  
32  
33  
34  
35  
36  
37  
38  
39  
40  
41  
42  
43  
44  
45  
46  
47  
48  
49  
50  
51  
52  
53  
54  
55  
56  
57  
58  
59  
60

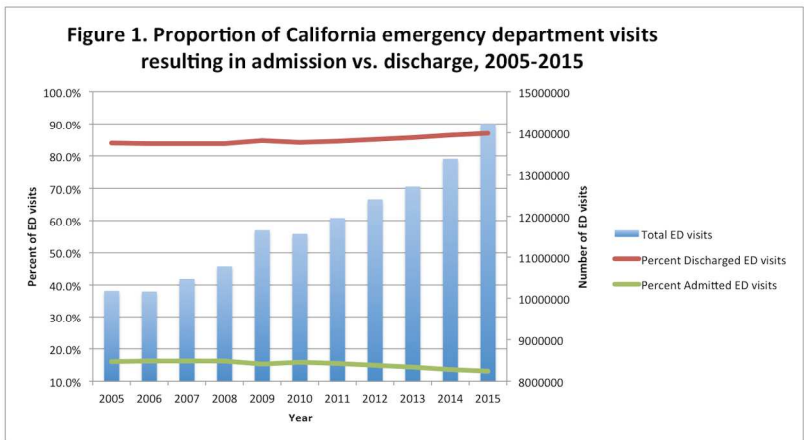

Figure 1. Proportion of California emergency department visits resulting in admission vs. discharge, 2005-2015

279x215mm (300 x 300 DPI)

View only



1  
2  
3  
4  
5  
6  
7  
8  
9  
10  
11  
12  
13  
14  
15  
16  
17  
18  
19  
20  
21  
22  
23  
24  
25  
26  
27  
28  
29  
30  
31  
32  
33  
34  
35  
36  
37  
38  
39  
40  
41  
42  
43  
44  
45  
46  
47  
48  
49  
50  
51  
52  
53  
54  
55  
56  
57  
58  
59  
60

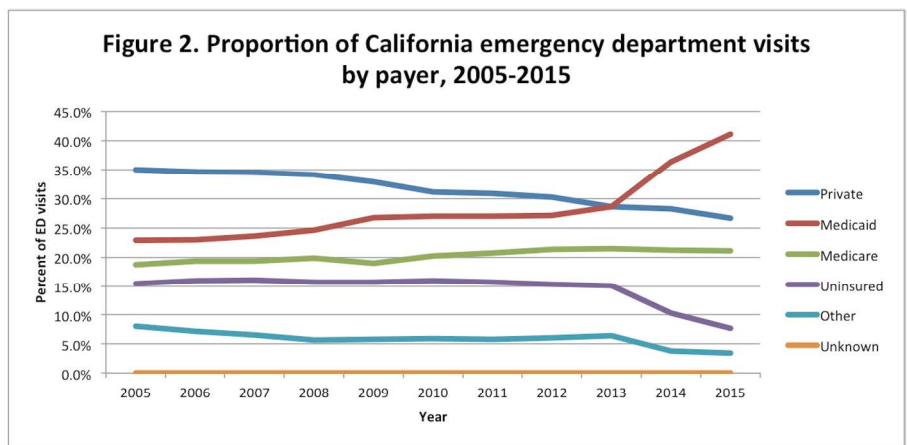

Figure 2. Proportion of California emergency department visits by payer, 2005-2015

215x279mm (300 x 300 DPI)

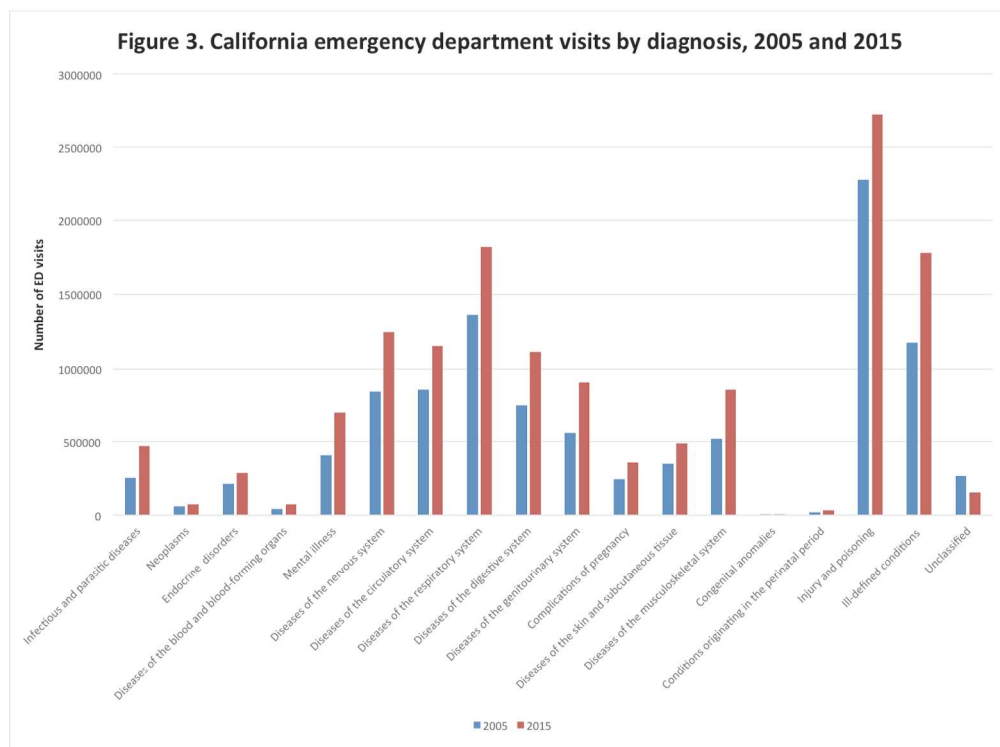

Figure 3. California emergency department visits by diagnosis, 2005 and 2015

279x215mm (300 x 300 DPI)

View only

## SUPPLEMENTARY MATERIALS

Supplementary Table 1. Descriptive characteristics of California emergency department visits, 2005-2015

| Characteristic         | 2005     | 2006     | 2007     | 2008     | 2009     | 2010     | 2011     | 2012     | 2013     | 2014     | 2015     | % Change | P-value |
|------------------------|----------|----------|----------|----------|----------|----------|----------|----------|----------|----------|----------|----------|---------|
| <b>Total ED visits</b> | 10187048 | 10172173 | 10476830 | 10777904 | 11654758 | 11564940 | 11960916 | 12407787 | 12717983 | 13379768 | 14228961 | 39.7%    | <0.001  |
| <b>Age group</b>       |          |          |          |          |          |          |          |          |          |          |          |          |         |
| <5                     | 1163718  | 1138675  | 1208600  | 1227060  | 1385661  | 1301325  | 1293277  | 1279965  | 1296007  | 1284076  | 1360921  | 16.9%    | 0.002   |
| 5-19                   | 1543281  | 1508767  | 1548365  | 1580477  | 1850406  | 1704412  | 1748506  | 1768990  | 1851782  | 1926985  | 2060762  | 33.5%    | <0.001  |
| 20-44                  | 3540709  | 3503045  | 3567013  | 3621196  | 3858230  | 3857008  | 3984261  | 4158612  | 4238892  | 4546171  | 4817840  | 36.1%    | <0.001  |
| 45-64                  | 2169625  | 2224611  | 2321347  | 2441078  | 2596714  | 2671541  | 2794199  | 2939632  | 2997090  | 3197982  | 3379431  | 55.8%    | <0.001  |
| 65+                    | 1769715  | 1797075  | 1831505  | 1908093  | 1963747  | 2030654  | 2140673  | 2260588  | 2334212  | 2424554  | 2610007  | 47.5%    | <0.001  |
| <b>Sex</b>             |          |          |          |          |          |          |          |          |          |          |          |          |         |
| Male                   | 4749677  | 4744206  | 4870474  | 4982441  | 5361116  | 5305158  | 5478365  | 5674693  | 5821163  | 6111803  | 6533740  | 37.6%    | <0.001  |
| Female                 | 5400871  | 5426867  | 5605380  | 5794994  | 6293259  | 6259489  | 6482298  | 6732782  | 6896402  | 7267461  | 7694688  | 42.5%    | <0.001  |
| Unknown                | 36498    | 1092     | 973      | 463      | 383      | 290      | 251      | 310      | 418      | 504      | 518      | -98.6%   | 0.243   |
| <b>Race/Ethnicity</b>  |          |          |          |          |          |          |          |          |          |          |          |          |         |
| NH White               | 4629083  | 4678727  | 4803242  | 4882971  | 5136236  | 5101499  | 5215676  | 5364074  | 5343623  | 5473429  | 5670856  | 22.5%    | <0.001  |
| NH Black               | 995223   | 1039629  | 1103005  | 1163257  | 1282527  | 1298439  | 1349509  | 1413949  | 1427593  | 1497705  | 1566555  | 57.4%    | <0.001  |
| Hispanic               | 3003407  | 3087315  | 3289467  | 3489075  | 3983295  | 3913063  | 4120055  | 4314009  | 4580423  | 4911172  | 5358365  | 78.4%    | <0.001  |
| Other                  | 853928   | 897019   | 952814   | 971168   | 1060702  | 1086787  | 1123314  | 1160613  | 1200721  | 1303590  | 1447204  | 69.5%    | <0.001  |
| <b>Payer</b>           |          |          |          |          |          |          |          |          |          |          |          |          |         |
| Private                | 3568181  | 3524078  | 3607646  | 3671131  | 3831600  | 3596830  | 3682133  | 3749377  | 3635780  | 3781082  | 3788784  | 6.2%     | 0.002   |
| Medicaid               | 2330998  | 2328948  | 2475271  | 2652643  | 3114505  | 3117815  | 3229952  | 3362952  | 3629446  | 4858001  | 5849956  | 151.0%   | 0.001   |
| Medicare               | 1901449  | 1961387  | 2021499  | 2136053  | 2213792  | 2329984  | 2470110  | 2642609  | 2728514  | 2839188  | 3002826  | 57.9%    | <0.001  |
| Uninsured/self-pay     | 1569042  | 1621182  | 1677550  | 1697604  | 1823444  | 1838886  | 1882198  | 1892743  | 1909953  | 1386455  | 1093733  | -30.3%   | 0.527   |
| Other                  | 813974   | 734799   | 691266   | 617190   | 669627   | 679615   | 694036   | 757560   | 810812   | 511859   | 488805   | -39.9%   | 0.112   |
| Unknown                | 3404     | 1779     | 3598     | 3283     | 1790     | 1810     | 2487     | 2546     | 3478     | 3183     | 4857     | 42.7%    | 0.307   |
| <b>MSA</b>             |          |          |          |          |          |          |          |          |          |          |          |          |         |
| Urban                  | 9833448  | 9820399  | 10126757 | 10425976 | 11289497 | 11207639 | 11601631 | 12046167 | 12345194 | 12994568 | 13814543 | 40.5%    | <0.001  |
| Rural                  | 353600   | 351774   | 350073   | 351928   | 365261   | 357301   | 359285   | 361620   | 372789   | 385200   | 414418   | 17.2%    | 0.010   |

**Supplementary Table 2. California emergency department visits, 2005-2015 – Medicaid insured**

|                         | 2005    | 2006    | 2007    | 2008    | 2009    | 2010    | 2011    | 2012    | 2013    | 2014    | 2015    | % Change |
|-------------------------|---------|---------|---------|---------|---------|---------|---------|---------|---------|---------|---------|----------|
| <b>Age group, years</b> |         |         |         |         |         |         |         |         |         |         |         |          |
| <5                      | 542614  | 544552  | 593483  | 628214  | 747939  | 717052  | 718256  | 724611  | 768987  | 780620  | 888449  | 63.73%   |
| 5-19                    | 522055  | 514867  | 545227  | 586634  | 747137  | 710344  | 745759  | 776316  | 903245  | 1009845 | 1190903 | 128.12%  |
| 20-44                   | 793956  | 788866  | 824338  | 878460  | 1010731 | 1054531 | 1098763 | 1159400 | 1216910 | 1860400 | 2327443 | 193.15%  |
| 45-64                   | 402904  | 413617  | 441945  | 484342  | 532408  | 557115  | 590926  | 625197  | 658112  | 1115845 | 1337561 | 231.98%  |
| 65+                     | 69469   | 67046   | 70278   | 74993   | 76290   | 78773   | 76248   | 77428   | 82192   | 91291   | 105600  | 52.01%   |
| <b>Sex</b>              |         |         |         |         |         |         |         |         |         |         |         |          |
| Male                    | 957166  | 949817  | 1012699 | 1085992 | 1281902 | 1274150 | 1320155 | 1376332 | 1501034 | 2129754 | 2598751 | 171.50%  |
| Female                  | 1371554 | 1379005 | 1462442 | 1566587 | 1832524 | 1843597 | 1909759 | 1986582 | 2128339 | 2728127 | 3251043 | 137.03%  |
| <b>Race/Ethnicity</b>   |         |         |         |         |         |         |         |         |         |         |         |          |
| White                   | 731384  | 719852  | 754567  | 794179  | 895803  | 906345  | 922269  | 941378  | 960099  | 1382263 | 1669637 | 128.28%  |
| Black                   | 308077  | 319736  | 342370  | 377544  | 432888  | 438186  | 457551  | 482857  | 508968  | 680050  | 772846  | 150.86%  |
| Hispanic                | 1048204 | 1060758 | 1151617 | 1254527 | 1534361 | 1511196 | 1590293 | 1676984 | 1866746 | 2389237 | 2903001 | 176.95%  |
| Other                   | 181239  | 181922  | 188889  | 188165  | 218784  | 232492  | 232486  | 235241  | 257996  | 360311  | 464135  | 156.09%  |
| Unknown                 | 62094   | 46680   | 37828   | 38228   | 32669   | 29596   | 27353   | 26492   | 35637   | 46140   | 40337   | -35.04%  |

**Supplementary Table 3. California emergency department visits, 2005-2015 – privately insured**

|                         | 2005    | 2006    | 2007    | 2008    | 2009    | 2010    | 2011    | 2012    | 2013    | 2014    | 2015    | % Change |
|-------------------------|---------|---------|---------|---------|---------|---------|---------|---------|---------|---------|---------|----------|
| <b>Age group, years</b> |         |         |         |         |         |         |         |         |         |         |         |          |
| <5                      | 429459  | 408964  | 425124  | 430059  | 459516  | 418544  | 410245  | 391188  | 361352  | 340709  | 323370  | -24.70%  |
| 5-19                    | 708116  | 687035  | 692650  | 705363  | 793381  | 711824  | 723207  | 711686  | 669511  | 657252  | 638977  | -9.76%   |
| 20-44                   | 1346838 | 1326662 | 1345311 | 1351430 | 1363911 | 1281028 | 1337662 | 1387663 | 1362165 | 1460033 | 1466015 | 8.85%    |
| 45-64                   | 937683  | 950346  | 983027  | 1011740 | 1036109 | 1016319 | 1034170 | 1078507 | 1056692 | 1130772 | 1157000 | 23.39%   |
| 65+                     | 146085  | 151071  | 161534  | 172539  | 178683  | 169115  | 176849  | 180333  | 186060  | 192316  | 203422  | 39.25%   |
| <b>Sex</b>              |         |         |         |         |         |         |         |         |         |         |         |          |
| Male                    | 1663208 | 1644771 | 1683651 | 1703166 | 1770583 | 1651551 | 1690084 | 1709483 | 1652877 | 1712209 | 1737064 | 4.44%    |
| Female                  | 1900535 | 1878899 | 1923691 | 1967771 | 2060874 | 1945181 | 1991951 | 2039774 | 1982812 | 2068747 | 2051590 | 7.95%    |
| <b>Race/Ethnicity</b>   |         |         |         |         |         |         |         |         |         |         |         |          |
| White                   | 1735384 | 1764498 | 1829347 | 1838610 | 1889460 | 1763218 | 1787345 | 1804017 | 1742043 | 1764406 | 1728905 | -0.37%   |
| Black                   | 259335  | 274790  | 290607  | 294616  | 314387  | 301938  | 312298  | 322555  | 305612  | 308854  | 303153  | 16.90%   |
| Hispanic                | 819647  | 859756  | 926181  | 981879  | 1087422 | 1016798 | 1064338 | 1094322 | 1066446 | 1144353 | 1166619 | 42.33%   |
| Other                   | 330650  | 366942  | 401212  | 413098  | 446058  | 433656  | 447306  | 456385  | 449984  | 479157  | 506248  | 53.11%   |
| Unknown                 | 423165  | 258092  | 160299  | 142928  | 94273   | 81220   | 70846   | 72098   | 71695   | 84312   | 83859   | -80.18%  |

**Supplementary Table 4. Emergency department visits, 2005-2015 – Medicare insured**

|                         | 2005    | 2006    | 2007    | 2008    | 2009    | 2010    | 2011    | 2012    | 2013    | 2014    | 2015    | % Change |
|-------------------------|---------|---------|---------|---------|---------|---------|---------|---------|---------|---------|---------|----------|
| <b>Age group, years</b> |         |         |         |         |         |         |         |         |         |         |         |          |
| <5                      | 8243    | 4200    | 5373    | 6251    | 5090    | 10439   | 10503   | 11613   | 13680   | 14754   | 12550   | 52.25%   |
| 5-19                    | 10797   | 6279    | 6593    | 8337    | 7945    | 12708   | 14009   | 16263   | 19637   | 22658   | 21148   | 95.87%   |
| 20-44                   | 143152  | 140675  | 148033  | 160620  | 167879  | 179749  | 188514  | 205036  | 206723  | 215200  | 212123  | 48.18%   |
| 45-64                   | 275977  | 295922  | 318067  | 346547  | 370181  | 393129  | 420238  | 459603  | 477958  | 505885  | 522212  | 89.22%   |
| 65+                     | 1463280 | 1514311 | 1543433 | 1614298 | 1662697 | 1733959 | 1836846 | 1950094 | 2010516 | 2080691 | 2234793 | 52.72%   |
| <b>Sex</b>              |         |         |         |         |         |         |         |         |         |         |         |          |
| Male                    | 821355  | 844714  | 867868  | 917990  | 950000  | 1006743 | 1066235 | 1142955 | 1189472 | 1240239 | 1318555 | 60.53%   |
| Female                  | 1077719 | 1116566 | 1153548 | 1218014 | 1263757 | 1323213 | 1403845 | 1499617 | 1538996 | 1598904 | 1684217 | 56.28%   |
| <b>Race/Ethnicity</b>   |         |         |         |         |         |         |         |         |         |         |         |          |
| White                   | 1222354 | 1258172 | 1299775 | 1346473 | 1382103 | 1441869 | 1510711 | 1599925 | 1624635 | 1663996 | 1742676 | 42.57%   |
| Black                   | 159263  | 170620  | 181588  | 198505  | 211765  | 224865  | 238157  | 257281  | 264718  | 277381  | 290440  | 82.37%   |
| Hispanic                | 297507  | 315033  | 334522  | 371907  | 399036  | 431504  | 469415  | 517413  | 549923  | 583293  | 626736  | 110.66%  |
| Other                   | 156948  | 164791  | 176161  | 190060  | 197222  | 212005  | 231632  | 249920  | 268873  | 285875  | 315090  | 100.76%  |
| Unknown                 | 65377   | 52771   | 29453   | 29108   | 23666   | 19741   | 20195   | 18070   | 20365   | 28643   | 27884   | -57.35%  |

**Supplementary Table 5. Emergency department visits 2005-2015 – uninsured**

|                         | 2005   | 2006   | 2007   | 2008   | 2009   | 2010    | 2011    | 2012    | 2013    | 2014   | 2015   | % Change |
|-------------------------|--------|--------|--------|--------|--------|---------|---------|---------|---------|--------|--------|----------|
| <b>Age group, years</b> |        |        |        |        |        |         |         |         |         |        |        |          |
| <5                      | 115388 | 120322 | 125362 | 114960 | 120588 | 107766  | 107416  | 105162  | 106741  | 101823 | 95770  | -17.00%  |
| 5-19                    | 199444 | 209014 | 216387 | 206858 | 222832 | 199173  | 194820  | 189107  | 189898  | 165966 | 143520 | -28.04%  |
| 20-44                   | 848935 | 887578 | 913148 | 931697 | 996065 | 1015494 | 1030280 | 1055437 | 1072956 | 777655 | 587183 | -30.83%  |
| 45-64                   | 346667 | 368433 | 385732 | 411485 | 451282 | 483683  | 515769  | 509668  | 504880  | 303459 | 227679 | -34.32%  |
| 65+                     | 58608  | 35835  | 36921  | 32604  | 32677  | 32770   | 33913   | 33369   | 35478   | 37552  | 39581  | -32.46%  |
| <b>Sex</b>              |        |        |        |        |        |         |         |         |         |        |        |          |
| Male                    | 859641 | 890163 | 912620 | 922018 | 984241 | 994896  | 1018562 | 1026193 | 1028873 | 748368 | 603828 | -29.76%  |
| Female                  | 705696 | 730669 | 764579 | 775460 | 839104 | 843907  | 863567  | 866453  | 880913  | 637901 | 489743 | -30.60%  |
| <b>Race/Ethnicity</b>   |        |        |        |        |        |         |         |         |         |        |        |          |
| White                   | 593788 | 617404 | 649223 | 648562 | 697406 | 709652  | 710073  | 713594  | 695377  | 459614 | 335463 | -43.50%  |
| Black                   | 178541 | 196121 | 209552 | 221673 | 242739 | 252220  | 260977  | 257628  | 244939  | 171578 | 137722 | -22.86%  |
| Hispanic                | 584084 | 626675 | 646508 | 659205 | 719615 | 712070  | 742101  | 745133  | 795756  | 610154 | 490429 | -16.03%  |
| Other                   | 112259 | 119253 | 125578 | 125144 | 135331 | 141106  | 145983  | 148282  | 146588  | 120039 | 105257 | -6.24%   |
| Unknown                 | 100370 | 61729  | 46689  | 43020  | 28353  | 23838   | 23064   | 28106   | 27293   | 25070  | 24862  | -75.23%  |

**STROBE 2007 (v4) checklist of items to be included in reports of observational studies in epidemiology\***  
**Checklist for cohort, case-control, and cross-sectional studies (combined)**

| Section/Topic             | Item # | Recommendation                                                                                                                                                                                                                                                                                                                                                                                                                                                         | Reported on page # |
|---------------------------|--------|------------------------------------------------------------------------------------------------------------------------------------------------------------------------------------------------------------------------------------------------------------------------------------------------------------------------------------------------------------------------------------------------------------------------------------------------------------------------|--------------------|
| Title and abstract        | 1      | (a) Indicate the study's design with a commonly used term in the title or the abstract                                                                                                                                                                                                                                                                                                                                                                                 | 1                  |
|                           |        | (b) Provide in the abstract an informative and balanced summary of what was done and what was found                                                                                                                                                                                                                                                                                                                                                                    | 2                  |
| <b>Introduction</b>       |        |                                                                                                                                                                                                                                                                                                                                                                                                                                                                        |                    |
| Background/rationale      | 2      | Explain the scientific background and rationale for the investigation being reported                                                                                                                                                                                                                                                                                                                                                                                   | 4-5                |
| Objectives                | 3      | State specific objectives, including any pre-specified hypotheses                                                                                                                                                                                                                                                                                                                                                                                                      | 5                  |
| <b>Methods</b>            |        |                                                                                                                                                                                                                                                                                                                                                                                                                                                                        |                    |
| Study design              | 4      | Present key elements of study design early in the paper                                                                                                                                                                                                                                                                                                                                                                                                                | 5-6                |
| Setting                   | 5      | Describe the setting, locations, and relevant dates, including periods of recruitment, exposure, follow-up, and data collection                                                                                                                                                                                                                                                                                                                                        | 5-6                |
| Participants              | 6      | (a) <i>Cohort study</i> —Give the eligibility criteria, and the sources and methods of selection of participants. Describe methods of follow-up<br><i>Case-control study</i> —Give the eligibility criteria, and the sources and methods of case ascertainment and control selection. Give the rationale for the choice of cases and controls<br><i>Cross-sectional study</i> —Give the eligibility criteria, and the sources and methods of selection of participants | 6                  |
|                           |        | (b) <i>Cohort study</i> —For matched studies, give matching criteria and number of exposed and unexposed<br><i>Case-control study</i> —For matched studies, give matching criteria and the number of controls per case                                                                                                                                                                                                                                                 | n/a                |
| Variables                 | 7      | Clearly define all outcomes, exposures, predictors, potential confounders, and effect modifiers. Give diagnostic criteria, if applicable                                                                                                                                                                                                                                                                                                                               | 5-6                |
| Data sources/ measurement | 8*     | For each variable of interest, give sources of data and details of methods of assessment (measurement). Describe comparability of assessment methods if there is more than one group                                                                                                                                                                                                                                                                                   | 6                  |
| Bias                      | 9      | Describe any efforts to address potential sources of bias                                                                                                                                                                                                                                                                                                                                                                                                              | n/a                |
| Study size                | 10     | Explain how the study size was arrived at                                                                                                                                                                                                                                                                                                                                                                                                                              | 6                  |
| Quantitative variables    | 11     | Explain how quantitative variables were handled in the analyses. If applicable, describe which groupings were chosen and why                                                                                                                                                                                                                                                                                                                                           | 6                  |
| Statistical methods       | 12     | (a) Describe all statistical methods, including those used to control for confounding                                                                                                                                                                                                                                                                                                                                                                                  | 6                  |
|                           |        | (b) Describe any methods used to examine subgroups and interactions                                                                                                                                                                                                                                                                                                                                                                                                    | 6                  |
|                           |        | (c) Explain how missing data were addressed                                                                                                                                                                                                                                                                                                                                                                                                                            | n/a                |
|                           |        | (d) <i>Cohort study</i> —If applicable, explain how loss to follow-up was addressed<br><i>Case-control study</i> —If applicable, explain how matching of cases and controls was addressed                                                                                                                                                                                                                                                                              | n/a                |



|                          |     |                                                                                                                                                                                                              |      |
|--------------------------|-----|--------------------------------------------------------------------------------------------------------------------------------------------------------------------------------------------------------------|------|
|                          |     | <i>Cross-sectional study</i> —If applicable, describe analytical methods taking account of sampling strategy                                                                                                 |      |
|                          |     | (e) Describe any sensitivity analyses                                                                                                                                                                        | n/a  |
| <b>Results</b>           |     |                                                                                                                                                                                                              |      |
| Participants             | 13* | (a) Report numbers of individuals at each stage of study—eg numbers potentially eligible, examined for eligibility, confirmed eligible, included in the study, completing follow-up, and analysed            | 7    |
|                          |     | (b) Give reasons for non-participation at each stage                                                                                                                                                         | n/a  |
|                          |     | (c) Consider use of a flow diagram                                                                                                                                                                           | n/a  |
| Descriptive data         | 14* | (a) Give characteristics of study participants (eg demographic, clinical, social) and information on exposures and potential confounders                                                                     | 7-8  |
|                          |     | (b) Indicate number of participants with missing data for each variable of interest                                                                                                                          | n/a  |
|                          |     | (c) <i>Cohort study</i> —Summarise follow-up time (eg, average and total amount)                                                                                                                             | n/a  |
| Outcome data             | 15* | <i>Cohort study</i> —Report numbers of outcome events or summary measures over time                                                                                                                          | 7    |
|                          |     | <i>Case-control study</i> —Report numbers in each exposure category, or summary measures of exposure                                                                                                         | n/a  |
|                          |     | <i>Cross-sectional study</i> —Report numbers of outcome events or summary measures                                                                                                                           | n/a  |
| Main results             | 16  | (a) Give unadjusted estimates and, if applicable, confounder-adjusted estimates and their precision (eg, 95% confidence interval). Make clear which confounders were adjusted for and why they were included | n/a  |
|                          |     | (b) Report category boundaries when continuous variables were categorized                                                                                                                                    | n/a  |
|                          |     | (c) If relevant, consider translating estimates of relative risk into absolute risk for a meaningful time period                                                                                             | n/a  |
| Other analyses           | 17  | Report other analyses done—eg analyses of subgroups and interactions, and sensitivity analyses                                                                                                               | 8-9  |
| <b>Discussion</b>        |     |                                                                                                                                                                                                              |      |
| Key results              | 18  | Summarise key results with reference to study objectives                                                                                                                                                     | 9    |
| Limitations              | 19  | Discuss limitations of the study, taking into account sources of potential bias or imprecision. Discuss both direction and magnitude of any potential bias                                                   | 12   |
| Interpretation           | 20  | Give a cautious overall interpretation of results considering objectives, limitations, multiplicity of analyses, results from similar studies, and other relevant evidence                                   | 9-12 |
| Generalisability         | 21  | Discuss the generalisability (external validity) of the study results                                                                                                                                        | 12   |
| <b>Other information</b> |     |                                                                                                                                                                                                              |      |
| Funding                  | 22  | Give the source of funding and the role of the funders for the present study and, if applicable, for the original study on which the present article is based                                                | 14   |

\*Give information separately for cases and controls in case-control studies and, if applicable, for exposed and unexposed groups in cohort and cross-sectional studies.

**Note:** An Explanation and Elaboration article discusses each checklist item and gives methodological background and published examples of transparent reporting. The STROBE checklist is best used in conjunction with this article (freely available on the Web sites of PLoS Medicine at <http://www.plosmedicine.org/>, Annals of Internal Medicine at <http://www.annals.org/>, and Epidemiology at <http://www.epidem.com/>). Information on the STROBE Initiative is available at [www.strobe-statement.org](http://www.strobe-statement.org).

# BMJ Open

## Trends in the utilization of emergency departments in California, 2005-2015: a retrospective analysis

|                                 |                                                                                                                                                                                                                                                                                                                                                                                                                                                                                                                                                                                                             |
|---------------------------------|-------------------------------------------------------------------------------------------------------------------------------------------------------------------------------------------------------------------------------------------------------------------------------------------------------------------------------------------------------------------------------------------------------------------------------------------------------------------------------------------------------------------------------------------------------------------------------------------------------------|
| Journal:                        | <i>BMJ Open</i>                                                                                                                                                                                                                                                                                                                                                                                                                                                                                                                                                                                             |
| Manuscript ID                   | bmjopen-2017-021392.R2                                                                                                                                                                                                                                                                                                                                                                                                                                                                                                                                                                                      |
| Article Type:                   | Research                                                                                                                                                                                                                                                                                                                                                                                                                                                                                                                                                                                                    |
| Date Submitted by the Author:   | 27-Apr-2018                                                                                                                                                                                                                                                                                                                                                                                                                                                                                                                                                                                                 |
| Complete List of Authors:       | Hsia, Renee; UCSF, Emergency Medicine; University of California, San Francisco, Philip R. Lee Institute for Health Policy Studies<br>Sabbagh, Sarah; University of California, San Francisco, Emergency Medicine<br>Guo, Joanna; University of California, San Francisco, Emergency Medicine<br>Nuckton, Thomas; Sutter Eden Medical Center, Medicine; University of California, San Francisco, Medicine<br>Niedzwiecki, Matthew; University of California at San Francisco, Department of Emergency Medicine; University of California at San Francisco, Philip R. Lee Institute for Health Policy Studies |
| <b>Primary Subject Heading</b>: | Emergency medicine                                                                                                                                                                                                                                                                                                                                                                                                                                                                                                                                                                                          |
| Secondary Subject Heading:      | Emergency medicine                                                                                                                                                                                                                                                                                                                                                                                                                                                                                                                                                                                          |
| Keywords:                       | emergency department, healthcare delivery, utilization, demand                                                                                                                                                                                                                                                                                                                                                                                                                                                                                                                                              |
|                                 |                                                                                                                                                                                                                                                                                                                                                                                                                                                                                                                                                                                                             |

SCHOLARONE™  
Manuscripts

only

1  
2  
3 **Trends in the utilization of emergency departments in California, 2005-2015: a**  
4  
5 **retrospective analysis**  
6  
7  
8  
9

10 Renee Y. Hsia, MD, MSc,<sup>1,2</sup> Sarah H. Sabbagh, MPH,<sup>1</sup> Joanna Guo, BA,<sup>1</sup> Thomas J. Nuckton,  
11  
12 MD, MS,<sup>3,4</sup> Matthew J. Niedzwiecki, PhD<sup>1,2</sup>  
13  
14

15  
16  
17 <sup>1</sup>Department of Emergency Medicine, University of California, San Francisco; San Francisco,  
18  
19 California, USA  
20

21 <sup>2</sup>Philip R. Lee Institute for Health Policy Studies, University of California, San Francisco; San  
22  
23 Francisco, California, USA  
24

25  
26 <sup>3</sup>Department of Medicine, Sutter Eden Medical Center; Castro Valley, California, USA  
27

28 <sup>4</sup>Department of Medicine, University of California, San Francisco; San Francisco, California,  
29  
30 USA  
31  
32

33  
34  
35 **Corresponding author:**

36 Renee Y. Hsia, MD, MSc  
37 Department of Emergency Medicine  
38 University of California, San Francisco  
39 1001 Potrero Ave, 1E21, San Francisco General Hospital  
40 San Francisco, CA 94110  
41 Tel: (415) 206-4612  
42 Fax: (415) 206-5818  
43 Email: [renee.hsia@emergency.ucsf.edu](mailto:renee.hsia@emergency.ucsf.edu)  
44  
45  
46  
47  
48  
49

50 **Word Count (text only): 2,740**  
51  
52  
53  
54  
55  
56  
57  
58  
59  
60

## ABSTRACT

**Objective:** To examine current trends in the characteristics of patients visiting California emergency departments (EDs) in order to better direct the allocation of acute care resources.

**Design:** A retrospective study.

**Setting:** We analyzed ED utilization trends between 2005 and 2015 in California using non-public patient data from California's Office of Statewide Health Planning and Development.

**Participants:** We included all ED visits in California from 2005 to 2015.

**Primary and Secondary Outcome Measures:** We analyzed ED visits and visit rates by age, sex, race/ethnicity, payer, and urban/rural trends. We further examined age, sex, race/ethnicity, and urban/rural trends within each payer group for a more granular picture of the patient population. Additionally, we looked at the proportion of patients admitted from the ED and distribution of diagnoses.

**Results:** Between 2005 and 2015, the annual number of ED visits increased from 10.2 to 14.2 million in California. ED visit rates increased by 27.8% ( $p<0.001$ ), with the greatest increases among patients aged 5-19 (37.4%,  $p<0.001$ ) and 45-64 years (41.1%,  $p<0.001$ ), non-Hispanic Black and Hispanic patients (56.8% and 48.8%,  $p<0.001$ ), the uninsured and Medicaid-insured (36.1%,  $p=0.002$ ; 28.6%,  $p<0.001$ ), and urban residents (28.3%,  $p<0.001$ ). The proportion of ED visits resulting in hospitalization decreased by 18.3%, with decreases across all payer groups.

**Conclusions:** Our findings reveal an increasing demand for emergency care and may reflect current limitations in accessing care in other parts of the healthcare system. Policymakers may need to recognize the increasingly vital role that EDs are playing in the provision of care and consider ways to incorporate this changing reality into the delivery of health services.

**Keywords:** emergency department; utilization; demand; healthcare delivery

## STRENGTHS AND LIMITATIONS OF THIS STUDY

- This study examines patient characteristics and emergency department (ED) use trends longitudinally using a dataset containing all ED visits for the state of California.
- California's initiatives to increase Medicaid enrollment through the Affordable Care Act and Low Income Health Programs provide a unique opportunity to study how patient characteristics and healthcare needs have changed over time under continual and gradual efforts to increase healthcare access.
- Our data are limited to California residents, potentially limiting the generalizability of our results despite California's diverse population.
- ED visit rates may be slightly overestimated due to the fact that some populations who visit the ED frequently – including patients who are undocumented and homeless, or live in nursing homes, extended-care facilities, prisons, and mental health facilities – are not accounted for in the population denominator.

## INTRODUCTION

Emergency departments (EDs) are an integral component of the United States (US) health care system, as they provide the only around-the-clock health care to all, regardless of a patient's ability to pay.[1] In the past two decades, the annual number of ED visits in the US has increased by 50%, while the number of EDs has decreased by 11%,[2] raising concerns about the ability of EDs to provide accessible care amidst the rise in demand for emergency care services. Appropriate allocation of resources to meet such demands may require greater focus on ED utilization trends, which reflect the changing patterns of patient healthcare needs and reveal possible factors – including patient conditions, healthcare reform, or insurance coverage changes – that may contribute to the increase in demand for emergency care.[3,4]

Despite outpatient and primary care expansions and increased strategies aimed at reducing emergency care demand,[5-8] ED visits have continued to rise, with greater reliance on EDs to provide care that may be unavailable in other parts of the healthcare system.[9] Previous literature suggest that older patients, minorities, lower-income patients, and Medicaid beneficiaries are more likely to use the ED,[10] and recent reports have continued to show substantial increases in ED utilization, especially among Medicaid-insured patients.[11] However, most studies have either focused on short-term study periods using limited sample sizes to evaluate the impact of the Affordable Care Act (ACA) or have not incorporated measures to evaluate ED utilization relative to population changes.[12-15]

State-level examinations of the association between health insurance and ED use – particularly in the context of ACA reforms – have yielded complex and often conflicting results.[16] Although evaluating the impact of the ACA on healthcare utilization and outcomes remains an important task, our study provides a more comprehensive assessment of how patient characteristics and healthcare needs have changed over an 11-year period in California – one of

1  
2  
3 the largest and most diverse states in the country[17] – to help better design the necessary  
4  
5 policies and programs to meet patients’ healthcare needs. Additionally, California’s initiatives to  
6  
7 increase enrollment in Medicaid (a government health insurance program for qualified low-  
8  
9 income or disabled people) through the ACA and Low Income Health Programs (LIHP) provide  
10  
11 a unique opportunity to study how patient characteristics and healthcare needs have changed  
12  
13 over time under continual and gradual efforts to increase healthcare access. Thus, we sought to  
14  
15 examine state-level trends in emergency care demand from 2005 to 2015 in California. Using  
16  
17 state-level data, we analyzed patient age, sex, race/ethnicity, insurance status, and region of care  
18  
19 to examine where emergency care demands are most critical and where future resources may be  
20  
21 directed to improve care and lessen ED utilization. We hypothesized that ED visit rates would  
22  
23 increase between 2005 and 2015, particularly among minority, Medicaid-insured, and uninsured  
24  
25 patients.  
26  
27  
28  
29  
30  
31  
32

## 33 **METHODS**

### 34 **Study Design and Data Sources**

35  
36 We obtained 2005-2015 non-public Patient Discharge Data (PDD), Emergency  
37  
38 Department Data (EDD), Hospital Annual Financial Data, and Hospital Annual Utilization Data  
39  
40 from California’s Office of Statewide Health Planning and Development (OSHPD), which  
41  
42 conducts annual, standardized surveys required of all hospitals and health service facilities in  
43  
44 California.[18,19] To account for changes in California’s population over time, we calculated  
45  
46 annual ED utilization rates by age, sex, race/ethnicity, insurance payer, and urban/rural  
47  
48 residence. We used annual age and sex population estimates provided by the US Census  
49  
50 Bureau;[20,21] state population insurance coverage estimates from the Current Population  
51  
52 Survey’s Annual Social and Economic Supplements (for the years 2005-2012) and American  
53  
54  
55  
56  
57  
58  
59  
60

1  
2  
3 Community Survey (for the years 2013-2015);[22,23] and race/ethnicity population estimates  
4  
5 from the California Department of Finance (for the years 2005-2009) and the US Census Bureau  
6  
7 (for the years 2010-2015).[24,25]  
8  
9  
10  
11

## 12 **Inclusion Criteria and Variable Definition**

13  
14 We included all ED visits in California from 2005 to 2015, and classified ED visits as  
15  
16 inpatient if the visit resulted in a hospital admission and outpatient if the visit resulted in a  
17  
18 discharge directly from the ED without admission. All observation stays that initially came  
19  
20 through the ED – whether they were admitted to the inpatient setting or discharged directly from  
21  
22 the ED – were captured in our dataset and categorized as either a hospital admission or ED  
23  
24 discharge. We designated hospitals as urban or rural based on the corresponding county listed in  
25  
26 the non-public PDD documentation.  
27  
28  
29  
30  
31  
32

## 33 **Patient Involvement**

34  
35 Patients were not involved in the development of the research question, outcome  
36  
37 measures, or study design. We did not actively recruit patients for this study, and the results will  
38  
39 not be disseminated to the study participants as we used unidentified data and have no way of  
40  
41 contacting the patients.  
42  
43  
44  
45  
46

## 47 **Statistical Analysis**

48  
49 We analyzed ED visits and visit rates using a linear regression model to test for  
50  
51 significant linear temporal trends in California from 2005 to 2015 by age group (<5 years, 5-19  
52  
53 years, 20-44 years, 45-64 years, and 65 years and over); sex (male, female, unknown);  
54  
55 race/ethnicity group (non-Hispanic White, non-Hispanic Black, Hispanic, Other);  
56  
57  
58  
59  
60



1  
2  
3 payer/insurance status (private, Medicare, Medicaid, uninsured/self-pay, other, unknown); and  
4  
5 metropolitan statistical area (rural or urban). Furthermore, we looked at age, sex, race/ethnicity,  
6  
7 urban/rural trends by payer/insurance status for a more granular picture of patient population  
8  
9 differences within each insurance group. We obtained International Classification of Disease, 9th  
10  
11 Revision, Clinical Modification (ICD-9-CM) codes for principal hospital discharge diagnoses for  
12  
13 2005-2014, and categorized them into multi-level diagnoses codes using the Agency for  
14  
15 Healthcare Research and Quality's Clinical Classification Software (CCS) to examine changes in  
16  
17 conditions observed in the ED over time. We clustered 2015 primary diagnoses into multi-level  
18  
19 CCS categories using single-level CCS categorizations provided in the data, which accounted for  
20  
21 the transition from ICD-9 to ICD-10 coding in October 2015. We performed all analyses using  
22  
23 Stata software (version 14, Stata Corporation, College Station, TX). The University of  
24  
25 California, San Francisco Institutional Review Board approved this study.  
26  
27  
28  
29  
30  
31  
32

## 33 RESULTS

34  
35 Between 2005 and 2015, total annual ED visits in California increased by 39.7%  
36  
37 ( $p<0.001$ ), from 10.2 million to 14.2 million (Supplementary Table 1). ED utilization in  
38  
39 California gradually increased across most years in the study period, with two pronounced jumps  
40  
41 from 2008 to 2009 (8.1%) and 2014 to 2015 (6.3%). The number of ED visits grew the most  
42  
43 among patients aged 45-64 (55.8%;  $p<0.001$ ), female patients (42.5%;  $p<0.001$ ), Hispanic  
44  
45 patients (78.4%;  $p<0.001$ ), Medicaid beneficiaries (151.0%;  $p=0.001$ ), and those living in urban  
46  
47 areas (40.5%;  $p<0.001$ ).  
48  
49  
50

51 After adjusting for the 9.3% population growth in California during our study period, we  
52  
53 found an overall 27.8% ( $p<0.001$ ) increase in ED visit rates between 2005 and 2015 (Table 1),  
54  
55 with significant increases among all patient characteristics examined. In 2015, ED visit rates  
56  
57  
58  
59  
60

1  
2  
3 were the highest among patients aged less than 5 and 65 and over (543 visits and 503 visits per  
4  
5 1,000 California residents aged less than 5 and 65 and over, respectively), non-Hispanic Black  
6  
7 patients (703 per 1,000), Medicaid-insured patients (747 per 1,000), and rural residents (501 per  
8  
9 1,000). ED visit rates grew the fastest among patients aged 5-19 (37.4% increase, from 196 to  
10  
11 269 per 1,000) and 45-64 (41.1% increase, from 101 to 142 per 1,000) ( $p < 0.001$  for both) – in  
12  
13 particular, a 232% increase among Medicaid-insured 45-64-year-olds (Supplementary Table 2) –  
14  
15 uninsured patients (36.1% increase, from 242 to 330 per 1,000;  $p = 0.002$ ), and urban residents  
16  
17 (28.3% increase, from 281 to 361 per 1,000;  $p < 0.001$ ). Although non-Hispanic Black patients  
18  
19 had a strikingly higher ED visit rate in 2015, both non-Hispanic Black and Hispanic patients  
20  
21 experienced similar high levels of ED visit rate growth (56.8% increase, from 448 to 703 per  
22  
23 1,000; and 48.8% increase, from 237 to 353 per 1,000, respectively;  $p < 0.001$  for both) during the  
24  
25 study period. See Supplementary Tables 3-5 for additional results on ED visits stratified by  
26  
27 insurance groups (privately insured, Medicare insured, and uninsured, respectively).

28  
29  
30  
31  
32  
33 When examining ED discharge and hospital admission trends, the number of ED visits  
34  
35 resulting in a discharge increased by 44.5%, from 8.6 million to 12.4 million, and the number  
36  
37 resulting in a hospital admission increased by 14.2%, from roughly 1.6 million to 1.9 million  
38  
39 during the study period. The proportion of ED visits that resulted in a discharge increased by  
40  
41 3.5% (from 84.0% of ED visits in 2005 to 86.9% in 2015), while the proportion that resulted in a  
42  
43 hospital admission decreased by 18.3% (from 16.0% of ED visits in 2005 to 13.1% in 2015;  
44  
45 Figure 1).

### 51 **ED Visit Patient Composition Trends by Payer**

52  
53 Although ED visit rates increased across all payer groups, the proportion of ED visits  
54  
55 from private and uninsured patients decreased by 24.0% (from 35.0% to 26.6%) and 50.1%

(from 15.4% to 7.7%), respectively, while the proportion of ED visits from Medicare- and Medicaid-insured patients increased by 13.1% (from 18.7% to 21.1%) and 79.7% (from 22.9% to 41.1%), respectively, during the study period (Figure 2).

We further examined payer composition trends by looking at ED visits resulting in a hospital admission. The number of ED visits resulting in hospitalization grew for Medicaid- and Medicare-insured patients by 72.0% and 18.5%, respectively, but declined for privately insured and uninsured patients by 8.3% and 71.3%, respectively. However, we found that the proportion of all ED visits resulting in hospitalization reduced across all payer groups, with decreases of 13.6% for the privately insured, 31.4% for the Medicaid-insured, 25.0% for the Medicare-insured, and 58.8% for the uninsured.

### **ED Visit Trends by CCS Diagnoses**

When we analyzed ED visits by multi-level CCS diagnosis groups, we found that the number of ED visits increased across all CSS diagnoses except for the unclassified conditions group (Figure 3). The top 3 conditions for which ED visits grew the most included infectious and parasitic diseases (88.2%), diseases of the blood and blood-forming organs (78.7%), and mental illness (70.8%). However, the top 3 most prevalent conditions during the study period were injury and poisoning (20.6%), diseases of the respiratory system (12.8%), and ill-defined conditions (12.5%).

## **DISCUSSION**

Between 2005 and 2015, ED visit rates increased by 27.8% in California, with the greatest ED visit rate growth among patients aged 5-19 and 45-64 years old, uninsured and Medicaid-insured patients, non-Hispanic Black and Hispanic patients, and patients living in

1  
2  
3 urban areas. Despite relatively slower ED visit rate growth trends, the youngest (less than 5  
4 years) and elderly (65 and over) patient groups as well as Medicare-insured patients retained  
5 high ED visit rates throughout the study period.  
6  
7  
8

9  
10 Our findings are consistent with previous studies,[8,10,15] and suggest that healthcare  
11 needs tend to exist across the entire age spectrum, albeit for a range of reasons. Patients aged less  
12 than 5 had the highest ED utilization rate as of 2015, outpacing the ED utilization rate for  
13 patients 65 and over. This finding, along with the high ED visit rate growth for patients aged 5-  
14 19, potentially suggests a need for coordinated acute care for the pediatric population, as well as  
15 the need to re-examine the availability and role of EDs equipped to treat children, particularly  
16 among underinsured pediatric patients. On the other hand, while patients aged 45-64 had the  
17 lowest overall ED visit rate during the study period, this group experienced the greatest ED  
18 utilization rate increase. This suggests that patients nearing 65 may have significant health care  
19 needs given prior evidence of sharp increases in healthcare utilization once patients turned 65  
20 years old.[26] Meanwhile, patients aged 65 and over retained high steady ED visit rates.[27] The  
21 consistent high ED utilization rates and current trends in providers who refer elderly patients to  
22 the ED [28,29] suggests a need for improving geriatric care at a systemic level to treat elderly  
23 patients effectively and in a timely manner.  
24  
25  
26  
27  
28  
29  
30  
31  
32  
33  
34  
35  
36  
37  
38  
39  
40  
41

42 Our results revealed that ED utilization rates grew the fastest among non-Hispanic Black  
43 and Hispanic patients. Although we found similar ED visit rates between non-Hispanic White  
44 and Hispanic patients, it is possible that the observed number of ED visits by Hispanic patients is  
45 overall lower because this demographic may be more likely to avoid visiting the ED for reasons  
46 such as language barriers, fear of deportation, and other cultural factors.[30] These trends may  
47 point to substantial gaps in the healthcare system, specifically for racial/ethnic minorities. They  
48  
49  
50  
51  
52  
53  
54  
55  
56  
57  
58  
59  
60

1  
2  
3 may also suggest that although healthcare access has increased to some extent, disparities still  
4 exist [31] as EDs, acting as “safety nets,” continue to provide increasingly more care.  
5  
6

7         Prior studies have reported high ED utilization rates among Medicaid-insured and  
8 uninsured patients,[8,10,32] consistent with our findings of large ED visit rate increases in these  
9 payer groups. Our findings could reflect a number of trends. First, the use of EDs as “safety nets”  
10 has been previously reported,[33] with one study reporting that more than 50% of all acute visits  
11 by uninsured patients were to emergency physicians, who comprise less than 5% of all  
12 physicians in the US.[34] Second, difficulty in accessing primary care has been widely cited as a  
13 potential source for the increasing trends of ED use by Medicaid-insured patients.[5,32] Despite  
14 initiatives such as the ACA – designed to provide low-income individuals with health care access  
15 – Medicaid-insured patients increasingly seek care in the ED as a result of untimely access to  
16 primary and specialty care.[9] The high use of EDs by Medicaid-insured patients has been  
17 largely attributed to the reluctance of many primary care providers to accept Medicaid insurance  
18 due to low reimbursement rates.[5,35] At the same time, however, increasing literature shows  
19 that even patients with adequate primary care access are often referred to the ED by their primary  
20 care physicians,[14] suggesting that physicians themselves are also relying on the emergency  
21 care system to help diagnose and manage patients. Last, the utilization of EDs over other  
22 ambulatory care venues by patients of low socioeconomic status is influenced not only by  
23 insurance status or affordability, but also by accessibility, availability, perceptions of  
24 accommodation, and high disease burden.[36,37] These factors are important to consider when  
25 exploring potential solutions to improve the accessibility, provision, and quality of care.  
26  
27  
28  
29  
30  
31  
32  
33  
34  
35  
36  
37  
38  
39  
40  
41  
42  
43  
44  
45  
46  
47  
48  
49  
50

51         Despite increasing numbers of ED visits, the proportion of ED visits resulting in inpatient  
52 admissions decreased. Prior studies have indicated that high numbers of complex and urgent  
53 patients are being managed in EDs,[38,39] and the decreases in the proportion of admissions  
54  
55  
56  
57  
58  
59  
60

1  
2  
3 seen in our study could indicate that patients with complex conditions are being evaluated,  
4  
5 treated, and discharged from the ED rather than being admitted or cared for elsewhere. Although  
6  
7 this has potential benefits to healthcare systems, management of high-acuity outpatients in the  
8  
9 ED could further contribute to the demands on EDs.

10  
11  
12 Other changes in ED visit trends included decreases in the proportion of ED visits for  
13  
14 conditions related to injury and poisoning and increases in the proportion of medical conditions,  
15  
16 including infectious and parasitic diseases and mental illness. Consistent with prior evidence of a  
17  
18 decrease in ED visit rates for injuries in California from 2005-2011 but an increase for non-  
19  
20 injury diagnoses,[40] our findings reveal the changing role of the ED in the health care system,  
21  
22 where EDs are treating and providing care for more complex medical conditions. As chronic  
23  
24 illnesses increase in the US[41] and the management of these conditions becomes more complex,  
25  
26 it will become critical to expand services and access to treatments for conditions that drive ED  
27  
28 utilization and demand for emergency care.  
29  
30  
31  
32  
33  
34

### 35 **Limitations**

36  
37 Our study includes several limitations. First, OSHPD collects retrospective, self-reported  
38  
39 data from hospitals, which could introduce potential reporting errors or missing data; however,  
40  
41 hospitals submit routine accuracy checks using OSHPD's Medical Information Reporting for  
42  
43 California (MIRCal) online system, which reduces such errors. Second, our data are limited to  
44  
45 California residents and may limit the generalizability and applicability of our results on a  
46  
47 national or global level, despite California's diverse and high Medicaid-insured population.  
48  
49 Third, US Census Bureau surveys exclude undocumented and homeless populations, as well as  
50  
51 individuals residing in nursing homes, extended-care facilities, prisons, and mental health  
52  
53 facilities. Many of these individuals visit the ED on a frequent basis, and thus ED visit rates  
54  
55  
56  
57  
58  
59  
60

1  
2  
3 could be overestimated because many of these people are not accounted for in the population  
4  
5 denominator.  
6  
7  
8

## 9 10 **CONCLUSIONS**

11  
12 Our findings suggest that the demand for emergency care continues to rise. ED visit rates  
13  
14 in California increased from 2005-2015, across all age groups, and particularly among the  
15  
16 uninsured, Medicaid-insured, non-Hispanic Black, Hispanic, and urban-residing patients.  
17  
18 Increased ED visit rates by Medicaid-insured and uninsured patients may reflect current  
19  
20 limitations in accessing care in other parts of the healthcare system. Furthermore, changes in  
21  
22 conditions seen in the ED suggest that patient healthcare needs are becoming increasingly great  
23  
24 and complex. Rather than focusing solely on efforts to reduce ED use, policymakers may need to  
25  
26 recognize that EDs are playing an increasingly vital role in the provision of care and consider  
27  
28 ways to incorporate this changing reality into the delivery of health services.  
29  
30  
31  
32  
33  
34  
35  
36  
37  
38  
39  
40  
41  
42  
43  
44  
45  
46  
47  
48  
49  
50  
51  
52  
53  
54  
55  
56  
57  
58  
59  
60

## **AUTHORS' CONTRIBUTIONS**

RYH and MJN contributed to the conception and design of the study. SS and TJN drafted the manuscript. MJN and JG contributed to the analysis of data. RYH provided supervision. RYH, SS, JG, TJN, and MJN contributed to the interpretation of the data and critically reviewed, revised, and approved the manuscript.

## **ACKNOWLEDGMENTS**

The authors thank the California Office of Statewide Health Planning and Development for their assistance in preparing the datasets used in this project.

## **FUNDING STATEMENT**

This work was supported by the California Health Care Foundation. The sponsor had no role in the design and conduct of the study; collection, management, analysis, and interpretation of the data; preparation, review, or approval of the manuscript; and decision to submit the manuscript for publication.

## **COMPETING INTERESTS STATEMENT**

None declared.

## **ETHICAL APPROVAL**

The University of California, San Francisco Institutional Review Board approved this study.



1  
2  
3  
4  
5  
6  
7  
8  
9  
10  
11  
12  
13  
14  
15  
16  
17  
18  
19  
20  
21  
22  
23  
24  
25  
26  
27  
28  
29  
30  
31  
32  
33  
34  
35  
36  
37  
38  
39  
40  
41  
42  
43  
44  
45  
46  
47  
48  
49  
50  
51  
52  
53  
54  
55  
56  
57  
58  
59  
60

**PATIENT CONSENT**

Not applicable.

**DATA SHARING STATEMENT**

The data are available through the California Office of Statewide Health Planning and Development.

For peer review only

## REFERENCES

1. EMTALA. Emergency Medical Treatment and Active Labor Act of 1985. Pub L No. 99-272, 42 USC §1395dd. 1986.
2. American Hospital Association. Trendwatch chartbook 2016: trends affecting hospitals and health systems. Table 3.3: emergency department visits, emergency department visits per 1,000 persons, and number of emergency departments, 1994-2014. 2016.
3. Skinner HG, Blanchard J, Elixhauser A. Trends in emergency department visits, 2006-2011. HCUP Statistical Brief #179. Rockville, MD: Agency for Healthcare Research and Quality; 2014. <https://www.hcup-us.ahrq.gov/reports/statbriefs/sb179-Emergency-Department-Trends.pdf> (accessed 06 Dec 2017).
4. Emergency Physicians: Anthem Blue Cross Blue Shield policy violates federal law [press release]. Washington: PRNewswire-USNewswire, 16 May 2017. <http://newsroom.acep.org/2017-05-16-Emergency-Physicians-Anthem-Blue-Cross-Blue-Shield-Policy-Violates-Federal-Law> (accessed 06 Dec 2017).
5. Kellermann AL, Weinick RM. Emergency departments, Medicaid costs, and access to primary care — understanding the link. *N Engl J Med* 2012;366:2141-3.
6. Friedman AB, Saloner B, Hsia RY. No place to call home - policies to reduce ED use in Medicaid. *N Engl J Med* 2015;372:2382-5.
7. Flores-Mateo G, Violan-Fors C, Carrillo-Santistevé P, et al. Effectiveness of organizational interventions to reduce emergency department utilization: a systematic review. *PLoS One* 2012;7:e35903.
8. Taubman SL, Allen HL, Wright BJ, et al. Medicaid increases emergency-department use: evidence from Oregon's health insurance experiment. *Science* 2014;343:263-8.

- 1  
2  
3 9. American College of Emergency Physicians. ER visits continue to rise since implementation  
4 of Affordable Care Act. 04 May 2015. <http://newsroom.acep.org/2015-05-04-ER-Visits-Continue-to-Rise-Since-Implementation-of-Affordable-Care-Act> (accessed 06 Dec 2017).  
5  
6  
7  
8
- 9  
10 10. McConville S, Lee H. Emergency department care in California: who uses it and why? San  
11 Francisco, CA: The Public Policy Institute of California 10(1); 2008.  
12  
13 <http://www.ppic.org/publication/emergency-department-care-in-california-who-uses-it-and-why/>  
14 (accessed 06 Dec 2017).  
15  
16
- 17 11. HCUP Fast Stats, Healthcare Cost and Utilization Project. California: All ED visits (adults  
18 and pediatric) by expected payer. Rockville, MD: Agency for Healthcare Research and Quality;  
19 2017. <https://www.hcup-us.ahrq.gov/faststats/StatePayerEDServlet?state1=CA> (accessed 06 Dec  
20 21 22 23 24 25 26 27 2017).
- 28 12. Garthwaite C, Gross T, Notowidigdo M, et al. Insurance expansion and hospital emergency  
29 department access: evidence from the Affordable Care Act. *Ann Intern Med* 2017;166:172-9.  
30  
31
- 32 13. Sommers BD, Blendon RJ, Orav EJ, et al. Changes in utilization and health among low-  
33 income adults after Medicaid expansion or expanded private insurance. *JAMA Intern Med*  
34 35 36 37 38 2016;176:1501-9.
- 39 14. Finkelstein AN, Taubman SL, Allen HL, et al. Effect of Medicaid coverage on ED use —  
40 further evidence from Oregon’s experiment. *New Engl J Med* 2016;375:1505-7.  
41  
42  
43
- 44 15. Barakat MT, Mithal A, Huang RJ, et al. Affordable Care Act and healthcare delivery: a  
45 comparison of California and Florida hospitals and emergency departments. *PLoS One*  
46 47 48 49 2017;12:e0182346.
- 50 16. Sommers BD, Simon K. Health insurance and emergency department use - a complex  
51 relationship. *N Engl J Med* 2017;376:1708-11.  
52  
53  
54  
55  
56  
57  
58  
59  
60

- 1  
2  
3 17. The Henry J. Kaiser Family Foundation. The California health care landscape. 2015.  
4  
5 <http://kff.org/health-reform/fact-sheet/the-california-health-care-landscape/>. (accessed 01 Mar  
6  
7 2018).  
8  
9  
10 18. Hospital Annual Financial Data 2005-2015. California Office of Statewide Health Planning  
11  
12 and Development. 2016.  
13  
14 [http://www.oshpd.ca.gov/hid/Products/Hospitals/AnnFinanData/SubSets/SelectedData/default.as](http://www.oshpd.ca.gov/hid/Products/Hospitals/AnnFinanData/SubSets/SelectedData/default.asp)  
15  
16 [p](http://www.oshpd.ca.gov/hid/Products/Hospitals/AnnFinanData/SubSets/SelectedData/default.asp). (accessed 01 Sept 2016).  
17  
18  
19 19. Hospital Annual Utilization Data 2005-2015. California Office of Statewide Health Planning  
20  
21 and Development. 2016. <https://www.oshpd.ca.gov/HID/Hospital-Utilization.html>. (accessed 01  
22  
23 Sept 2016).  
24  
25  
26 20. Table 2. Intercensal estimates of the resident population by sex and age for California: April  
27  
28 1, 2000 to July 1, 2010. U.S. Census Bureau, Population Division. 2012.  
29  
30 <https://www.census.gov/data/tables/time-series/demo/posest/intercensal-2000-2010-state.html>  
31  
32 (accessed 06 Dec 2017).  
33  
34  
35 21. Annual estimates of the resident population for selected age groups by sex for the United  
36  
37 States, states, counties and Puerto Rico Commonwealth and Municipios: April 1, 2010 to July 1,  
38  
39 2015. U.S. Census Bureau, Population Division. 2016.  
40  
41 <https://factfinder.census.gov/faces/tableservices/jsf/pages/productview.xhtml?src=bkmk>  
42  
43 (accessed 06 Dec 2017).  
44  
45  
46 22. Health insurance coverage status and type of coverage by state and age for all people: 2005-  
47  
48 2011. Current Population Survey, 2006-2012 Annual Social and Economic Supplement. U.S.  
49  
50 Census Bureau. <https://www.census.gov/data/tables/time-series/demo/income-poverty/cps->  
51  
52 [hi.html](https://www.census.gov/data/tables/time-series/demo/income-poverty/cps-hi.html) (accessed 06 Dec 2017).  
53  
54  
55  
56  
57  
58  
59  
60

- 1  
2  
3 23. Health insurance coverage status and type of coverage by state and age for all people: 2013-  
4 2015. American Community Survey, 2013-2015. U.S. Census.  
5  
6  
7 24. Race/ethnic population with age and sex detail, 2000-2010. State of California, Department  
8 of Finance. 2012. [http://www.dof.ca.gov/Forecasting/Demographics/Estimates/Race-](http://www.dof.ca.gov/Forecasting/Demographics/Estimates/Race-Ethnic/2000-2010/)  
9 [Ethnic/2000-2010/](http://www.dof.ca.gov/Forecasting/Demographics/Estimates/Race-Ethnic/2000-2010/) (accessed 06 Dec 2017).  
10  
11  
12  
13  
14 25. Annual estimates of the resident population by sex, age, race, and Hispanic origin for the  
15 United States and States: April 1, 2010 to July 1, 2015. U.S. Census Bureau, Population  
16 Division. 2016.  
17 <https://factfinder.census.gov/faces/tableservices/jsf/pages/productview.xhtml?src=bkmk>  
18 (accessed 06 Dec 2017).  
19  
20  
21  
22  
23 26. Card D, Dobkin C, Maestas N. The impact of nearly universal insurance coverage on health  
24 care utilization: evidence from Medicare. *Am Econ Rev* 2008;98:2242-58.  
25  
26  
27 27. Samaras N, Chevalley T, Samaras D, et al. Older patients in the emergency department: a  
28 review. *Ann Emerg Med* 2010;56:261-9.  
29  
30  
31 28. Greenwald PW, Estevez RM, Clark S, et al. The ED as the primary source of hospital  
32 admission for older (but not younger) adults. *Am J Emerg Med* 2016;34:943-7.  
33  
34  
35 29. Schuur JD, Venkatesh AK. The growing role of emergency departments in hospital  
36 admissions. *N Engl J Med* 2012;367:391-3.  
37  
38  
39 30. Perez-Escamilla R, Garcia J, Song D. Health care access among Hispanic Immigrants:  
40 ¿Alguien esta escuchando [is anybody listening?]. *NAPA bulletin* 2010;34:47-67.  
41  
42  
43 31. Artiga S, Young K, Garfield R, et al. Racial and ethnic disparities in access to and utilization  
44 of care among insured adults. The Henry J. Kaiser Family Foundation; 2015.  
45  
46  
47  
48  
49  
50  
51  
52  
53  
54  
55  
56  
57  
58  
59  
60

1  
2  
3 [https://www.kff.org/disparities-policy/issue-brief/racial-and-ethnic-disparities-in-access-to-and-  
5 utilization-of-care-among-insured-adults/](https://www.kff.org/disparities-policy/issue-brief/racial-and-ethnic-disparities-in-access-to-and-<br/>4 utilization-of-care-among-insured-adults/) (accessed 06 Dec 2017).  
6

7  
8 32. Hsia RY, Brownell J, Wilson S, et al. Trends in adult emergency department visits in  
9 California by insurance status, 2005-2010. *JAMA* 2013;310:1181-3.  
10

11  
12 33. Burt C, IE A. Characteristics of emergency departments serving high volumes of safety-net  
13 patients: United States, 2000. *Vital health Stat 13*. 2004:1-16.  
14

15  
16 34. Pitts SR, Carrier ER, Rich EC, et al. Where Americans get acute care: increasingly, it's not at  
17 their doctor's office. *Health Aff (Millwood)* 2010;29:1620-9.  
18

19  
20 35. Decker SL. In 2011 nearly one-third of physicians said they would not accept new Medicaid  
21 patients, but rising fees may help. *Health Aff (Millwood)* 2012;31:1673-9.  
22

23  
24 36. Kangovi S, Barg FK, Carter T, et al. Understanding why patients of low socioeconomic  
25 status prefer hospitals over ambulatory care. *Health Aff (Millwood)* 2013;32:1196-203.  
26

27  
28 37. Hudon C, Sanche S, Haggerty JL. Personal characteristics and experience of primary care  
29 predicting frequent use of emergency department: a prospective cohort study. *PLoS One*  
30 2016;11:e0157489.  
31

32  
33 38. Herring AA, Johnson B, Ginde A, et al. High-intensity emergency department visits  
34 increased In California, 2002–09. *Health Aff (Millwood)* 2013;32:1811-19.  
35

36  
37 39. Burke LG, Wild RC, Orav EJ, et al. Are trends in billing for high-intensity emergency care  
38 explained by changes in services provided in the emergency department? An observational study  
39 among US Medicare beneficiaries. *BMJ Open* 2018;8:e019357.  
40

41  
42 40. Hsia RY, Nath JB, Baker LC. California emergency department visit rates for medical  
43 conditions increased while visit rates for injuries fell, 2005–11. *Health Aff (Millwood)*  
44 2015;34:621-6.  
45  
46  
47  
48  
49  
50  
51  
52  
53  
54  
55  
56  
57  
58  
59  
60

1  
2  
3 41. Office of Disease Prevention and Health Promotion. General health status: chronic disease  
4 prevalence 2016. [https://www.healthypeople.gov/2020/about/foundation-health-  
6 measures/General-Health-Status - chronic](https://www.healthypeople.gov/2020/about/foundation-health-<br/>5 measures/General-Health-Status - chronic) (accessed 06 Dec 2017).  
7  
8  
9  
10  
11  
12  
13  
14  
15  
16  
17  
18  
19  
20  
21  
22  
23  
24  
25  
26  
27  
28  
29  
30  
31  
32  
33  
34  
35  
36  
37  
38  
39  
40  
41  
42  
43  
44  
45  
46  
47  
48  
49  
50  
51  
52  
53  
54  
55  
56  
57  
58  
59  
60

For peer review only

## FIGURE LEGEND

### Figure 1

*Caption:* Proportion of California emergency department visits resulting in admission vs. discharge, 2005-2015

*Source:* Authors' analysis of Emergency Discharge Data and Patient Discharge Data from the California Office of Statewide Health Planning and Development, 2005-2015.

### Figure 2

*Caption:* Proportion of California emergency department visits by payer, 2005-2015

*Source:* Authors' analysis of Emergency Discharge Data and Patient Discharge Data from the California Office of Statewide Health Planning and Development, 2005-2015

### Figure 3

*Caption:* California emergency department visits by diagnosis, 2005 and 2015

*Source:* Authors' analysis of Emergency Discharge Data from the California Office of Statewide Health Planning and Development, 2005 and 2015



**Table 1. California emergency department visit rates (per 1000 population), 2005-2015**

|                            | 2005  | 2006  | 2007  | 2008  | 2009  | 2010  | 2011  | 2012  | 2013  | 2014  | 2015  | % Change | P-value |
|----------------------------|-------|-------|-------|-------|-------|-------|-------|-------|-------|-------|-------|----------|---------|
| <b>Total ED visit rate</b> | 284.3 | 282.4 | 289.0 | 294.4 | 315.3 | 309.8 | 317.3 | 326.0 | 331.1 | 344.9 | 363.5 | 27.8%    | <0.001  |
| <b>Age group</b>           |       |       |       |       |       |       |       |       |       |       |       |          |         |
| <5                         | 455.4 | 448.4 | 474.8 | 479.1 | 544.5 | 514.3 | 510.3 | 508.8 | 518.5 | 512.9 | 542.5 | 19.1%    | <0.001  |
| 5-19                       | 195.7 | 191.3 | 196.7 | 200.4 | 234.0 | 215.8 | 223.4 | 227.3 | 239.0 | 250.1 | 268.9 | 37.4%    | <0.001  |
| 20-44                      | 266.9 | 264.9 | 270.7 | 274.5 | 291.9 | 290.0 | 296.3 | 306.0 | 309.2 | 328.6 | 346.4 | 29.8%    | <0.001  |
| 45-64                      | 100.7 | 102.4 | 106.1 | 110.5 | 116.2 | 118.1 | 121.8 | 127.0 | 128.3 | 135.5 | 142.1 | 41.1%    | <0.001  |
| 65+                        | 461.0 | 464.1 | 464.0 | 470.3 | 471.5 | 474.8 | 485.9 | 490.6 | 486.6 | 486.2 | 503.0 | 9.1%     | <0.001  |
| <b>Sex</b>                 |       |       |       |       |       |       |       |       |       |       |       |          |         |
| Male                       | 266.4 | 264.7 | 270.1 | 273.6 | 291.7 | 285.9 | 292.5 | 300.1 | 305.1 | 317.2 | 336.0 | 26.2%    | <0.001  |
| Female                     | 300.1 | 299.9 | 307.7 | 315.0 | 338.7 | 333.3 | 341.7 | 351.6 | 356.7 | 372.2 | 390.6 | 30.1%    | <0.001  |
| <b>Race/Ethnicity</b>      |       |       |       |       |       |       |       |       |       |       |       |          |         |
| NH White                   | 294.5 | 299.4 | 308.8 | 315.3 | 336.8 | 339.6 | 347.9 | 358.2 | 357.4 | 366.8 | 381.1 | 29.4%    | <0.001  |
| NH Black                   | 448.2 | 469.0 | 497.7 | 524.7 | 581.5 | 593.7 | 615.1 | 642.3 | 646.9 | 675.1 | 702.9 | 56.8%    | <0.001  |
| Hispanic                   | 237.1 | 238.9 | 249.5 | 259.5 | 288.8 | 278.1 | 287.8 | 296.8 | 310.6 | 328.0 | 352.9 | 48.8%    | <0.001  |
| Other                      | 185.3 | 191.6 | 199.8 | 199.9 | 214.7 | 211.3 | 213.6 | 215.7 | 217.6 | 230.2 | 249.2 | 34.4%    | <0.001  |
| <b>Payer</b>               |       |       |       |       |       |       |       |       |       |       |       |          |         |
| Private                    | 171.0 | 166.2 | 168.9 | 174.7 | 196.9 | 180.1 | 186.5 | 181.8 | 186.1 | 184.6 | 181.4 | 6.1%     | 0.012   |
| Medicaid                   | 580.9 | 574.7 | 596.5 | 605.6 | 611.2 | 638.0 | 623.6 | 654.1 | 645.2 | 731.6 | 747.3 | 28.6%    | <0.001  |
| Medicare                   | 459.2 | 490.6 | 492.0 | 501.3 | 497.7 | 496.4 | 516.7 | 539.1 | 529.8 | 528.7 | 536.9 | 16.9%    | <0.001  |
| Uninsured/self-pay         | 242.2 | 251.5 | 263.6 | 255.8 | 249.0 | 254.4 | 253.5 | 278.9 | 293.8 | 290.8 | 329.7 | 36.1%    | 0.002   |
| <b>MSA</b>                 |       |       |       |       |       |       |       |       |       |       |       |          |         |
| Urban                      | 281.0 | 279.1 | 286.0 | 291.5 | 312.6 | 307.2 | 314.8 | 323.6 | 328.5 | 342.3 | 360.6 | 28.3%    | <0.001  |
| Rural                      | 425.7 | 421.8 | 418.7 | 419.9 | 435.1 | 425.0 | 429.0 | 434.7 | 451.0 | 466.3 | 500.8 | 17.6%    | 0.010   |

Note: ED visit rate denominator includes the population of the corresponding characteristic (e.g. ED visits by male patients in given year/total male population in given year in CA).

1  
2  
3  
4  
5  
6  
7  
8  
9  
10  
11  
12  
13  
14  
15  
16  
17  
18  
19  
20  
21  
22  
23  
24  
25  
26  
27  
28  
29  
30  
31  
32  
33  
34  
35  
36  
37  
38  
39  
40  
41  
42  
43  
44  
45  
46  
47  
48  
49  
50  
51  
52  
53  
54  
55  
56  
57  
58  
59  
60



Figure 1. Proportion of California emergency department visits resulting in admission vs. discharge, 2005-2015

279x215mm (300 x 300 DPI)

View only

1  
2  
3  
4  
5  
6  
7  
8  
9  
10  
11  
12  
13  
14  
15  
16  
17  
18  
19  
20  
21  
22  
23  
24  
25  
26  
27  
28  
29  
30  
31  
32  
33  
34  
35  
36  
37  
38  
39  
40  
41  
42  
43  
44  
45  
46  
47  
48  
49  
50  
51  
52  
53  
54  
55  
56  
57  
58  
59  
60



Figure 2. Proportion of California emergency department visits by payer, 2005-2015

215x279mm (300 x 300 DPI)



Figure 3. California emergency department visits by diagnosis, 2005 and 2015

279x215mm (300 x 300 DPI)

View only

## SUPPLEMENTARY MATERIALS

Supplementary Table 1. Descriptive characteristics of California emergency department visits, 2005-2015

| Characteristic         | 2005     | 2006     | 2007     | 2008     | 2009     | 2010     | 2011     | 2012     | 2013     | 2014     | 2015     | % Change | P-value |
|------------------------|----------|----------|----------|----------|----------|----------|----------|----------|----------|----------|----------|----------|---------|
| <b>Total ED visits</b> | 10187048 | 10172173 | 10476830 | 10777904 | 11654758 | 11564940 | 11960916 | 12407787 | 12717983 | 13379768 | 14228961 | 39.7%    | <0.001  |
| <b>Age group</b>       |          |          |          |          |          |          |          |          |          |          |          |          |         |
| <5                     | 1163718  | 1138675  | 1208600  | 1227060  | 1385661  | 1301325  | 1293277  | 1279965  | 1296007  | 1284076  | 1360921  | 16.9%    | 0.002   |
| 5-19                   | 1543281  | 1508767  | 1548365  | 1580477  | 1850406  | 1704412  | 1748506  | 1768990  | 1851782  | 1926985  | 2060762  | 33.5%    | <0.001  |
| 20-44                  | 3540709  | 3503045  | 3567013  | 3621196  | 3858230  | 3857008  | 3984261  | 4158612  | 4238892  | 4546171  | 4817840  | 36.1%    | <0.001  |
| 45-64                  | 2169625  | 2224611  | 2321347  | 2441078  | 2596714  | 2671541  | 2794199  | 2939632  | 2997090  | 3197982  | 3379431  | 55.8%    | <0.001  |
| 65+                    | 1769715  | 1797075  | 1831505  | 1908093  | 1963747  | 2030654  | 2140673  | 2260588  | 2334212  | 2424554  | 2610007  | 47.5%    | <0.001  |
| <b>Sex</b>             |          |          |          |          |          |          |          |          |          |          |          |          |         |
| Male                   | 4749677  | 4744206  | 4870474  | 4982441  | 5361116  | 5305158  | 5478365  | 5674693  | 5821163  | 6111803  | 6533740  | 37.6%    | <0.001  |
| Female                 | 5400871  | 5426867  | 5605380  | 5794994  | 6293259  | 6259489  | 6482298  | 6732782  | 6896402  | 7267461  | 7694688  | 42.5%    | <0.001  |
| Unknown                | 36498    | 1092     | 973      | 463      | 383      | 290      | 251      | 310      | 418      | 504      | 518      | -98.6%   | 0.243   |
| <b>Race/Ethnicity</b>  |          |          |          |          |          |          |          |          |          |          |          |          |         |
| NH White               | 4629083  | 4678727  | 4803242  | 4882971  | 5136236  | 5101499  | 5215676  | 5364074  | 5343623  | 5473429  | 5670856  | 22.5%    | <0.001  |
| NH Black               | 995223   | 1039629  | 1103005  | 1163257  | 1282527  | 1298439  | 1349509  | 1413949  | 1427593  | 1497705  | 1566555  | 57.4%    | <0.001  |
| Hispanic               | 3003407  | 3087315  | 3289467  | 3489075  | 3983295  | 3913063  | 4120055  | 4314009  | 4580423  | 4911172  | 5358365  | 78.4%    | <0.001  |
| Other                  | 853928   | 897019   | 952814   | 971168   | 1060702  | 1086787  | 1123314  | 1160613  | 1200721  | 1303590  | 1447204  | 69.5%    | <0.001  |
| <b>Payer</b>           |          |          |          |          |          |          |          |          |          |          |          |          |         |
| Private                | 3568181  | 3524078  | 3607646  | 3671131  | 3831600  | 3596830  | 3682133  | 3749377  | 3635780  | 3781082  | 3788784  | 6.2%     | 0.002   |
| Medicaid               | 2330998  | 2328948  | 2475271  | 2652643  | 3114505  | 3117815  | 3229952  | 3362952  | 3629446  | 4858001  | 5849956  | 151.0%   | 0.001   |
| Medicare               | 1901449  | 1961387  | 2021499  | 2136053  | 2213792  | 2329984  | 2470110  | 2642609  | 2728514  | 2839188  | 3002826  | 57.9%    | <0.001  |
| Uninsured/self-pay     | 1569042  | 1621182  | 1677550  | 1697604  | 1823444  | 1838886  | 1882198  | 1892743  | 1909953  | 1386455  | 1093733  | -30.3%   | 0.527   |
| Other                  | 813974   | 734799   | 691266   | 617190   | 669627   | 679615   | 694036   | 757560   | 810812   | 511859   | 488805   | -39.9%   | 0.112   |
| Unknown                | 3404     | 1779     | 3598     | 3283     | 1790     | 1810     | 2487     | 2546     | 3478     | 3183     | 4857     | 42.7%    | 0.307   |
| <b>MSA</b>             |          |          |          |          |          |          |          |          |          |          |          |          |         |
| Urban                  | 9833448  | 9820399  | 10126757 | 10425976 | 11289497 | 11207639 | 11601631 | 12046167 | 12345194 | 12994568 | 13814543 | 40.5%    | <0.001  |
| Rural                  | 353600   | 351774   | 350073   | 351928   | 365261   | 357301   | 359285   | 361620   | 372789   | 385200   | 414418   | 17.2%    | 0.010   |

**Supplementary Table 2. California emergency department visits, 2005-2015 – Medicaid insured**

|                         | 2005    | 2006    | 2007    | 2008    | 2009    | 2010    | 2011    | 2012    | 2013    | 2014    | 2015    | % Change |
|-------------------------|---------|---------|---------|---------|---------|---------|---------|---------|---------|---------|---------|----------|
| <b>Age group, years</b> |         |         |         |         |         |         |         |         |         |         |         |          |
| <5                      | 542614  | 544552  | 593483  | 628214  | 747939  | 717052  | 718256  | 724611  | 768987  | 780620  | 888449  | 63.73%   |
| 5-19                    | 522055  | 514867  | 545227  | 586634  | 747137  | 710344  | 745759  | 776316  | 903245  | 1009845 | 1190903 | 128.12%  |
| 20-44                   | 793956  | 788866  | 824338  | 878460  | 1010731 | 1054531 | 1098763 | 1159400 | 1216910 | 1860400 | 2327443 | 193.15%  |
| 45-64                   | 402904  | 413617  | 441945  | 484342  | 532408  | 557115  | 590926  | 625197  | 658112  | 1115845 | 1337561 | 231.98%  |
| 65+                     | 69469   | 67046   | 70278   | 74993   | 76290   | 78773   | 76248   | 77428   | 82192   | 91291   | 105600  | 52.01%   |
| <b>Sex</b>              |         |         |         |         |         |         |         |         |         |         |         |          |
| Male                    | 957166  | 949817  | 1012699 | 1085992 | 1281902 | 1274150 | 1320155 | 1376332 | 1501034 | 2129754 | 2598751 | 171.50%  |
| Female                  | 1371554 | 1379005 | 1462442 | 1566587 | 1832524 | 1843597 | 1909759 | 1986582 | 2128339 | 2728127 | 3251043 | 137.03%  |
| <b>Race/Ethnicity</b>   |         |         |         |         |         |         |         |         |         |         |         |          |
| White                   | 731384  | 719852  | 754567  | 794179  | 895803  | 906345  | 922269  | 941378  | 960099  | 1382263 | 1669637 | 128.28%  |
| Black                   | 308077  | 319736  | 342370  | 377544  | 432888  | 438186  | 457551  | 482857  | 508968  | 680050  | 772846  | 150.86%  |
| Hispanic                | 1048204 | 1060758 | 1151617 | 1254527 | 1534361 | 1511196 | 1590293 | 1676984 | 1866746 | 2389237 | 2903001 | 176.95%  |
| Other                   | 181239  | 181922  | 188889  | 188165  | 218784  | 232492  | 232486  | 235241  | 257996  | 360311  | 464135  | 156.09%  |
| Unknown                 | 62094   | 46680   | 37828   | 38228   | 32669   | 29596   | 27353   | 26492   | 35637   | 46140   | 40337   | -35.04%  |

**Supplementary Table 3. California emergency department visits, 2005-2015 – privately insured**

|                         | 2005    | 2006    | 2007    | 2008    | 2009    | 2010    | 2011    | 2012    | 2013    | 2014    | 2015    | % Change |
|-------------------------|---------|---------|---------|---------|---------|---------|---------|---------|---------|---------|---------|----------|
| <b>Age group, years</b> |         |         |         |         |         |         |         |         |         |         |         |          |
| <5                      | 429459  | 408964  | 425124  | 430059  | 459516  | 418544  | 410245  | 391188  | 361352  | 340709  | 323370  | -24.70%  |
| 5-19                    | 708116  | 687035  | 692650  | 705363  | 793381  | 711824  | 723207  | 711686  | 669511  | 657252  | 638977  | -9.76%   |
| 20-44                   | 1346838 | 1326662 | 1345311 | 1351430 | 1363911 | 1281028 | 1337662 | 1387663 | 1362165 | 1460033 | 1466015 | 8.85%    |
| 45-64                   | 937683  | 950346  | 983027  | 1011740 | 1036109 | 1016319 | 1034170 | 1078507 | 1056692 | 1130772 | 1157000 | 23.39%   |
| 65+                     | 146085  | 151071  | 161534  | 172539  | 178683  | 169115  | 176849  | 180333  | 186060  | 192316  | 203422  | 39.25%   |
| <b>Sex</b>              |         |         |         |         |         |         |         |         |         |         |         |          |
| Male                    | 1663208 | 1644771 | 1683651 | 1703166 | 1770583 | 1651551 | 1690084 | 1709483 | 1652877 | 1712209 | 1737064 | 4.44%    |
| Female                  | 1900535 | 1878899 | 1923691 | 1967771 | 2060874 | 1945181 | 1991951 | 2039774 | 1982812 | 2068747 | 2051590 | 7.95%    |
| <b>Race/Ethnicity</b>   |         |         |         |         |         |         |         |         |         |         |         |          |
| White                   | 1735384 | 1764498 | 1829347 | 1838610 | 1889460 | 1763218 | 1787345 | 1804017 | 1742043 | 1764406 | 1728905 | -0.37%   |
| Black                   | 259335  | 274790  | 290607  | 294616  | 314387  | 301938  | 312298  | 322555  | 305612  | 308854  | 303153  | 16.90%   |
| Hispanic                | 819647  | 859756  | 926181  | 981879  | 1087422 | 1016798 | 1064338 | 1094322 | 1066446 | 1144353 | 1166619 | 42.33%   |
| Other                   | 330650  | 366942  | 401212  | 413098  | 446058  | 433656  | 447306  | 456385  | 449984  | 479157  | 506248  | 53.11%   |
| Unknown                 | 423165  | 258092  | 160299  | 142928  | 94273   | 81220   | 70846   | 72098   | 71695   | 84312   | 83859   | -80.18%  |

**Supplementary Table 4. Emergency department visits, 2005-2015 – Medicare insured**

|                         | 2005    | 2006    | 2007    | 2008    | 2009    | 2010    | 2011    | 2012    | 2013    | 2014    | 2015    | % Change |
|-------------------------|---------|---------|---------|---------|---------|---------|---------|---------|---------|---------|---------|----------|
| <b>Age group, years</b> |         |         |         |         |         |         |         |         |         |         |         |          |
| <5                      | 8243    | 4200    | 5373    | 6251    | 5090    | 10439   | 10503   | 11613   | 13680   | 14754   | 12550   | 52.25%   |
| 5-19                    | 10797   | 6279    | 6593    | 8337    | 7945    | 12708   | 14009   | 16263   | 19637   | 22658   | 21148   | 95.87%   |
| 20-44                   | 143152  | 140675  | 148033  | 160620  | 167879  | 179749  | 188514  | 205036  | 206723  | 215200  | 212123  | 48.18%   |
| 45-64                   | 275977  | 295922  | 318067  | 346547  | 370181  | 393129  | 420238  | 459603  | 477958  | 505885  | 522212  | 89.22%   |
| 65+                     | 1463280 | 1514311 | 1543433 | 1614298 | 1662697 | 1733959 | 1836846 | 1950094 | 2010516 | 2080691 | 2234793 | 52.72%   |
| <b>Sex</b>              |         |         |         |         |         |         |         |         |         |         |         |          |
| Male                    | 821355  | 844714  | 867868  | 917990  | 950000  | 1006743 | 1066235 | 1142955 | 1189472 | 1240239 | 1318555 | 60.53%   |
| Female                  | 1077719 | 1116566 | 1153548 | 1218014 | 1263757 | 1323213 | 1403845 | 1499617 | 1538996 | 1598904 | 1684217 | 56.28%   |
| <b>Race/Ethnicity</b>   |         |         |         |         |         |         |         |         |         |         |         |          |
| White                   | 1222354 | 1258172 | 1299775 | 1346473 | 1382103 | 1441869 | 1510711 | 1599925 | 1624635 | 1663996 | 1742676 | 42.57%   |
| Black                   | 159263  | 170620  | 181588  | 198505  | 211765  | 224865  | 238157  | 257281  | 264718  | 277381  | 290440  | 82.37%   |
| Hispanic                | 297507  | 315033  | 334522  | 371907  | 399036  | 431504  | 469415  | 517413  | 549923  | 583293  | 626736  | 110.66%  |
| Other                   | 156948  | 164791  | 176161  | 190060  | 197222  | 212005  | 231632  | 249920  | 268873  | 285875  | 315090  | 100.76%  |
| Unknown                 | 65377   | 52771   | 29453   | 29108   | 23666   | 19741   | 20195   | 18070   | 20365   | 28643   | 27884   | -57.35%  |



**Supplementary Table 5. Emergency department visits 2005-2015 – uninsured**

|                         | 2005   | 2006   | 2007   | 2008   | 2009   | 2010    | 2011    | 2012    | 2013    | 2014   | 2015   | % Change |
|-------------------------|--------|--------|--------|--------|--------|---------|---------|---------|---------|--------|--------|----------|
| <b>Age group, years</b> |        |        |        |        |        |         |         |         |         |        |        |          |
| <5                      | 115388 | 120322 | 125362 | 114960 | 120588 | 107766  | 107416  | 105162  | 106741  | 101823 | 95770  | -17.00%  |
| 5-19                    | 199444 | 209014 | 216387 | 206858 | 222832 | 199173  | 194820  | 189107  | 189898  | 165966 | 143520 | -28.04%  |
| 20-44                   | 848935 | 887578 | 913148 | 931697 | 996065 | 1015494 | 1030280 | 1055437 | 1072956 | 777655 | 587183 | -30.83%  |
| 45-64                   | 346667 | 368433 | 385732 | 411485 | 451282 | 483683  | 515769  | 509668  | 504880  | 303459 | 227679 | -34.32%  |
| 65+                     | 58608  | 35835  | 36921  | 32604  | 32677  | 32770   | 33913   | 33369   | 35478   | 37552  | 39581  | -32.46%  |
| <b>Sex</b>              |        |        |        |        |        |         |         |         |         |        |        |          |
| Male                    | 859641 | 890163 | 912620 | 922018 | 984241 | 994896  | 1018562 | 1026193 | 1028873 | 748368 | 603828 | -29.76%  |
| Female                  | 705696 | 730669 | 764579 | 775460 | 839104 | 843907  | 863567  | 866453  | 880913  | 637901 | 489743 | -30.60%  |
| <b>Race/Ethnicity</b>   |        |        |        |        |        |         |         |         |         |        |        |          |
| White                   | 593788 | 617404 | 649223 | 648562 | 697406 | 709652  | 710073  | 713594  | 695377  | 459614 | 335463 | -43.50%  |
| Black                   | 178541 | 196121 | 209552 | 221673 | 242739 | 252220  | 260977  | 257628  | 244939  | 171578 | 137722 | -22.86%  |
| Hispanic                | 584084 | 626675 | 646508 | 659205 | 719615 | 712070  | 742101  | 745133  | 795756  | 610154 | 490429 | -16.03%  |
| Other                   | 112259 | 119253 | 125578 | 125144 | 135331 | 141106  | 145983  | 148282  | 146588  | 120039 | 105257 | -6.24%   |
| Unknown                 | 100370 | 61729  | 46689  | 43020  | 28353  | 23838   | 23064   | 28106   | 27293   | 25070  | 24862  | -75.23%  |

**STROBE 2007 (v4) checklist of items to be included in reports of observational studies in epidemiology\***  
**Checklist for cohort, case-control, and cross-sectional studies (combined)**

| Section/Topic             | Item # | Recommendation                                                                                                                                                                                                                                                                                                                                                                                                                                                         | Reported on page # |
|---------------------------|--------|------------------------------------------------------------------------------------------------------------------------------------------------------------------------------------------------------------------------------------------------------------------------------------------------------------------------------------------------------------------------------------------------------------------------------------------------------------------------|--------------------|
| Title and abstract        | 1      | (a) Indicate the study's design with a commonly used term in the title or the abstract                                                                                                                                                                                                                                                                                                                                                                                 | 1                  |
|                           |        | (b) Provide in the abstract an informative and balanced summary of what was done and what was found                                                                                                                                                                                                                                                                                                                                                                    | 2                  |
| <b>Introduction</b>       |        |                                                                                                                                                                                                                                                                                                                                                                                                                                                                        |                    |
| Background/rationale      | 2      | Explain the scientific background and rationale for the investigation being reported                                                                                                                                                                                                                                                                                                                                                                                   | 4-5                |
| Objectives                | 3      | State specific objectives, including any pre-specified hypotheses                                                                                                                                                                                                                                                                                                                                                                                                      | 5                  |
| <b>Methods</b>            |        |                                                                                                                                                                                                                                                                                                                                                                                                                                                                        |                    |
| Study design              | 4      | Present key elements of study design early in the paper                                                                                                                                                                                                                                                                                                                                                                                                                | 5-6                |
| Setting                   | 5      | Describe the setting, locations, and relevant dates, including periods of recruitment, exposure, follow-up, and data collection                                                                                                                                                                                                                                                                                                                                        | 5-6                |
| Participants              | 6      | (a) <i>Cohort study</i> —Give the eligibility criteria, and the sources and methods of selection of participants. Describe methods of follow-up<br><i>Case-control study</i> —Give the eligibility criteria, and the sources and methods of case ascertainment and control selection. Give the rationale for the choice of cases and controls<br><i>Cross-sectional study</i> —Give the eligibility criteria, and the sources and methods of selection of participants | 6                  |
|                           |        | (b) <i>Cohort study</i> —For matched studies, give matching criteria and number of exposed and unexposed<br><i>Case-control study</i> —For matched studies, give matching criteria and the number of controls per case                                                                                                                                                                                                                                                 | n/a                |
| Variables                 | 7      | Clearly define all outcomes, exposures, predictors, potential confounders, and effect modifiers. Give diagnostic criteria, if applicable                                                                                                                                                                                                                                                                                                                               | 5-6                |
| Data sources/ measurement | 8*     | For each variable of interest, give sources of data and details of methods of assessment (measurement). Describe comparability of assessment methods if there is more than one group                                                                                                                                                                                                                                                                                   | 5-6                |
| Bias                      | 9      | Describe any efforts to address potential sources of bias                                                                                                                                                                                                                                                                                                                                                                                                              | n/a                |
| Study size                | 10     | Explain how the study size was arrived at                                                                                                                                                                                                                                                                                                                                                                                                                              | 6                  |
| Quantitative variables    | 11     | Explain how quantitative variables were handled in the analyses. If applicable, describe which groupings were chosen and why                                                                                                                                                                                                                                                                                                                                           | 6                  |
| Statistical methods       | 12     | (a) Describe all statistical methods, including those used to control for confounding                                                                                                                                                                                                                                                                                                                                                                                  | 6-7                |
|                           |        | (b) Describe any methods used to examine subgroups and interactions                                                                                                                                                                                                                                                                                                                                                                                                    | 6-7                |
|                           |        | (c) Explain how missing data were addressed                                                                                                                                                                                                                                                                                                                                                                                                                            | n/a                |
|                           |        | (d) <i>Cohort study</i> —If applicable, explain how loss to follow-up was addressed<br><i>Case-control study</i> —If applicable, explain how matching of cases and controls was addressed                                                                                                                                                                                                                                                                              | n/a                |

|                          |     |                                                                                                                                                                                                              |       |
|--------------------------|-----|--------------------------------------------------------------------------------------------------------------------------------------------------------------------------------------------------------------|-------|
|                          |     | <i>Cross-sectional study</i> —If applicable, describe analytical methods taking account of sampling strategy                                                                                                 |       |
|                          |     | (e) Describe any sensitivity analyses                                                                                                                                                                        | n/a   |
| <b>Results</b>           |     |                                                                                                                                                                                                              |       |
| Participants             | 13* | (a) Report numbers of individuals at each stage of study—eg numbers potentially eligible, examined for eligibility, confirmed eligible, included in the study, completing follow-up, and analysed            | 7     |
|                          |     | (b) Give reasons for non-participation at each stage                                                                                                                                                         | n/a   |
|                          |     | (c) Consider use of a flow diagram                                                                                                                                                                           | n/a   |
| Descriptive data         | 14* | (a) Give characteristics of study participants (eg demographic, clinical, social) and information on exposures and potential confounders                                                                     | 7-9   |
|                          |     | (b) Indicate number of participants with missing data for each variable of interest                                                                                                                          | n/a   |
|                          |     | (c) <i>Cohort study</i> —Summarise follow-up time (eg, average and total amount)                                                                                                                             | n/a   |
| Outcome data             | 15* | <i>Cohort study</i> —Report numbers of outcome events or summary measures over time                                                                                                                          | 7     |
|                          |     | <i>Case-control study</i> —Report numbers in each exposure category, or summary measures of exposure                                                                                                         | n/a   |
|                          |     | <i>Cross-sectional study</i> —Report numbers of outcome events or summary measures                                                                                                                           | n/a   |
| Main results             | 16  | (a) Give unadjusted estimates and, if applicable, confounder-adjusted estimates and their precision (eg, 95% confidence interval). Make clear which confounders were adjusted for and why they were included | n/a   |
|                          |     | (b) Report category boundaries when continuous variables were categorized                                                                                                                                    | n/a   |
|                          |     | (c) If relevant, consider translating estimates of relative risk into absolute risk for a meaningful time period                                                                                             | n/a   |
| Other analyses           | 17  | Report other analyses done—eg analyses of subgroups and interactions, and sensitivity analyses                                                                                                               | 8-9   |
| <b>Discussion</b>        |     |                                                                                                                                                                                                              |       |
| Key results              | 18  | Summarise key results with reference to study objectives                                                                                                                                                     | 9-10  |
| Limitations              | 19  | Discuss limitations of the study, taking into account sources of potential bias or imprecision. Discuss both direction and magnitude of any potential bias                                                   | 12-13 |
| Interpretation           | 20  | Give a cautious overall interpretation of results considering objectives, limitations, multiplicity of analyses, results from similar studies, and other relevant evidence                                   | 9-12  |
| Generalisability         | 21  | Discuss the generalisability (external validity) of the study results                                                                                                                                        | 12    |
| <b>Other information</b> |     |                                                                                                                                                                                                              |       |
| Funding                  | 22  | Give the source of funding and the role of the funders for the present study and, if applicable, for the original study on which the present article is based                                                | 14    |

\*Give information separately for cases and controls in case-control studies and, if applicable, for exposed and unexposed groups in cohort and cross-sectional studies.

**Note:** An Explanation and Elaboration article discusses each checklist item and gives methodological background and published examples of transparent reporting. The STROBE checklist is best used in conjunction with this article (freely available on the Web sites of PLoS Medicine at <http://www.plosmedicine.org/>, Annals of Internal Medicine at <http://www.annals.org/>, and Epidemiology at <http://www.epidem.com/>). Information on the STROBE Initiative is available at [www.strobe-statement.org](http://www.strobe-statement.org).
