# Supplementary material for: Trends in the utilisation of emergency departments in California, 2005–2015: a retrospective analysis
Source: PubMed Central journal article supplement — BMJ Open. 2018 Jul 23;8(7):e021392. doi: 10.1136/bmjopen-2017-021392 (PMC6059325; doi:10.1136/bmjopen-2017-021392), 2018-07-23
Supplement: bmjopen-2017-021392.reviewer_comments.pdf [file bmjopen-2017-021392.reviewer_comments.pdf]

## PEER REVIEW HISTORY

BMJ Open publishes all reviews undertaken for accepted manuscripts. Reviewers are asked to complete a checklist review form (<http://bmjopen.bmj.com/site/about/resources/checklist.pdf>) and are provided with free text boxes to elaborate on their assessment. These free text comments are reproduced below.

### ARTICLE DETAILS

|                            |                                                                                                       |
|----------------------------|-------------------------------------------------------------------------------------------------------|
| <b>TITLE (PROVISIONAL)</b> | Trends in the utilization of emergency departments in California, 2005-2015: a retrospective analysis |
| <b>AUTHORS</b>             | Hsia, Renee; Sabbagh, Sarah; Guo, Joanna; Nuckton, Thomas; Niedzwiecki, Matthew                       |

### VERSION 1 – REVIEW

|                        |                                                                           |
|------------------------|---------------------------------------------------------------------------|
| <b>REVIEWER</b>        | Prof. Dr. Matthias David<br>Charité - University Medicine Berlin, Germany |
| <b>REVIEW RETURNED</b> | 15-Jan-2018                                                               |

|                         |                                                                                                                                                                                                                                                                                                                                                                                                                                                                                                                                                                                                                                                                                                                                                                                                                                                                                                                                                                                                                                                                                                                                                                                                                                                                                                                                                                                         |
|-------------------------|-----------------------------------------------------------------------------------------------------------------------------------------------------------------------------------------------------------------------------------------------------------------------------------------------------------------------------------------------------------------------------------------------------------------------------------------------------------------------------------------------------------------------------------------------------------------------------------------------------------------------------------------------------------------------------------------------------------------------------------------------------------------------------------------------------------------------------------------------------------------------------------------------------------------------------------------------------------------------------------------------------------------------------------------------------------------------------------------------------------------------------------------------------------------------------------------------------------------------------------------------------------------------------------------------------------------------------------------------------------------------------------------|
| <b>GENERAL COMMENTS</b> | <p>The article considers a very important topic. For years the utilization of emergency departments is globally increasing in the industrial countries. Reasons for this and consequential necessary structural changes should be investigated.</p> <p>Following questions should be answered by the authors and following changes should be done in the manuscript:</p> <ol style="list-style-type: none"><li>1) The study refers only to the health system in the U. S. and the state California which is clearly limiting the validity and generalizability. This is a crucial limitation.</li><li>2) Which is the main research hypothesis?</li><li>3) Why was the 11-year-interval 2005-2015 chosen?</li><li>4) How reliable and exact are the register data (PDD, EDD, OSHPD)?</li><li>5) How were “multiple user” of emergency departments (one person utilizes one or more emergency departments repeatedly per year) considered or excluded?</li><li>6) Please divide the main diagnoses (page 8/9) at least in women and men, as appropriate furthermore by age groups.</li><li>7) The discussion part is clearly too long. Please shorten/cancel at least one page.</li><li>8) In “Limitations” absolutely point out the retrospective character of the study.</li><li>9) The references are with almost 70 sources very long.</li><li>10) Table 2 is dispensable.</li></ol> |
|-------------------------|-----------------------------------------------------------------------------------------------------------------------------------------------------------------------------------------------------------------------------------------------------------------------------------------------------------------------------------------------------------------------------------------------------------------------------------------------------------------------------------------------------------------------------------------------------------------------------------------------------------------------------------------------------------------------------------------------------------------------------------------------------------------------------------------------------------------------------------------------------------------------------------------------------------------------------------------------------------------------------------------------------------------------------------------------------------------------------------------------------------------------------------------------------------------------------------------------------------------------------------------------------------------------------------------------------------------------------------------------------------------------------------------|

|                 |                                                           |
|-----------------|-----------------------------------------------------------|
| <b>REVIEWER</b> | Lauren Birmingham<br>Kent State University, United States |
|-----------------|-----------------------------------------------------------|

|                         |                                                                                                                                                                                                                                                                                                                                                                                                                                                                                                                                                                                                                                                                                                                                                                                                                                                                                                                                                                                                                                                                                                                                                                                                                                                                                                                                                                                                                                                                                                                                                                                                                                                                                                                                                                                            |
|-------------------------|--------------------------------------------------------------------------------------------------------------------------------------------------------------------------------------------------------------------------------------------------------------------------------------------------------------------------------------------------------------------------------------------------------------------------------------------------------------------------------------------------------------------------------------------------------------------------------------------------------------------------------------------------------------------------------------------------------------------------------------------------------------------------------------------------------------------------------------------------------------------------------------------------------------------------------------------------------------------------------------------------------------------------------------------------------------------------------------------------------------------------------------------------------------------------------------------------------------------------------------------------------------------------------------------------------------------------------------------------------------------------------------------------------------------------------------------------------------------------------------------------------------------------------------------------------------------------------------------------------------------------------------------------------------------------------------------------------------------------------------------------------------------------------------------|
| <b>REVIEW RETURNED</b>  | 26-Jan-2018                                                                                                                                                                                                                                                                                                                                                                                                                                                                                                                                                                                                                                                                                                                                                                                                                                                                                                                                                                                                                                                                                                                                                                                                                                                                                                                                                                                                                                                                                                                                                                                                                                                                                                                                                                                |
| <b>GENERAL COMMENTS</b> | <p>Summary: This manuscript presents an overview of emergency department (ED) utilization trends and ED user characteristics in California from 2005-2015.</p> <p>*Methods: How were hospital observation visits categorized? (hospital admission vs. treat &amp; release). Clarify in Methods section. Utilization of observation services has grown overtime--thus the classification of observation visits could impact the trends that were being assessed in this manuscript.</p> <p>*Discussion and Abstract Conclusion: The abstract conclusion states "Our findings reveal considerable unmet healthcare needs and suggest that policies or programs aimed at increasing regular healthcare access among specific patient groups may have the potential to lessen demands on EDs...". I understand the argument made on page 12-- that the relatively low number of ED visits made by Hispanics is likely due to the reasons cited (language barriers, fear of deportation, etc.). However, "unmet healthcare needs" are really the gap between care that is received and care that is *needed*. I'm not sure the authors thoroughly demonstrated that these ED services were truly needed--thus, I would suggest tempering the argument that the findings "reveal considerable unmet healthcare needs". This conclusion is potentially overstated, given the data. We know there is a lot of waste in healthcare, so it may not be correct to assume that all ED visits are needed, and thus, that any population using a relatively lower level of ED visits is experiencing unmet healthcare need.</p> <p>*Abstract Primary and Secondary Outcome Measures: The word "the" is missing from the last sentence. It should precede the word "proportion" in the last sentence.</p> |

|                        |                                                                                      |
|------------------------|--------------------------------------------------------------------------------------|
| <b>REVIEWER</b>        | Erika H. Newton, MD, MPH<br>Dept. of Emergency Medicine, Stony Brook University, USA |
| <b>REVIEW RETURNED</b> | 31-Jan-2018                                                                          |

|                         |                                                                                                                                                                                                                                                                                                                                                                                                                                                                                                                                                                                                                                                                                                                                                                                                                                                                                                                                                                                                                                                                                                                                                                      |
|-------------------------|----------------------------------------------------------------------------------------------------------------------------------------------------------------------------------------------------------------------------------------------------------------------------------------------------------------------------------------------------------------------------------------------------------------------------------------------------------------------------------------------------------------------------------------------------------------------------------------------------------------------------------------------------------------------------------------------------------------------------------------------------------------------------------------------------------------------------------------------------------------------------------------------------------------------------------------------------------------------------------------------------------------------------------------------------------------------------------------------------------------------------------------------------------------------|
| <b>GENERAL COMMENTS</b> | <p>General Comments</p> <p>The study is amply justified, well conceived and executed, and should be published. The quality of the writing is strong. The methodology is straightforward and is appropriate to the purpose. The Results are well served by the primary tables and figure, with additional tables available in an Appendix.</p> <p>I have 3 main comments.</p> <p>The authors don't make clear whether or how their study findings are meant to be extrapolated at the national level. California certainly serves as a cautionary example of how statewide initiatives can fail to go far enough. But as the study reveals (p. 9 line 49 to p. 10 line 3), the state's recent ED visit trends are not representative of national ones - with California's visit rate far lower and rising far faster. It also has among the highest proportions of Medicaid-insured. We are told, furthermore, that "state-level examinations of the association between health insurance and ED use...have yielded complex and often conflicting results" (p. 4 lines 51-56) - and are not told just how another state-level study would be different. According</p> |
|-------------------------|----------------------------------------------------------------------------------------------------------------------------------------------------------------------------------------------------------------------------------------------------------------------------------------------------------------------------------------------------------------------------------------------------------------------------------------------------------------------------------------------------------------------------------------------------------------------------------------------------------------------------------------------------------------------------------------------------------------------------------------------------------------------------------------------------------------------------------------------------------------------------------------------------------------------------------------------------------------------------------------------------------------------------------------------------------------------------------------------------------------------------------------------------------------------|

to the source here cited by the authors (reference #26), these “complex and conflicting results” seen to date stem from the intrinsic complexity of the relationship between ED use and insurance type - a function of factors that go beyond those addressed in this study. The authors provide a thoughtful interpretation of the interplay between insurance type, age, and ED utilization for the 45-64 vs > 65 age groups in particular (p. 10 lines 10-35), and the data here are intriguing. Their applicability to the national experience, however, remains speculative.

The findings with regard to payer cannot be overstated (p. 11 lines 46-56): Medicaid patients lead in all categories of ED utilization (highest use, highest use rates, and, overwhelmingly, fastest-growing use rates). It would therefore be helpful if this finding were analyzed in greater depth. In particular, do rising utilization rates by Medicaid patients parallel increasing Medicaid enrolment numbers in California during the study period (particularly in 2009, 2014, 2015)? If so, there is evidence of increased ED utilization by new Medicaid enrollees but which may be temporary, and would be important to factor in. (Lo N, Roby DH, Padilla J et al, Increased service use following Medicaid expansion is mostly temporary: evidence from California’s Low Income Health Program. Policy Brief UCLA Cent Health Policy Res. 2014 Oct;(PB2014-7):1-8).

The authors devote several paragraphs of their Discussion (p. 10 line 10 to p. 11 line 45) to examining the role of age. They conclude that particular need exists among children (noting the high ED utilization rate for age < 5 and high ED visit growth for age 5-19) and the elderly (with the next highest rate), but also among those 45-65 (lowest but fastest-growing rate). But with most age groups signaling need by one measure or another, age as a factor seems to lose force - particularly when the remaining group, those age 20-44, tops the charts in terms of sheer visit numbers. Greater clarification of the relative significance of each measure would help - or else an acknowledgement that healthcare need was found to exist across the age spectrum, albeit for a range of reasons. In the latter case, the section on age could be streamlined & shortened.

#### Minor Comments

-Abstract, p. 2 line 33:  
Suggest changing to “the annual number of ED visits”

-Methods, p. 5 line 33:  
Suggest changing to “non-public”

-Discussion, p. 9 line 56:  
Suggest changing “unique” to “unusual”

-Discussion, p. 12 line 28:  
Suggest changing to “were to emergency physicians”

-Conclusions, p. 14 line 30:  
Suggest changing to “Our findings suggest that the demand for emergency care continues to rise...”

-Table 1, p. 27 line 3:  
Title seems underspecified. Suggest changing to “Descriptive characteristics of California emergency...”

|  |                                                                                                                                                                                                                                                                                                                                                                                                                                              |
|--|----------------------------------------------------------------------------------------------------------------------------------------------------------------------------------------------------------------------------------------------------------------------------------------------------------------------------------------------------------------------------------------------------------------------------------------------|
|  | <p>-Table 2, p. 28 line 3:<br/>Ditto. Suggest changing to “California emergency department...”</p> <p>-Tables 1 &amp; 2, pp. 27, 28:<br/>Suggest omitting P-values, as no hypothesis is being tested.</p> <p>-Figure 1, p. 29 line 7, line 26:<br/>Suggest changing title to “Proportion of ED visits resulting in admission vs. discharge” and legend text to “Proportion of ED visits resulting in admission vs. discharge, 2005-2015”</p> |
|--|----------------------------------------------------------------------------------------------------------------------------------------------------------------------------------------------------------------------------------------------------------------------------------------------------------------------------------------------------------------------------------------------------------------------------------------------|

**VERSION 1 – AUTHOR RESPONSE**

**Reviewer #1:**

The article considers a very important topic. For years the utilization of emergency departments is globally increasing in the industrial countries. Reasons for this and consequential necessary structural changes should be investigated.

Following questions should be answered by the authors and following changes should be done in the manuscript:

1. The study refers only to the health system in the U.S. and the state California which is clearly limiting the validity and generalizability. This is a crucial limitation.

We agree with this comment. Although we had already pointed out this limitation in our manuscript, we revised our sentence in the Limitations section on page 12 to now read:

“Second, our data are limited to California residents and may limit the generalizability and applicability of our results on a national or global level, despite California’s diverse and high Medicaid-insured population.”

2. Which is the main research hypothesis?

We have added our main research hypothesis in the Introduction section on page 5, which states:

“We hypothesized that ED visit rates would increase between 2005 and 2015, particularly among minority, Medicaid-insured, and uninsured patients.”

3. Why was the 11-year-interval 2005-2015 chosen?

We chose this 11-year interval as our study period because 2005 is the earliest year for which ED data is available; prior to 2005, OSHPD did not require hospitals to submit ED data, and therefore, 2005 marks the first year of our study. 2015 was the most recent year of OSHPD data we had when we conducted the study.

4. How reliable and exact are the register data (PDD, EDD, OSHPD)?

The OSHPD data have been used in more than 250 publications and have guided health policy decisions in California and nationally. While administrative datasets typically have sparse patient-level data, the California OSHPD data contains a wealth of information at the patient level. All non-federal hospitals in California electronically report patient data directly to OSHPD every six months, where it undergoes a nine-step process to check for errors and ensure coding accuracy.<sup>1,2,3</sup> The details of this reporting and error-checking process are provided by the State of California,<sup>4,5</sup> and the validity of certain variables in these data has been confirmed by several independent studies that found a relatively high-degree of coding accuracy, with the caveat that the risk of unreliability is higher for small sample sizes.<sup>6,7,8</sup>

OSHPD collects facility-level data from over 6,000 healthcare facilities, including hospitals, long-term care facilities, clinics, home health agencies, and hospices. OSHPD also receives demographic and utilization data on almost 16 million patients.<sup>9</sup>

---

<sup>1</sup> State of California - Office of Statewide Health Planning and Development. MIRCAl Inpatient Edit Flag

Description Guide. 2015;

[http://www.oshpd.ca.gov/HID/MIRCAl/Text\\_pdfs/ManualsGuides/PEditFlagDescGuide.pdf](http://www.oshpd.ca.gov/HID/MIRCAl/Text_pdfs/ManualsGuides/PEditFlagDescGuide.pdf). Accessed.

<sup>2</sup> State of California - Office of Statewide Health Planning and Development. MIRCAl ED and AS Edit

Flag Description Guide. 2014;

[http://www.oshpd.ca.gov/HID/MIRCAl/Text\\_pdfs/ManualsGuides/EDASEditFlagDescGuide.pdf](http://www.oshpd.ca.gov/HID/MIRCAl/Text_pdfs/ManualsGuides/EDASEditFlagDescGuide.pdf).

<sup>3</sup> State of California - Office of Statewide Health Planning and Development. Medical Information

Reporting for California (MIRCAl) - Manuals and Guides. 2015;

<http://www.oshpd.ca.gov/HID/MIRCAl/ManualsGuides.html>.

<sup>4</sup> State of California - Office of Statewide Health Planning and Development. MIRCAl - Medical

Information Reporting for California. 2015; <http://www.oshpd.ca.gov/HID/MIRCAl/>.

<sup>5</sup> State of California - Office of Statewide Health Planning and Development. MIRCAl - Data Collection

Programs. 2012; <http://www.oshpd.ca.gov/HID/MIRCAl/DataCollection.html>.

<sup>6</sup> Haas J, Luft H, Romano PS, Dean M, Hung Y, Bacchetti P. Community-Acquired Pneumonia, 1996:

Model Development and Validation. California Hospital Outcomes Project - California Office of

Statewide Health Planning and Development;2000.

<sup>7</sup> Goldman L, Chu P, Prothro C, Osmond D, Bindman A. Accuracy of Condition Present on Admission,

Do Not Resuscitate, and E-Codes in California Patient Discharge Data. California Office of Statewide

Health Planning and Development - Health Outcomes Center;2011.

<sup>8</sup> Romano PS, Rainwater JA, Michael ES, Yasmeeen S, Wiiliam MG, Nina B, Nancy F. OSHPD

Postpartum Maternal Outcomes Validation Study. University of California, Davis;2006.

<sup>9</sup> OSHPD. Data and Reports; 2017. <https://www.oshpd.ca.gov/HID/>

Although OSHPD collects self-reported data from hospitals, any reporting errors are mitigated by routine accuracy checks by the hospitals, which we have explained in more detail in the Limitations section on page 12:

“First, OSHPD collects retrospective, self-reported data from hospitals, which could introduce potential reporting errors or missing data; however, hospitals submit routine accuracy checks using OSHPD’s Medical Information Reporting for California (MIRCal) online system, which reduces such errors.”

5. How were “multiple users” of emergency departments (one person utilizes one or more emergency departments repeatedly per year) considered or excluded?

We included multiple users of EDs in our study. In fact, this is one of the strengths of our study, because we were able to evaluate all ED visits in California from 2005 to 2015 and account for users who frequented more than one ED.

6. Please divide the main diagnoses (page 8/9) at least in women and men, as appropriate furthermore by age groups.

We have divided the main diagnoses by sex and age, and included the results as tables at the end of this “Response to Reviewers” document (Response to Reviewers Tables 1 and 2). We did not find any notable or striking findings in these results that would warrant any further significant discussion, and since we shortened our Discussion section based on the reviewers’ suggestions, we decided not to include these results in our main paper. However, if the Editor finds it important and noteworthy to include a section about diagnoses stratified by sex and age in the paper, we are happy to do so.

7. The discussion part is clearly too long. Please shorten/cancel at least one page.

Thank you for your comment. We have now shortened our Discussion section, specifically by streamlining our discussion on ED visits and the role of age, and removing the paragraph discussing ED visits by Medicare patients (since we wanted to focus on our main results and highlight the trends among Medicaid and uninsured patients instead). We are happy to make any additional edits if the reviewer and Editor prefer that we shorten the Discussion section even further.

8. In "Limitations" absolutely point out the retrospective character of the study.

We have clarified this limitation in the Limitations section on page 12 as follows:

"First, OSHPD collects retrospective, self-reported data from hospitals, which could introduce potential reporting errors or missing data; however, hospitals submit routine accuracy checks using OSHPD's Medical Information Reporting for California (MIRCal) online system, which reduces such errors."

9. The references are with almost 70 sources very long.

We agree with this suggestion and have now limited our references to 41 sources.

10. Table 2 is dispensable.

Thank you for your comment. We have decided to keep this table on ED visit rates (currently Table 1 in the revised manuscript) as the main table of our paper, since we believe that the results are prominent and relevant given that they are based on population estimates. To address the request for condensing the tables, we have moved the table on descriptive characteristics of ED visits (previously Table 1; currently Supplementary Table 1) to the Appendix so that our results on ED visit *rates* are highlighted as the focus of the paper. However, if the Editor feels strongly about this request, we would be happy to oblige.

**Reviewer #2:**

Summary: This manuscript presents an overview of emergency department (ED) utilization trends and ED user characteristics in California from 2005-2015.

11. Methods: How were hospital observation visits categorized? (hospital admission vs. treat & release). Clarify in Methods section. Utilization of observation services has grown overtime-- thus the classification of observation visits could impact the trends that were being assessed in this manuscript.

All observation stays that initially came through the ED – whether they were admitted to the inpatient setting or were discharged directly from the ED – were captured in our dataset. Our dataset is derived by merging a dataset that contains visits that are directly discharged from the ED with another dataset that contains admitted patients,

from which we select those who entered via the ED. As a result, regardless of whether a hospital keeps its observation stays in the ED or in the inpatient setting, we can capture both (and they will not be double-counted since those datasets are mutually exclusive).

We clarified this point in our Methods section under “Inclusion Criteria and Variable Definition” on page 6 by including the following sentence:

“All observation stays that initially came through the ED – whether they were admitted to the inpatient setting or discharged directly from the ED – were captured in our dataset.”

12. Discussion and Abstract Conclusion: The abstract conclusion states "Our findings reveal considerable unmet healthcare needs and suggest that policies or programs aimed at increasing regular healthcare access among specific patient groups may have the potential to lessen demands on EDs..." I understand the argument made on page 12-- that the relatively low number of ED visits made by Hispanics is likely due to the reasons cited (language barriers, fear of deportation, etc.). However, "unmet healthcare needs" are really the gap between care that is received and care that is \*needed\*. I'm not sure the authors thoroughly demonstrated that these ED services were truly needed--thus, I would suggest tempering the argument that the findings "reveal considerable unmet healthcare needs". This conclusion is potentially overstated, given the data. We know there is a lot of waste in healthcare, so it may not be correct to assume that all ED visits are needed, and thus, that any population using a relatively lower level of ED visits is experiencing unmet healthcare needs.

Thank you for this comment. We have deleted the phrase “reveal considerable unmet healthcare needs...” to avoid any overstatement of our results. We have revised the Conclusions section of our Abstract on page 2 to read:

“Our findings reveal an increasing demand for emergency care and may reflect current limitations in accessing care in other parts of the healthcare system. Policymakers may need to recognize the increasingly vital role that EDs are playing in the provision of care and consider ways to incorporate this changing reality into the delivery of health services.”

We have also deleted the mention of “unmet healthcare needs in our Conclusions section on page 12, and the sentence now reads:

“Increased ED visit rates by Medicaid-insured and uninsured patients may reflect current limitations in accessing care in other parts of the healthcare system.”



There were other parts of the paper (in the Objectives sentence of the Abstract section and other parts of the Discussion section) that mentioned “unmet needs,” which we have now been deleted to remain consistent throughout the paper.

13. Abstract Primary and Secondary Outcome Measures: The word "the" is missing from the last sentence. It should precede the word "proportion" in the last sentence.

Done.

**Reviewer #3:**

The study is amply justified, well-conceived and executed, and should be published. The quality of the writing is strong. The methodology is straightforward and is appropriate to the purpose. The Results are well served by the primary tables and figure, with additional tables available in an Appendix.

I have 3 main comments.

14. The authors don't make clear whether or how their study findings are meant to be extrapolated at the national level. California certainly serves as a cautionary example of how statewide initiatives can fail to go far enough. But as the study reveals (p. 9 line 49 to p. 10 line 3), the state's recent ED visit trends are not representative of national ones - with California's visit rate far lower and rising far faster. It also has among the highest proportions of Medicaid-insured. We are told, furthermore, that “state-level examinations of the association between health insurance and ED use...have yielded complex and often conflicting results” (p. 4 lines 51-56) - and are not told just how another state-level study would be different. According to the source here cited by the authors (reference #26), these “complex and conflicting results” seen to date stem from the intrinsic complexity of the relationship between ED use and insurance type - a function of factors that go beyond those addressed in this study. The authors provide a thoughtful interpretation of the interplay between insurance type, age, and ED utilization for the 45-64 vs > 65 age groups in particular (p. 10 lines 10-35), and the data here are intriguing. Their applicability to the national experience, however, remains speculative.

We appreciate the reviewer's thoughts on this. We have addressed this comment by expanding on our second limitation in the Limitations section on page 12 as follows:

“Second, our data are limited to California residents and may limit the generalizability and applicability of our results on a national or global level, despite California's diverse and high Medicaid-insured population.”

Our paper differs from other state-level studies that have examined ED utilization by focusing on a more comprehensive assessment of ED use and patient demographics in California – one of the largest and most diverse states in the country – over an 11-year period, and not just in the context of the Affordable Care Act implementation.

Though we have mentioned this in our first submission, we have clarified this point more clearly in the Introduction section on pages 4-5, which now reads:

“Although evaluating the impact of the ACA on healthcare utilization and outcomes remains an important task, our study provides a more comprehensive assessment of how patient characteristics and healthcare needs have changed over an 11-year period in California – one of the largest and most diverse states in the country[17] – to help better design the necessary policies and programs to meet patients’ healthcare needs. Additionally, California’s initiatives to increase enrollment in Medicaid (a government health insurance program for qualified low-income or disabled people) through the ACA and Low Income Health Programs (LIHP) provide a unique opportunity to study how patient characteristics and healthcare needs have changed over time under continual and gradual efforts to increase healthcare access.”

15. The findings with regard to payer cannot be overstated (p. 11 lines 46-56): Medicaid patients lead in all categories of ED utilization (highest use, highest use rates, and, overwhelmingly, fastest-growing use rates). It would therefore be helpful if this finding were analyzed in greater depth. In particular, do rising utilization rates by Medicaid patients parallel increasing Medicaid enrolment numbers in California during the study period (particularly in 2009, 2014, 2015)? If so, there is evidence of increased ED utilization by new Medicaid enrollees but which may be temporary, and would be important to factor in. (Lo N, Roby DH, Padilla J et al, Increased service use following Medicaid expansion is mostly temporary: evidence from California’s Low Income Health Program. Policy Brief UCLA Cent Health Policy Res. 2014 Oct;(PB2014-7):1-8).

Thank you for this insightful comment. Our results on the rising ED visit rates among patients insured by Medicaid do indeed take into account the increasing Medicaid enrollment numbers in California during the study period, as we calculated ED visit rates by denominating the absolute number of ED visits by patients with Medicaid as their expected payer (numerator) by the Medicaid population in California (denominator).

It is possible that Medicaid enrollees are sicker and therefore could be contributing to the increase in ED visit rates, as current literature has supported this phenomenon,<sup>10</sup> and it is also possible that this increase is temporary, as suggested by the policy brief that the reviewer referenced. However, since our study period ended in 2015 and we did not follow up on patients over time, we cannot definitively comment on whether or not this trend is temporary.

16. The authors devote several paragraphs of their Discussion (p. 10 line 10 to p. 11 line 45) to examining the role of age. They conclude that particular need exists among children (noting the high ED utilization rate for age < 5 and high ED visit growth for age 5-19) and the elderly (with the next highest rate), but also among those 45-65 (lowest but fastest-growing rate). But

---

<sup>10</sup>Taubman SL, Allen HL, Wright BJ, et al. Medicaid increases emergency-department use: evidence from Oregon’s health insurance experiment. *Science* 2014;343:263-8.

with most age groups signaling need by one measure or another, age as a factor seems to lose force - particularly when the remaining group, those age 20-44, tops the charts in terms of sheer visit numbers. Greater clarification of the relative significance of each measure would help - or else an acknowledgement that healthcare need was found to exist across the age spectrum, albeit for a range of reasons. In the latter case, the section on age could be streamlined & shortened.

Thank you for this comment. We agree that these several paragraphs on age can be streamlined and shortened, which we have done in the revised manuscript. The discussion on the role of age in the Discussion section on pages 9-10 now reads:

“Our findings are consistent with previous studies,[8,10,15] and suggest that healthcare needs tend to exist across the entire age spectrum, albeit for a range of reasons. Patients aged less than 5 had the highest ED utilization rate as of 2015, outpacing the ED utilization rate for patients 65 and over. This finding, along with the high ED visit rate growth for patients aged 5-19, potentially suggests a need for coordinated acute care for the pediatric population, as well as the need to re-examine the availability and role of EDs equipped to treat children, particularly among underinsured pediatric patients. On the other hand, while patients aged 45-64 had the lowest overall ED visit rate during the study period, this group experienced the greatest ED utilization rate increase. This suggests that patients nearing 65 may have significant health care needs, given prior evidence of sharp increases in healthcare utilization once patients turned 65 years old.[26] Meanwhile, patients aged 65 and over retained high steady ED visit rates.[27] The consistent high ED utilization rates and current trends in providers who refer elderly patients to the ED [28,29] suggests a need for improving geriatric care at a systemic level to treat elderly patients effectively and in a timely manner.”

#### Minor Comments

17. Abstract, p. 2 line 33: Suggest changing to “the annual number of ED visits.”

Done.

18. Methods, p. 5 line 33: Suggest changing to “non-public.”

Done.

19. Discussion, p. 9 line 56: Suggest changing “unique” to “unusual.”

We have now removed this sentence to help streamline and shorten the Discussion section as the reviewers suggested.

20. Discussion, p. 12 line 28: Suggest changing to “were to emergency physicians.”

Done.

21. Conclusions, p. 14 line 30: Suggest changing to “Our findings suggest that the demand for emergency care continues to rise...”

Done.

22. Table 1, p. 27 line 3: Title seems underspecified. Suggest changing to “Descriptive characteristics of California emergency...”

Done. Please note that this table has now been moved to the Appendix and re-labeled as Supplementary Table 1.

23. Table 2, p. 28 line 3: Ditto. Suggest changing to “California emergency department...”

Done. Please note that this title has now been re-labeled as Table 1.

24. Tables 1 & 2, pp. 27, 28: Suggest omitting P-values, as no hypothesis is being tested.

Per Reviewer 1’s suggestion, we have now added a hypothesis, and thus have kept the p-values in our tables.

25. Figure 1, p. 29 line 7, line 26: Suggest changing title to “Proportion of ED visits resulting in admission vs. discharge” and legend text to “Proportion of ED visits resulting in admission vs. discharge, 2005-2015.”

To make the figure title consistent with the table titles, we have now changed the title of Figure 1 to: “Proportion of California emergency department visits resulting in admission vs. discharge, 2005-2015.”

**Response to Reviewers Table 1. California emergency department visits by diagnosis and sex, 2005-2015**

|                                          | 2005 | 2006 | 2007 | 2008 | 2009 | 2010 | 2011 | 2012 | 2013 | 2014 | 2015 |
|------------------------------------------|------|------|------|------|------|------|------|------|------|------|------|
| <b>Infectious and parasitic diseases</b> |      |      |      |      |      |      |      |      |      |      |      |

|                                                       |            |            |            |            |            |            |            |            |            |            |            |
|-------------------------------------------------------|------------|------------|------------|------------|------------|------------|------------|------------|------------|------------|------------|
| <b>Male</b>                                           | 1220<br>02 | 1191<br>77 | 1202<br>70 | 1347<br>32 | 1686<br>57 | 1440<br>92 | 1561<br>43 | 1704<br>33 | 1818<br>35 | 2113<br>37 | 2319<br>14 |
| <b>Female</b>                                         | 1275<br>12 | 1235<br>33 | 1255<br>15 | 1401<br>82 | 1781<br>90 | 1507<br>58 | 1647<br>97 | 1765<br>35 | 1907<br>04 | 2186<br>53 | 2389<br>92 |
| <b>Unknown</b>                                        | 676        | 13         | 14         | 9          | 9          | 6          | 2          | 7          | 9          | 12         | 19         |
| <b>Neoplasms</b>                                      |            |            |            |            |            |            |            |            |            |            |            |
| <b>Male</b>                                           | 2786<br>5  | 2806<br>1  | 2839<br>0  | 2843<br>0  | 2842<br>4  | 2898<br>5  | 2986<br>7  | 3010<br>2  | 3039<br>7  | 3078<br>2  | 3192<br>0  |
| <b>Female</b>                                         | 3339<br>0  | 3346<br>0  | 3390<br>6  | 3518<br>7  | 3554<br>7  | 3630<br>6  | 3701<br>5  | 3752<br>6  | 3813<br>1  | 3967<br>5  | 4108<br>3  |
| <b>Unknown</b>                                        | 42         | 3          | 0          | 2          | 3          | 0          | 0          | 0          | 0          | 0          | 1          |
| <b>Endocrine disorders</b>                            |            |            |            |            |            |            |            |            |            |            |            |
| <b>Male</b>                                           | 9997<br>1  | 1066<br>97 | 1109<br>19 | 1133<br>39 | 1181<br>91 | 1198<br>99 | 1252<br>23 | 1301<br>61 | 1336<br>32 | 1387<br>95 | 1460<br>86 |
| <b>Female</b>                                         | 1078<br>06 | 1133<br>67 | 1194<br>48 | 1200<br>75 | 1244<br>90 | 1236<br>70 | 1293<br>37 | 1337<br>72 | 1361<br>05 | 1379<br>02 | 1437<br>55 |
| <b>Unknown</b>                                        | 722        | 15         | 16         | 9          | 7          | 3          | 4          | 5          | 6          | 6          | 5          |
| <b>Diseases of the blood and blood-forming organs</b> |            |            |            |            |            |            |            |            |            |            |            |
| <b>Male</b>                                           | 1669<br>6  | 1776<br>0  | 1871<br>9  | 2079<br>6  | 2242<br>1  | 2260<br>1  | 2432<br>0  | 2589<br>1  | 2642<br>5  | 2778<br>9  | 2856<br>6  |
| <b>Female</b>                                         | 2351<br>0  | 2531<br>5  | 2741<br>4  | 3119<br>5  | 3324<br>7  | 3410<br>0  | 3736<br>3  | 3976<br>2  | 3977<br>0  | 4196<br>0  | 4337<br>9  |
| <b>Unknown</b>                                        | 63         | 2          | 0          | 1          | 1          | 0          | 1          | 1          | 1          | 0          | 0          |
| <b>Mental illness</b>                                 |            |            |            |            |            |            |            |            |            |            |            |
| <b>Male</b>                                           | 2171<br>31 | 2160<br>68 | 2266<br>15 | 2427<br>38 | 2564<br>24 | 2759<br>56 | 2921<br>05 | 3218<br>55 | 3370<br>28 | 3665<br>27 | 3923<br>42 |
| <b>Female</b>                                         | 1894<br>78 | 1900<br>48 | 1990<br>85 | 2126<br>31 | 2228<br>68 | 2346<br>14 | 2423<br>08 | 2656<br>52 | 2710<br>73 | 2955<br>54 | 3054<br>02 |
| <b>Unknown</b>                                        | 1842       | 64         | 45         | 28         | 11         | 13         | 14         | 18         | 72         | 71         | 72         |
| <b>Diseases of the nervous system</b>                 |            |            |            |            |            |            |            |            |            |            |            |
| <b>Male</b>                                           | 3577<br>66 | 3642<br>06 | 3861<br>91 | 4069<br>47 | 4418<br>02 | 4459<br>09 | 4508<br>34 | 4605<br>01 | 4694<br>98 | 4887<br>43 | 5237<br>44 |
| <b>Female</b>                                         | 4791<br>58 | 4911<br>71 | 5222<br>42 | 5518<br>00 | 5998<br>98 | 6098<br>06 | 6227<br>37 | 6432<br>46 | 6548<br>48 | 6889<br>98 | 7201<br>66 |

|                                                     |            |            |            |            |            |            |            |            |            |            |            |
|-----------------------------------------------------|------------|------------|------------|------------|------------|------------|------------|------------|------------|------------|------------|
| <b>Unknown</b>                                      | 3295       | 79         | 53         | 30         | 43         | 25         | 15         | 26         | 27         | 34         | 41         |
| <b>Diseases of the circulatory system</b>           |            |            |            |            |            |            |            |            |            |            |            |
| <b>Male</b>                                         | 4070<br>60 | 4109<br>26 | 4228<br>51 | 4364<br>75 | 4500<br>36 | 4685<br>72 | 4861<br>83 | 5093<br>45 | 5116<br>76 | 5299<br>34 | 5667<br>75 |
| <b>Female</b>                                       | 4450<br>17 | 4470<br>55 | 4591<br>72 | 4730<br>08 | 4915<br>94 | 5001<br>81 | 5206<br>66 | 5503<br>51 | 5367<br>98 | 5561<br>87 | 5852<br>78 |
| <b>Unknown</b>                                      | 1936       | 69         | 70         | 33         | 30         | 22         | 15         | 25         | 39         | 44         | 36         |
| <b>Diseases of the respiratory system</b>           |            |            |            |            |            |            |            |            |            |            |            |
| <b>Male</b>                                         | 6457<br>30 | 5973<br>97 | 6170<br>13 | 6552<br>03 | 8025<br>11 | 7115<br>09 | 7304<br>53 | 7082<br>05 | 7607<br>35 | 7662<br>95 | 8583<br>50 |
| <b>Female</b>                                       | 7119<br>24 | 6527<br>14 | 6720<br>61 | 7233<br>17 | 8862<br>46 | 7879<br>21 | 8119<br>71 | 7807<br>14 | 8446<br>56 | 8566<br>74 | 9615<br>88 |
| <b>Unknown</b>                                      | 4573       | 122        | 96         | 59         | 50         | 31         | 27         | 30         | 24         | 35         | 41         |
| <b>Diseases of the digestive system</b>             |            |            |            |            |            |            |            |            |            |            |            |
| <b>Male</b>                                         | 3441<br>65 | 3766<br>27 | 3833<br>42 | 3815<br>31 | 4011<br>11 | 4005<br>50 | 4234<br>48 | 4413<br>94 | 4545<br>36 | 4769<br>59 | 5089<br>46 |
| <b>Female</b>                                       | 4015<br>16 | 4422<br>78 | 4498<br>19 | 4516<br>92 | 4780<br>05 | 4812<br>91 | 5072<br>52 | 5342<br>73 | 5478<br>72 | 5717<br>80 | 6064<br>24 |
| <b>Unknown</b>                                      | 1866       | 59         | 49         | 27         | 20         | 18         | 12         | 19         | 18         | 18         | 24         |
| <b>Diseases of the genitourinary system</b>         |            |            |            |            |            |            |            |            |            |            |            |
| <b>Male</b>                                         | 1859<br>40 | 1938<br>36 | 2001<br>44 | 2074<br>84 | 2178<br>49 | 2223<br>25 | 2327<br>28 | 2459<br>59 | 2545<br>68 | 2746<br>88 | 2925<br>52 |
| <b>Female</b>                                       | 3730<br>06 | 3888<br>76 | 4033<br>58 | 4245<br>26 | 4518<br>96 | 4661<br>12 | 4919<br>45 | 5160<br>23 | 5304<br>64 | 5780<br>07 | 6084<br>58 |
| <b>Unknown</b>                                      | 1703       | 53         | 61         | 11         | 12         | 15         | 9          | 18         | 12         | 17         | 24         |
| <b>Complications of pregnancy</b>                   |            |            |            |            |            |            |            |            |            |            |            |
| <b>Male</b>                                         | 68         | 77         | 72         | 43         | 25         | 21         | 12         | 16         | 20         | 24         | 25         |
| <b>Female</b>                                       | 2414<br>72 | 2670<br>11 | 2886<br>93 | 2905<br>84 | 3025<br>42 | 3116<br>23 | 3117<br>96 | 3225<br>50 | 3327<br>65 | 3501<br>27 | 3585<br>38 |
| <b>Unknown</b>                                      | 1089       | 27         | 27         | 0          | 2          | 3          | 1          | 0          | 2          | 0          | 10         |
| <b>Diseases of the skin and subcutaneous tissue</b> |            |            |            |            |            |            |            |            |            |            |            |
| <b>Male</b>                                         | 1888<br>97 | 1968<br>92 | 1954<br>77 | 1934<br>03 | 1974<br>04 | 2061<br>58 | 2122<br>94 | 2215<br>13 | 2252<br>94 | 2436<br>08 | 2598<br>24 |

|                |            |            |            |            |            |            |            |            |            |            |            |
|----------------|------------|------------|------------|------------|------------|------------|------------|------------|------------|------------|------------|
| <b>Female</b>  | 1600<br>15 | 1672<br>72 | 1693<br>63 | 1724<br>43 | 1782<br>14 | 1869<br>84 | 1947<br>33 | 2023<br>64 | 2029<br>18 | 2203<br>44 | 2307<br>04 |
| <b>Unknown</b> | 1343       | 29         | 31         | 15         | 11         | 7          | 4          | 7          | 8          | 24         | 12         |

### Diseases of the musculoskeletal system

|                |            |            |            |            |            |            |            |            |            |            |            |
|----------------|------------|------------|------------|------------|------------|------------|------------|------------|------------|------------|------------|
| <b>Male</b>    | 2259<br>99 | 2305<br>17 | 2314<br>95 | 2403<br>37 | 2553<br>92 | 2675<br>03 | 2782<br>79 | 3023<br>16 | 3114<br>50 | 3428<br>17 | 3756<br>41 |
| <b>Female</b>  | 2902<br>62 | 2949<br>90 | 2986<br>99 | 3071<br>31 | 3293<br>51 | 3482<br>22 | 3636<br>99 | 3922<br>18 | 4026<br>99 | 4411<br>38 | 4746<br>74 |
| <b>Unknown</b> | 1698       | 45         | 41         | 17         | 15         | 15         | 12         | 10         | 15         | 26         | 23         |

### Congenital anomalies

|                |      |      |      |      |      |      |      |      |      |      |      |
|----------------|------|------|------|------|------|------|------|------|------|------|------|
| <b>Male</b>    | 2723 | 2760 | 2998 | 3136 | 2999 | 2982 | 3125 | 3084 | 3229 | 3400 | 3637 |
| <b>Female</b>  | 2075 | 2095 | 2156 | 2245 | 2167 | 2228 | 2228 | 2340 | 2386 | 2638 | 2721 |
| <b>Unknown</b> | 12   | 1    | 0    | 0    | 0    | 0    | 0    | 0    | 0    | 0    | 0    |

### Conditions originating in the perinatal period

|                |           |           |           |           |           |           |           |           |           |           |           |
|----------------|-----------|-----------|-----------|-----------|-----------|-----------|-----------|-----------|-----------|-----------|-----------|
| <b>Male</b>    | 1033<br>8 | 1232<br>5 | 1330<br>3 | 1430<br>8 | 1441<br>9 | 1519<br>8 | 1588<br>0 | 1625<br>9 | 1633<br>3 | 1698<br>4 | 1653<br>3 |
| <b>Female</b>  | 9158      | 1109<br>5 | 1181<br>2 | 1219<br>7 | 1251<br>9 | 1339<br>8 | 1376<br>3 | 1432<br>6 | 1436<br>6 | 1478<br>7 | 1506<br>0 |
| <b>Unknown</b> | 168       | 1         | 6         | 0         | 4         | 2         | 0         | 5         | 5         | 2         | 7         |

### Injury and poisoning

|                |             |             |             |             |             |             |             |             |             |             |             |
|----------------|-------------|-------------|-------------|-------------|-------------|-------------|-------------|-------------|-------------|-------------|-------------|
| <b>Male</b>    | 1254<br>465 | 1268<br>834 | 1284<br>762 | 1255<br>261 | 1283<br>900 | 1287<br>466 | 1303<br>012 | 1341<br>961 | 1337<br>691 | 1392<br>344 | 1447<br>368 |
| <b>Female</b>  | 1013<br>705 | 1025<br>579 | 1037<br>210 | 1033<br>479 | 1085<br>448 | 1102<br>699 | 1122<br>425 | 1164<br>799 | 1169<br>646 | 1227<br>753 | 1273<br>280 |
| <b>Unknown</b> | 8807        | 348         | 332         | 170         | 106         | 90          | 99          | 100         | 116         | 144         | 135         |

### Ill-defined conditions

|                |            |            |            |            |            |            |            |            |            |            |             |
|----------------|------------|------------|------------|------------|------------|------------|------------|------------|------------|------------|-------------|
| <b>Male</b>    | 5190<br>46 | 5388<br>31 | 5717<br>28 | 5907<br>95 | 6515<br>44 | 6406<br>27 | 6677<br>30 | 6954<br>00 | 7136<br>90 | 7394<br>06 | 7762<br>13  |
| <b>Female</b>  | 6492<br>40 | 6782<br>10 | 7198<br>42 | 7474<br>50 | 8260<br>85 | 8191<br>58 | 8550<br>36 | 8998<br>64 | 9230<br>47 | 9589<br>65 | 1007<br>572 |
| <b>Unknown</b> | 5989       | 132        | 116        | 49         | 43         | 34         | 27         | 34         | 54         | 59         | 73          |

### Unclassified

|             |      |      |      |      |      |      |      |      |      |      |      |
|-------------|------|------|------|------|------|------|------|------|------|------|------|
| <b>Male</b> | 1238 | 6321 | 5618 | 5748 | 4800 | 4480 | 4672 | 5029 | 5312 | 6137 | 7330 |
|-------------|------|------|------|------|------|------|------|------|------|------|------|

|                |            |           |           |           |           |           |           |           |           |           |           |
|----------------|------------|-----------|-----------|-----------|-----------|-----------|-----------|-----------|-----------|-----------|-----------|
|                | 15         | 5         | 5         | 3         | 7         | 5         | 9         | 8         | 6         | 1         | 4         |
| <b>Female</b>  | 1426<br>27 | 7279<br>8 | 6558<br>5 | 6585<br>2 | 5495<br>2 | 5041<br>8 | 5322<br>7 | 5646<br>7 | 5815<br>4 | 6631<br>9 | 7761<br>4 |
| <b>Unknown</b> | 676        | 38        | 19        | 9         | 16        | 9         | 11        | 7         | 10        | 12        | 10        |

**Response to Reviewers Table 2. California emergency department visits by diagnosis and age, 2005-2015**

|                                          | 2005      | 2006      | 2007      | 2008      | 2009      | 2010      | 2011      | 2012       | 2013       | 2014       | 2015       |
|------------------------------------------|-----------|-----------|-----------|-----------|-----------|-----------|-----------|------------|------------|------------|------------|
| <b>Infectious and parasitic diseases</b> |           |           |           |           |           |           |           |            |            |            |            |
| <b>&lt;5</b>                             | 6804<br>9 | 6548<br>2 | 6191<br>9 | 6837<br>1 | 8073<br>0 | 6297<br>6 | 6067<br>7 | 6955<br>3  | 6008<br>8  | 7925<br>7  | 7561<br>1  |
| <b>5-19</b>                              | 4152<br>0 | 3675<br>5 | 3566<br>2 | 3813<br>7 | 6586<br>8 | 3681<br>6 | 4002<br>4 | 3911<br>0  | 4435<br>8  | 4844<br>4  | 5518<br>5  |
| <b>20-44</b>                             | 5724<br>2 | 5209<br>6 | 5217<br>1 | 5633<br>3 | 7348<br>2 | 5695<br>3 | 6387<br>1 | 6854<br>6  | 7615<br>4  | 8812<br>4  | 9946<br>8  |
| <b>45-64</b>                             | 3690<br>7 | 3729<br>6 | 4076<br>0 | 4729<br>7 | 5500<br>0 | 5554<br>0 | 6323<br>5 | 6903<br>5  | 7782<br>6  | 8958<br>3  | 9901<br>5  |
| <b>65+</b>                               | 4647<br>2 | 5109<br>4 | 5528<br>7 | 6478<br>5 | 7177<br>6 | 8257<br>1 | 9313<br>5 | 1007<br>31 | 1141<br>22 | 1245<br>94 | 1416<br>46 |
| <b>Neoplasms</b>                         |           |           |           |           |           |           |           |            |            |            |            |
| <b>&lt;5</b>                             | 770       | 712       | 783       | 788       | 736       | 711       | 790       | 798        | 824        | 850        | 871        |
| <b>5-19</b>                              | 1449      | 1349      | 1464      | 1495      | 1504      | 1417      | 1517      | 1526       | 1614       | 1707       | 1839       |
| <b>20-44</b>                             | 9449      | 9698      | 9779      | 9943      | 1029<br>6 | 1045<br>6 | 1085<br>0 | 1115<br>3  | 1141<br>2  | 1209<br>5  | 1268<br>4  |
| <b>45-64</b>                             | 2153<br>4 | 2195<br>4 | 2218<br>7 | 2277<br>7 | 2356<br>3 | 2451<br>5 | 2517<br>4 | 2532<br>4  | 2583<br>5  | 2659<br>0  | 2670<br>2  |
| <b>65+</b>                               | 2809<br>5 | 2781<br>1 | 2808<br>3 | 2861<br>6 | 2787<br>5 | 2819<br>2 | 2855<br>1 | 2882<br>7  | 2884<br>3  | 2921<br>5  | 3090<br>8  |
| <b>Endocrine disorders</b>               |           |           |           |           |           |           |           |            |            |            |            |
| <b>&lt;5</b>                             | 1292<br>6 | 1217<br>8 | 1166<br>8 | 1027<br>2 | 1020<br>0 | 8124      | 8722      | 8246       | 8488       | 7413       | 8337       |
| <b>5-19</b>                              | 1222<br>7 | 1267<br>3 | 1316<br>2 | 1306<br>4 | 1429<br>8 | 1308<br>9 | 1411<br>6 | 1423<br>4  | 1526<br>7  | 1531<br>7  | 1613<br>2  |



|                                                       |            |            |            |            |            |            |            |            |            |            |            |
|-------------------------------------------------------|------------|------------|------------|------------|------------|------------|------------|------------|------------|------------|------------|
| <b>20-44</b>                                          | 4959<br>7  | 5218<br>2  | 5550<br>6  | 5621<br>6  | 5882<br>5  | 5969<br>5  | 6198<br>2  | 6461<br>8  | 6697<br>5  | 6952<br>5  | 7190<br>3  |
| <b>45-64</b>                                          | 6283<br>2  | 6774<br>7  | 7269<br>6  | 7581<br>7  | 8102<br>4  | 8318<br>1  | 8695<br>2  | 9049<br>6  | 9229<br>3  | 9697<br>5  | 1010<br>55 |
| <b>65+</b>                                            | 7091<br>7  | 7529<br>9  | 7735<br>1  | 7805<br>4  | 7834<br>1  | 7948<br>3  | 8279<br>2  | 8634<br>4  | 8672<br>0  | 8747<br>3  | 9241<br>9  |
| <b>Diseases of the blood and blood-forming organs</b> |            |            |            |            |            |            |            |            |            |            |            |
| <b>&lt;5</b>                                          | 1949       | 1855       | 2014       | 2087       | 2142       | 2139       | 2077       | 2118       | 2142       | 2426       | 2455       |
| <b>5-19</b>                                           | 3367       | 3207       | 3380       | 3742       | 3970       | 3832       | 4363       | 4246       | 4255       | 4556       | 5097       |
| <b>20-44</b>                                          | 1166<br>4  | 1247<br>5  | 1341<br>1  | 1445<br>3  | 1569<br>4  | 1556<br>8  | 1706<br>8  | 1799<br>8  | 1852<br>4  | 1990<br>9  | 2049<br>9  |
| <b>45-64</b>                                          | 9734       | 1088<br>1  | 1194<br>8  | 1397<br>8  | 1491<br>8  | 1550<br>6  | 1687<br>7  | 1817<br>1  | 1804<br>9  | 1910<br>4  | 1975<br>3  |
| <b>65+</b>                                            | 1355<br>5  | 1465<br>9  | 1538<br>0  | 1773<br>2  | 1894<br>5  | 1965<br>6  | 2129<br>9  | 2312<br>1  | 2322<br>6  | 2375<br>4  | 2414<br>1  |
| <b>Mental illness</b>                                 |            |            |            |            |            |            |            |            |            |            |            |
| <b>&lt;5</b>                                          | 1027       | 1026       | 999        | 981        | 1048       | 1030       | 1001       | 1050       | 1018       | 1024       | 1387       |
| <b>5-19</b>                                           | 4641<br>9  | 4568<br>6  | 4903<br>5  | 5303<br>7  | 5761<br>0  | 6096<br>3  | 6140<br>9  | 6637<br>2  | 6783<br>5  | 7399<br>2  | 7712<br>8  |
| <b>20-44</b>                                          | 2070<br>31 | 1989<br>97 | 2051<br>75 | 2165<br>02 | 2261<br>92 | 2416<br>50 | 2535<br>08 | 2810<br>59 | 2942<br>41 | 3229<br>62 | 3433<br>50 |
| <b>45-64</b>                                          | 1183<br>10 | 1242<br>64 | 1331<br>82 | 1451<br>88 | 1536<br>08 | 1633<br>93 | 1726<br>83 | 1874<br>44 | 1913<br>74 | 2048<br>66 | 2143<br>62 |
| <b>65+</b>                                            | 3566<br>4  | 3620<br>7  | 3735<br>4  | 3968<br>9  | 4084<br>5  | 4354<br>7  | 4582<br>6  | 5160<br>0  | 5370<br>5  | 5930<br>8  | 6158<br>9  |
| <b>Diseases of the nervous system</b>                 |            |            |            |            |            |            |            |            |            |            |            |
| <b>&lt;5</b>                                          | 1514<br>45 | 1445<br>10 | 1521<br>03 | 1538<br>40 | 1650<br>49 | 1563<br>05 | 1488<br>27 | 1411<br>58 | 1439<br>33 | 1339<br>64 | 1480<br>74 |
| <b>5-19</b>                                           | 1221<br>12 | 1254<br>06 | 1265<br>82 | 1331<br>72 | 1526<br>56 | 1514<br>49 | 1532<br>26 | 1523<br>08 | 1635<br>38 | 1669<br>01 | 1900<br>57 |
| <b>20-44</b>                                          | 2961<br>42 | 2994<br>87 | 3177<br>18 | 3351<br>47 | 3606<br>84 | 3688<br>19 | 3745<br>51 | 3895<br>31 | 3890<br>01 | 4171<br>46 | 4318<br>36 |
| <b>45-64</b>                                          | 1758<br>25 | 1870<br>37 | 2071<br>84 | 2247<br>29 | 2447<br>89 | 2549<br>98 | 2652<br>41 | 2785<br>07 | 2810<br>84 | 3016<br>15 | 3086<br>34 |
| <b>65+</b>                                            | 9469<br>5  | 9901<br>6  | 1048<br>99 | 1118<br>89 | 1185<br>65 | 1241<br>69 | 1317<br>41 | 1422<br>69 | 1468<br>17 | 1581<br>49 | 1653<br>50 |

| <b>Diseases of the circulatory system</b>   |            |            |            |            |            |            |            |            |            |            |            |
|---------------------------------------------|------------|------------|------------|------------|------------|------------|------------|------------|------------|------------|------------|
| <5                                          | 2092       | 2022       | 2164       | 2084       | 2032       | 2084       | 1947       | 2032       | 1987       | 2126       | 2569       |
| 5-19                                        | 2086<br>1  | 2154<br>7  | 2252<br>4  | 2439<br>3  | 2680<br>0  | 2810<br>5  | 2928<br>9  | 3114<br>9  | 3139<br>5  | 3423<br>7  | 3682<br>2  |
| 20-44                                       | 1761<br>53 | 1742<br>90 | 1794<br>34 | 1845<br>36 | 1947<br>36 | 2007<br>01 | 2059<br>27 | 2203<br>33 | 2165<br>68 | 2312<br>62 | 2465<br>77 |
| 45-64                                       | 2869<br>62 | 2947<br>72 | 3090<br>77 | 3220<br>78 | 3370<br>76 | 3475<br>46 | 3616<br>31 | 3814<br>89 | 3730<br>16 | 3878<br>58 | 4081<br>72 |
| 65+                                         | 3679<br>45 | 3654<br>19 | 3688<br>94 | 3764<br>25 | 3810<br>16 | 3903<br>39 | 4080<br>70 | 4247<br>18 | 4255<br>47 | 4306<br>82 | 4579<br>49 |
| <b>Diseases of the respiratory system</b>   |            |            |            |            |            |            |            |            |            |            |            |
| <5                                          | 3383<br>81 | 3097<br>06 | 3414<br>80 | 3445<br>61 | 4226<br>44 | 3996<br>60 | 3917<br>34 | 3665<br>61 | 3885<br>80 | 3713<br>15 | 4175<br>17 |
| 5-19                                        | 2372<br>02 | 2136<br>96 | 2146<br>76 | 2254<br>58 | 3566<br>72 | 2672<br>43 | 2811<br>13 | 2631<br>54 | 2971<br>65 | 3072<br>36 | 3538<br>54 |
| 20-44                                       | 3280<br>73 | 2968<br>18 | 2987<br>17 | 3283<br>73 | 4053<br>41 | 3445<br>74 | 3637<br>85 | 3533<br>82 | 3760<br>91 | 4031<br>78 | 4486<br>48 |
| 45-64                                       | 2165<br>52 | 2049<br>99 | 2117<br>26 | 2384<br>14 | 2658<br>03 | 2499<br>87 | 2603<br>61 | 2593<br>34 | 2780<br>76 | 2888<br>36 | 3151<br>40 |
| 65+                                         | 2420<br>19 | 2250<br>14 | 2225<br>71 | 2417<br>73 | 2383<br>47 | 2379<br>97 | 2454<br>58 | 2465<br>18 | 2655<br>03 | 2524<br>39 | 2848<br>20 |
| <b>Diseases of the digestive system</b>     |            |            |            |            |            |            |            |            |            |            |            |
| <5                                          | 9352<br>0  | 1051<br>28 | 1014<br>09 | 8935<br>2  | 8969<br>9  | 7600<br>5  | 8148<br>2  | 7836<br>8  | 8161<br>0  | 7520<br>7  | 8539<br>7  |
| 5-19                                        | 8415<br>5  | 8860<br>5  | 9132<br>0  | 9219<br>5  | 1010<br>20 | 9538<br>5  | 1015<br>40 | 1046<br>52 | 1120<br>95 | 1136<br>45 | 1229<br>93 |
| 20-44                                       | 2510<br>76 | 2712<br>32 | 2804<br>43 | 2822<br>44 | 2999<br>35 | 3067<br>57 | 3225<br>69 | 3399<br>54 | 3479<br>49 | 3723<br>59 | 3927<br>95 |
| 45-64                                       | 1696<br>45 | 1885<br>27 | 1946<br>97 | 2024<br>22 | 2152<br>39 | 2241<br>28 | 2365<br>70 | 2506<br>88 | 2561<br>20 | 2753<br>24 | 2895<br>88 |
| 65+                                         | 1491<br>51 | 1654<br>72 | 1653<br>41 | 1670<br>37 | 1732<br>43 | 1795<br>84 | 1885<br>51 | 2020<br>24 | 2046<br>52 | 2122<br>22 | 2246<br>21 |
| <b>Diseases of the genitourinary system</b> |            |            |            |            |            |            |            |            |            |            |            |
| <5                                          | 2440<br>9  | 2458<br>3  | 2667<br>4  | 2919<br>8  | 3141<br>5  | 3212<br>7  | 3351<br>2  | 3268<br>7  | 3334<br>7  | 3385<br>3  | 3408<br>2  |
| 5-19                                        | 6500       | 6523       | 6944       | 7389       | 8061       | 8171       | 8352       | 8403       | 8682       | 9330       | 9623       |

|                                                     |            |            |            |            |            |            |            |            |            |            |            |
|-----------------------------------------------------|------------|------------|------------|------------|------------|------------|------------|------------|------------|------------|------------|
|                                                     | 0          | 5          | 4          | 1          | 2          | 3          | 3          | 4          | 5          | 1          | 5          |
| <b>20-44</b>                                        | 2405<br>86 | 2465<br>53 | 2512<br>10 | 2584<br>69 | 2746<br>71 | 2823<br>95 | 2957<br>73 | 3101<br>25 | 3173<br>07 | 3483<br>13 | 3660<br>04 |
| <b>45-64</b>                                        | 1150<br>10 | 1234<br>12 | 1288<br>27 | 1372<br>49 | 1451<br>74 | 1497<br>87 | 1596<br>10 | 1706<br>07 | 1763<br>39 | 1936<br>92 | 2065<br>02 |
| <b>65+</b>                                          | 1156<br>44 | 1229<br>82 | 1274<br>08 | 1332<br>14 | 1378<br>85 | 1424<br>30 | 1522<br>64 | 1645<br>47 | 1712<br>26 | 1835<br>53 | 1982<br>11 |
| <b>Complications of pregnancy</b>                   |            |            |            |            |            |            |            |            |            |            |            |
| <b>&lt;5</b>                                        | 23         | 16         | 32         | 22         | 25         | 7          | 6          | 6          | 4          | 9          | 7          |
| <b>5-19</b>                                         | 3738<br>3  | 4182<br>0  | 4488<br>7  | 4572<br>6  | 4655<br>6  | 4461<br>9  | 4108<br>2  | 3993<br>3  | 3755<br>6  | 3657<br>4  | 3423<br>1  |
| <b>20-44</b>                                        | 2044<br>14 | 2243<br>70 | 2428<br>10 | 2439<br>09 | 2549<br>98 | 2660<br>68 | 2696<br>20 | 2815<br>00 | 2940<br>50 | 3122<br>10 | 3229<br>23 |
| <b>45-64</b>                                        | 794        | 887        | 1046       | 953        | 984        | 952        | 1097       | 1126       | 1169       | 1355       | 1405       |
| <b>65+</b>                                          | 15         | 22         | 17         | 17         | 6          | 1          | 4          | 1          | 8          | 3          | 7          |
| <b>Diseases of the skin and subcutaneous tissue</b> |            |            |            |            |            |            |            |            |            |            |            |
| <b>&lt;5</b>                                        | 2528<br>7  | 2872<br>5  | 3077<br>6  | 3351<br>9  | 3546<br>9  | 3733<br>8  | 3823<br>5  | 4020<br>0  | 3690<br>9  | 4100<br>1  | 3923<br>7  |
| <b>5-19</b>                                         | 4950<br>0  | 5166<br>5  | 5351<br>4  | 5457<br>7  | 5624<br>5  | 5907<br>1  | 6032<br>4  | 6153<br>7  | 6121<br>2  | 6802<br>4  | 7002<br>8  |
| <b>20-44</b>                                        | 1563<br>00 | 1577<br>53 | 1525<br>41 | 1478<br>32 | 1497<br>32 | 1553<br>39 | 1590<br>56 | 1640<br>45 | 1666<br>10 | 1789<br>16 | 1909<br>41 |
| <b>45-64</b>                                        | 8417<br>8  | 8861<br>2  | 8960<br>4  | 9022<br>4  | 9268<br>8  | 9829<br>3  | 1029<br>76 | 1089<br>20 | 1127<br>88 | 1215<br>46 | 1313<br>59 |
| <b>65+</b>                                          | 3499<br>0  | 3743<br>8  | 3843<br>6  | 3970<br>9  | 4149<br>5  | 4310<br>8  | 4644<br>0  | 4918<br>2  | 5070<br>1  | 5448<br>9  | 5897<br>5  |
| <b>Diseases of the musculoskeletal system</b>       |            |            |            |            |            |            |            |            |            |            |            |
| <b>&lt;5</b>                                        | 8056       | 8388       | 8929       | 9385       | 9919       | 1016<br>2  | 1074<br>4  | 1122<br>7  | 1106<br>0  | 1170<br>9  | 1244<br>6  |
| <b>5-19</b>                                         | 3896<br>1  | 3952<br>2  | 4207<br>6  | 4423<br>6  | 4769<br>6  | 4978<br>8  | 5226<br>3  | 5709<br>4  | 5853<br>6  | 6483<br>9  | 7174<br>7  |
| <b>20-44</b>                                        | 2113<br>48 | 2084<br>49 | 2065<br>71 | 2098<br>21 | 2249<br>84 | 2338<br>68 | 2401<br>91 | 2585<br>84 | 2634<br>17 | 2897<br>05 | 3119<br>40 |
| <b>45-64</b>                                        | 1727<br>97 | 1789<br>30 | 1805<br>12 | 1889<br>62 | 2021<br>70 | 2164<br>90 | 2259<br>39 | 2436<br>85 | 2526<br>34 | 2773<br>67 | 2986<br>51 |

|                                                       |            |            |            |            |            |            |            |            |            |            |            |
|-------------------------------------------------------|------------|------------|------------|------------|------------|------------|------------|------------|------------|------------|------------|
| 65+                                                   | 8679<br>7  | 9026<br>3  | 9214<br>7  | 9508<br>1  | 9998<br>9  | 1054<br>32 | 1128<br>53 | 1239<br>54 | 1285<br>17 | 1403<br>61 | 1555<br>54 |
| <b>Congenital anomalies</b>                           |            |            |            |            |            |            |            |            |            |            |            |
| <5                                                    | 1999       | 2059       | 2214       | 2317       | 2042       | 2024       | 2068       | 2091       | 2044       | 2112       | 2249       |
| 5-19                                                  | 693        | 681        | 673        | 710        | 687        | 720        | 716        | 713        | 773        | 911        | 988        |
| 20-44                                                 | 1013       | 1060       | 1044       | 1087       | 1165       | 1172       | 1228       | 1258       | 1288       | 1410       | 1454       |
| 45-64                                                 | 678        | 661        | 766        | 785        | 796        | 834        | 886        | 852        | 978        | 1020       | 1036       |
| 65+                                                   | 427        | 395        | 457        | 482        | 476        | 460        | 455        | 510        | 532        | 585        | 631        |
| <b>Conditions originating in the perinatal period</b> |            |            |            |            |            |            |            |            |            |            |            |
| <5                                                    | 1934<br>5  | 2323<br>1  | 2492<br>2  | 2627<br>2  | 2664<br>7  | 2820<br>8  | 2925<br>9  | 3023<br>0  | 3033<br>3  | 3145<br>1  | 3127<br>0  |
| 5-19                                                  | 66         | 46         | 42         | 50         | 103        | 184        | 177        | 189        | 198        | 168        | 137        |
| 20-44                                                 | 183        | 132        | 144        | 171        | 156        | 174        | 173        | 138        | 145        | 136        | 156        |
| 45-64                                                 | 40         | 10         | 8          | 8          | 21         | 20         | 27         | 23         | 21         | 11         | 25         |
| 65+                                                   | 30         | 2          | 5          | 4          | 15         | 12         | 7          | 10         | 7          | 7          | 12         |
| <b>Injury and poisoning</b>                           |            |            |            |            |            |            |            |            |            |            |            |
| <5                                                    | 2067<br>10 | 2110<br>35 | 2188<br>73 | 2227<br>33 | 2418<br>76 | 2384<br>75 | 2368<br>29 | 2410<br>21 | 2328<br>09 | 2367<br>05 | 2304<br>67 |
| 5-19                                                  | 5417<br>51 | 5394<br>09 | 5470<br>77 | 5328<br>94 | 5464<br>85 | 5442<br>76 | 5435<br>25 | 5620<br>01 | 5585<br>88 | 5766<br>34 | 5814<br>58 |
| 20-44                                                 | 8225<br>21 | 8150<br>08 | 8077<br>83 | 7755<br>53 | 7822<br>11 | 7826<br>19 | 7909<br>28 | 8142<br>98 | 8088<br>20 | 8484<br>56 | 8939<br>72 |
| 45-64                                                 | 4131<br>30 | 4272<br>25 | 4381<br>75 | 4392<br>58 | 4603<br>80 | 4720<br>66 | 4831<br>70 | 5010<br>71 | 5045<br>68 | 5331<br>20 | 5605<br>21 |
| 65+                                                   | 2928<br>65 | 3020<br>84 | 3103<br>96 | 3184<br>72 | 3385<br>02 | 3528<br>19 | 3710<br>84 | 3884<br>69 | 4026<br>68 | 4253<br>26 | 4543<br>65 |
| <b>Ill-defined conditions</b>                         |            |            |            |            |            |            |            |            |            |            |            |
| <5                                                    | 1864<br>50 | 1878<br>85 | 2126<br>11 | 2224<br>04 | 2562<br>59 | 2372<br>45 | 2386<br>70 | 2455<br>16 | 2536<br>30 | 2453<br>17 | 2600<br>37 |
| 5-19                                                  | 2034<br>15 | 2068<br>81 | 2207<br>04 | 2312<br>61 | 2822<br>04 | 2582<br>41 | 2728<br>58 | 2788<br>54 | 3025<br>66 | 3107<br>70 | 3344<br>59 |
| 20-44                                                 | 4225<br>82 | 4371<br>96 | 4541<br>07 | 4624<br>59 | 4949<br>32 | 5028<br>15 | 5240<br>35 | 5503<br>23 | 5573<br>75 | 5910<br>60 | 6140<br>48 |

|                     |            |            |            |            |            |            |            |            |            |            |            |
|---------------------|------------|------------|------------|------------|------------|------------|------------|------------|------------|------------|------------|
| <b>45-64</b>        | 2145<br>46 | 2306<br>51 | 2454<br>58 | 2564<br>34 | 2735<br>16 | 2855<br>66 | 3014<br>81 | 3212<br>51 | 3215<br>98 | 3416<br>18 | 3539<br>94 |
| <b>65+</b>          | 1472<br>82 | 1545<br>60 | 1588<br>06 | 1657<br>36 | 1707<br>61 | 1759<br>52 | 1857<br>49 | 1993<br>54 | 2016<br>22 | 2096<br>65 | 2213<br>20 |
| <b>Unclassified</b> |            |            |            |            |            |            |            |            |            |            |            |
| <b>&lt;5</b>        | 2128<br>0  | 1013<br>4  | 9030       | 8874       | 7729       | 6705       | 6697       | 7103       | 7201       | 8337       | 8908       |
| <b>5-19</b>         | 3720<br>0  | 1458<br>4  | 1214<br>3  | 1243<br>9  | 9420       | 7501       | 7441       | 7884       | 8006       | 9729       | 1237<br>2  |
| <b>20-44</b>        | 9533<br>5  | 4524<br>9  | 3844<br>9  | 3814<br>8  | 3019<br>6  | 2738<br>5  | 2914<br>6  | 3176<br>7  | 3296<br>5  | 3940<br>5  | 4864<br>2  |
| <b>45-64</b>        | 7015<br>1  | 3674<br>6  | 3349<br>4  | 3450<br>5  | 2996<br>5  | 2873<br>9  | 3028<br>9  | 3160<br>9  | 3332<br>2  | 3750<br>2  | 4351<br>7  |
| <b>65+</b>          | 4315<br>2  | 2933<br>8  | 2867<br>3  | 2937<br>8  | 2566<br>5  | 2490<br>2  | 2639<br>4  | 2840<br>9  | 2979<br>6  | 3272<br>9  | 3748<br>9  |

#### VERSION 2 – REVIEW

|                        |                                                                                                                            |
|------------------------|----------------------------------------------------------------------------------------------------------------------------|
| <b>REVIEWER</b>        | Matthias David<br>Charité Universitätsmedizin Berlin, Campus Virchow-Klinikum,<br>Department of Gynecology, Berlin/Germany |
| <b>REVIEW RETURNED</b> | 14-Mar-2018                                                                                                                |

|                         |                                                                                                                 |
|-------------------------|-----------------------------------------------------------------------------------------------------------------|
| <b>GENERAL COMMENTS</b> | All questions were answered sufficiently, the manuscript was consequently revised. I recommend the publication. |
|-------------------------|-----------------------------------------------------------------------------------------------------------------|

|                        |                                                                                              |
|------------------------|----------------------------------------------------------------------------------------------|
| <b>REVIEWER</b>        | Erika H. Newton, MD, MPH<br>Department of Emergency Medicine, Stony Brook University, U.S.A. |
| <b>REVIEW RETURNED</b> | 18-Mar-2018                                                                                  |

|                         |                                                                                                                                                                                                                                                                                                                                                                                                                                                                                                                                                                                                                                                                                                                                                                                                                                                                                                                                                                                                                                                                                                         |
|-------------------------|---------------------------------------------------------------------------------------------------------------------------------------------------------------------------------------------------------------------------------------------------------------------------------------------------------------------------------------------------------------------------------------------------------------------------------------------------------------------------------------------------------------------------------------------------------------------------------------------------------------------------------------------------------------------------------------------------------------------------------------------------------------------------------------------------------------------------------------------------------------------------------------------------------------------------------------------------------------------------------------------------------------------------------------------------------------------------------------------------------|
| <b>GENERAL COMMENTS</b> | <p>The authors satisfactorily address the reviewers' comments for the most part. I propose two additional minor changes:</p> <p>Abstract, lines 5-10 - "Trends and characteristics (of patients)" and "changes in the composition (of visits)...over time" would seem to refer to the same analysis and to be, therefore, redundant. Consider "To examine current trends in the characteristics of patients visiting California emergency departments (EDs) [in order] to better direct the allocation of acute care resources." (Though visits, not patients, are the true unit of analysis, it's still patient characteristics being described. The revised manuscript makes clear that the trends in fact apply to visits, not individuals.)</p> <p>Query #11, by Reviewer #2, was not whether observation visits were captured, but how they were categorized. If hospital observation was categorized as hospital admission, this should be stated. Likewise, use of the term "treat-and-release" (page 8, line 31) as a synonym for ED discharge is somewhat misleading if a portion of these</p> |
|-------------------------|---------------------------------------------------------------------------------------------------------------------------------------------------------------------------------------------------------------------------------------------------------------------------------------------------------------------------------------------------------------------------------------------------------------------------------------------------------------------------------------------------------------------------------------------------------------------------------------------------------------------------------------------------------------------------------------------------------------------------------------------------------------------------------------------------------------------------------------------------------------------------------------------------------------------------------------------------------------------------------------------------------------------------------------------------------------------------------------------------------|

|                         |                                                                                                                                                                                                                                                                                                                                                                                                                                                                                                                                                                                                                                                                                                                                                                                                                                                                                                                                                                                                                                                                                                                                                                                                                                                                                                                                                                                                                                                    |
|-------------------------|----------------------------------------------------------------------------------------------------------------------------------------------------------------------------------------------------------------------------------------------------------------------------------------------------------------------------------------------------------------------------------------------------------------------------------------------------------------------------------------------------------------------------------------------------------------------------------------------------------------------------------------------------------------------------------------------------------------------------------------------------------------------------------------------------------------------------------------------------------------------------------------------------------------------------------------------------------------------------------------------------------------------------------------------------------------------------------------------------------------------------------------------------------------------------------------------------------------------------------------------------------------------------------------------------------------------------------------------------------------------------------------------------------------------------------------------------|
|                         | patients were placed on "ED observation." If ED observation was categorized as ED discharge, this should be stated.                                                                                                                                                                                                                                                                                                                                                                                                                                                                                                                                                                                                                                                                                                                                                                                                                                                                                                                                                                                                                                                                                                                                                                                                                                                                                                                                |
| <b>REVIEWER</b>         | Lauren Birmingham<br>Kent State University, Summa Health System                                                                                                                                                                                                                                                                                                                                                                                                                                                                                                                                                                                                                                                                                                                                                                                                                                                                                                                                                                                                                                                                                                                                                                                                                                                                                                                                                                                    |
| <b>REVIEW RETURNED</b>  | 26-Mar-2018                                                                                                                                                                                                                                                                                                                                                                                                                                                                                                                                                                                                                                                                                                                                                                                                                                                                                                                                                                                                                                                                                                                                                                                                                                                                                                                                                                                                                                        |
| <b>GENERAL COMMENTS</b> | <p>This revision improves upon the previous version of this manuscript.</p> <p>The discussion and conclusions have been tempered to not over-generalize to conclusions about unmet healthcare need, which I believe is appropriate.</p> <p>Clarification about observation stays is noted. This is helpful clarification to make, since these are a relatively new phenomenon and are sometimes classified differently in the literature. The conclusion in the Abstract is much improved.</p> <p>The review checklist asks if statistics are described in detail in the manuscript. The data, stratification procedure, and Clinical Classification Software (CCS) use is well-described. The particular statistical test(s) used in this analysis are not described. Including this (as obvious as the method may be to some) would improve the Statistical Analysis section.</p> <p>In the Methods section, the manuscript states, "We clustered 2015 diagnoses into multi-level CCS categories...". Is this all diagnoses or just the primary diagnosis? This would be worth clarifying as this can have a significant impact on the results, and is necessary to understand from a replication standpoint. (Line 23 page 8)</p> <p>Overall this manuscript is improved from its previous form and I recommend the manuscript be accepted with these minor clarifications.</p> <p>Thank you for the opportunity to review this manuscript.</p> |

## VERSION 2 – AUTHOR RESPONSE

### **Reviewer #1:**

1. All questions were answered sufficiently, the manuscript was consequently revised. I recommend the publication.

Thank you. We appreciate your help in providing comments that helped us improve our manuscript.

### **Reviewer #2:**

2. This revision improves upon the previous version of this manuscript. The discussion and conclusions have been tempered to not over-generalize to conclusions about unmet healthcare need, which I believe is appropriate. Clarification about observation stays is noted. This is helpful clarification to make, since these are a relatively new phenomenon and are

sometimes classified differently in the literature. The conclusion in the Abstract is much improved.

Thank you for your helpful feedback and suggestions that helped us clarify important points and improve our manuscript.

3. The review checklist asks if statistics are described in detail in the manuscript. The data, stratification procedure, and Clinical Classification Software (CCS) use is well-described. The particular statistical test(s) used in this analysis are not described. Including this (as obvious as the method may be to some) would improve the Statistical Analysis section.

We have now added information (italicized/underlined text below) on the statistical test we used in the Methods section under 'Statistical Analysis' on page 6. The revised sentence now reads:

"We analyzed ED visits and visit rates using a linear regression model to test for significant linear temporal trends in California from 2005 to 2015 by age group (<5 years, 5-19 years, 20-44 years, 45-64 years, and 65 years and over); sex (male, female, unknown); race/ethnicity group (non-Hispanic White, non-Hispanic Black, Hispanic, Other); payer/insurance status (private, Medicare, Medicaid, uninsured/self-pay, other, unknown); and metropolitan statistical area (rural or urban)."

4. In the Methods section, the manuscript states, "We clustered 2015 diagnoses into multi-level CCS categories..." Is this all diagnoses or just the primary diagnosis? This would be worth clarifying as this can have a significant impact on the results, and is necessary to understand from a replication standpoint. (Line 23 page 8)

We analyzed primary diagnoses. We have made this clarification in the Methods section under 'Statistical Analysis' on page 7, and the sentence now reads:

"We clustered 2015 primary diagnoses into multi-level CCS categories using single-level CCS categorizations provided in the data, which accounted for the transition from ICD-9 to ICD-10 coding in October 2015."

5. Overall this manuscript is improved from its previous form and I recommend the manuscript be accepted with these minor clarifications. Thank you for the opportunity to review this manuscript.

Thank you for the time and attention you have given to our manuscript.

**Reviewer #3:**

The authors satisfactorily address the reviewers' comments for the most part. I propose two additional minor changes:

6. Abstract, lines 5-10 - "Trends and characteristics (of patients)" and "changes in the composition (of visits)...over time" would seem to refer to the same analysis and to be, therefore, redundant. Consider "To examine current trends in the characteristics of patients visiting California emergency departments (EDs) [in order] to better direct the allocation of acute care resources." (Though visits, not patients, are the true unit of analysis, it's still patient characteristics being described. The revised manuscript makes clear that the trends in fact apply to visits, not individuals.)

Thank you for this suggestion. We have revised the Objective sentence of the Abstract on page 2, and it now reads:

"To examine current trends in the characteristics of patients visiting California emergency departments (EDs) in order to better direct the allocation of acute care resources."

7. Query #11, by Reviewer #2, was not whether observation visits were captured, but how they were categorized. If hospital observation was categorized as hospital admission, this should be stated. Likewise, use of the term "treat-and-release" (page 8, line 31) as a synonym for ED discharge is somewhat misleading if a portion of these patients were placed on "ED observation." If ED observation was categorized as ED discharge, this should be stated.

Since we captured observation stays in both the ED and inpatient settings, they were categorized as either a hospital admission or ED discharge (OSHPD does not distinguish between the two). We have made this clarification and added the italicized/underlined phrase below to the sentence on observation stays in the Methods section under "Inclusion Criteria and Variable Definition" on page 6:

"All observation stays that initially came through the ED – whether they were admitted to the inpatient setting or discharged directly from the ED – were captured in our dataset and categorized as either a hospital admission or ED discharge."

We have now deleted the term "treat-and-release" in both the Methods (page 6) and Results (page 8) sections to avoid any confusion.
