# Supplementary material for: Trends in the utilisation of emergency departments in California, 2005–2015: a retrospective analysis
Source: PubMed Central journal article supplement — BMJ Open. 2018 Jul 23;8(7):e021392. doi: 10.1136/bmjopen-2017-021392 (PMC6059325; doi:10.1136/bmjopen-2017-021392), 2018-07-23
Supplement: bmjopen-2017-021392supp001.pdf [file bmjopen-2017-021392supp001.pdf]

**SUPPLEMENTARY MATERIALS**

**Supplementary Table 1. Descriptive characteristics of California emergency department visits, 2005-2015**

| <b>Characteristic</b>  | <b>2005</b> | <b>2006</b> | <b>2007</b> | <b>2008</b> | <b>2009</b> | <b>2010</b> | <b>2011</b> | <b>2012</b> | <b>2013</b> | <b>2014</b> | <b>2015</b> | <b>% Change</b> | <b>P-value</b> |
|------------------------|-------------|-------------|-------------|-------------|-------------|-------------|-------------|-------------|-------------|-------------|-------------|-----------------|----------------|
| <b>Total ED visits</b> | 10187048    | 10172173    | 10476830    | 10777904    | 11654758    | 11564940    | 11960916    | 12407787    | 12717983    | 13379768    | 14228961    | 39.7%           | <0.001         |
| <b>Age group</b>       |             |             |             |             |             |             |             |             |             |             |             |                 |                |
| <5                     | 1163718     | 1138675     | 1208600     | 1227060     | 1385661     | 1301325     | 1293277     | 1279965     | 1296007     | 1284076     | 1360921     | 16.9%           | 0.002          |
| 5-19                   | 1543281     | 1508767     | 1548365     | 1580477     | 1850406     | 1704412     | 1748506     | 1768990     | 1851782     | 1926985     | 2060762     | 33.5%           | <0.001         |
| 20-44                  | 3540709     | 3503045     | 3567013     | 3621196     | 3858230     | 3857008     | 3984261     | 4158612     | 4238892     | 4546171     | 4817840     | 36.1%           | <0.001         |
| 45-64                  | 2169625     | 2224611     | 2321347     | 2441078     | 2596714     | 2671541     | 2794199     | 2939632     | 2997090     | 3197982     | 3379431     | 55.8%           | <0.001         |
| 65+                    | 1769715     | 1797075     | 1831505     | 1908093     | 1963747     | 2030654     | 2140673     | 2260588     | 2334212     | 2424554     | 2610007     | 47.5%           | <0.001         |
| <b>Sex</b>             |             |             |             |             |             |             |             |             |             |             |             |                 |                |
| Male                   | 4749677     | 4744206     | 4870474     | 4982441     | 5361116     | 5305158     | 5478365     | 5674693     | 5821163     | 6111803     | 6533740     | 37.6%           | <0.001         |
| Female                 | 5400871     | 5426867     | 5605380     | 5794994     | 6293259     | 6259489     | 6482298     | 6732782     | 6896402     | 7267461     | 7694688     | 42.5%           | <0.001         |
| Unknown                | 36498       | 1092        | 973         | 463         | 383         | 290         | 251         | 310         | 418         | 504         | 518         | -98.6%          | 0.243          |
| <b>Race/Ethnicity</b>  |             |             |             |             |             |             |             |             |             |             |             |                 |                |
| NH White               | 4629083     | 4678727     | 4803242     | 4882971     | 5136236     | 5101499     | 5215676     | 5364074     | 5343623     | 5473429     | 5670856     | 22.5%           | <0.001         |
| NH Black               | 995223      | 1039629     | 1103005     | 1163257     | 1282527     | 1298439     | 1349509     | 1413949     | 1427593     | 1497705     | 1566555     | 57.4%           | <0.001         |
| Hispanic               | 3003407     | 3087315     | 3289467     | 3489075     | 3983295     | 3913063     | 4120055     | 4314009     | 4580423     | 4911172     | 5358365     | 78.4%           | <0.001         |
| Other                  | 853928      | 897019      | 952814      | 971168      | 1060702     | 1086787     | 1123314     | 1160613     | 1200721     | 1303590     | 1447204     | 69.5%           | <0.001         |
| <b>Payer</b>           |             |             |             |             |             |             |             |             |             |             |             |                 |                |
| Private                | 3568181     | 3524078     | 3607646     | 3671131     | 3831600     | 3596830     | 3682133     | 3749377     | 3635780     | 3781082     | 3788784     | 6.2%            | 0.002          |
| Medicaid               | 2330998     | 2328948     | 2475271     | 2652643     | 3114505     | 3117815     | 3229952     | 3362952     | 3629446     | 4858001     | 5849956     | 151.0%          | 0.001          |
| Medicare               | 1901449     | 1961387     | 2021499     | 2136053     | 2213792     | 2329984     | 2470110     | 2642609     | 2728514     | 2839188     | 3002826     | 57.9%           | <0.001         |
| Uninsured/self-pay     | 1569042     | 1621182     | 1677550     | 1697604     | 1823444     | 1838886     | 1882198     | 1892743     | 1909953     | 1386455     | 1093733     | -30.3%          | 0.527          |
| Other                  | 813974      | 734799      | 691266      | 617190      | 669627      | 679615      | 694036      | 757560      | 810812      | 511859      | 488805      | -39.9%          | 0.112          |
| Unknown                | 3404        | 1779        | 3598        | 3283        | 1790        | 1810        | 2487        | 2546        | 3478        | 3183        | 4857        | 42.7%           | 0.307          |
| <b>MSA</b>             |             |             |             |             |             |             |             |             |             |             |             |                 |                |
| Urban                  | 9833448     | 9820399     | 10126757    | 10425976    | 11289497    | 11207639    | 11601631    | 12046167    | 12345194    | 12994568    | 13814543    | 40.5%           | <0.001         |
| Rural                  | 353600      | 351774      | 350073      | 351928      | 365261      | 357301      | 359285      | 361620      | 372789      | 385200      | 414418      | 17.2%           | 0.010          |

ED, emergency department; NH, non-Hispanic; MSA, Metropolitan Statistical Area.

**Supplementary Table 2. California emergency department visits, 2005-2015 – Medicaid insured**

|                         | 2005    | 2006    | 2007    | 2008    | 2009    | 2010    | 2011    | 2012    | 2013    | 2014    | 2015    | % Change |
|-------------------------|---------|---------|---------|---------|---------|---------|---------|---------|---------|---------|---------|----------|
| <b>Age group, years</b> |         |         |         |         |         |         |         |         |         |         |         |          |
| <5                      | 542614  | 544552  | 593483  | 628214  | 747939  | 717052  | 718256  | 724611  | 768987  | 780620  | 888449  | 63.73%   |
| 5-19                    | 522055  | 514867  | 545227  | 586634  | 747137  | 710344  | 745759  | 776316  | 903245  | 1009845 | 1190903 | 128.12%  |
| 20-44                   | 793956  | 788866  | 824338  | 878460  | 1010731 | 1054531 | 1098763 | 1159400 | 1216910 | 1860400 | 2327443 | 193.15%  |
| 45-64                   | 402904  | 413617  | 441945  | 484342  | 532408  | 557115  | 590926  | 625197  | 658112  | 1115845 | 1337561 | 231.98%  |
| 65+                     | 69469   | 67046   | 70278   | 74993   | 76290   | 78773   | 76248   | 77428   | 82192   | 91291   | 105600  | 52.01%   |
| <b>Sex</b>              |         |         |         |         |         |         |         |         |         |         |         |          |
| Male                    | 957166  | 949817  | 1012699 | 1085992 | 1281902 | 1274150 | 1320155 | 1376332 | 1501034 | 2129754 | 2598751 | 171.50%  |
| Female                  | 1371554 | 1379005 | 1462442 | 1566587 | 1832524 | 1843597 | 1909759 | 1986582 | 2128339 | 2728127 | 3251043 | 137.03%  |
| <b>Race/Ethnicity</b>   |         |         |         |         |         |         |         |         |         |         |         |          |
| NH White                | 731384  | 719852  | 754567  | 794179  | 895803  | 906345  | 922269  | 941378  | 960099  | 1382263 | 1669637 | 128.28%  |
| NH Black                | 308077  | 319736  | 342370  | 377544  | 432888  | 438186  | 457551  | 482857  | 508968  | 680050  | 772846  | 150.86%  |
| Hispanic                | 1048204 | 1060758 | 1151617 | 1254527 | 1534361 | 1511196 | 1590293 | 1676984 | 1866746 | 2389237 | 2903001 | 176.95%  |
| Other                   | 181239  | 181922  | 188889  | 188165  | 218784  | 232492  | 232486  | 235241  | 257996  | 360311  | 464135  | 156.09%  |
| Unknown                 | 62094   | 46680   | 37828   | 38228   | 32669   | 29596   | 27353   | 26492   | 35637   | 46140   | 40337   | -35.04%  |

NH, non-Hispanic.

**Supplementary Table 3. California emergency department visits, 2005-2015 – privately insured**

|                         | 2005    | 2006    | 2007    | 2008    | 2009    | 2010    | 2011    | 2012    | 2013    | 2014    | 2015    | % Change |
|-------------------------|---------|---------|---------|---------|---------|---------|---------|---------|---------|---------|---------|----------|
| <b>Age group, years</b> |         |         |         |         |         |         |         |         |         |         |         |          |
| <5                      | 429459  | 408964  | 425124  | 430059  | 459516  | 418544  | 410245  | 391188  | 361352  | 340709  | 323370  | -24.70%  |
| 5-19                    | 708116  | 687035  | 692650  | 705363  | 793381  | 711824  | 723207  | 711686  | 669511  | 657252  | 638977  | -9.76%   |
| 20-44                   | 1346838 | 1326662 | 1345311 | 1351430 | 1363911 | 1281028 | 1337662 | 1387663 | 1362165 | 1460033 | 1466015 | 8.85%    |
| 45-64                   | 937683  | 950346  | 983027  | 1011740 | 1036109 | 1016319 | 1034170 | 1078507 | 1056692 | 1130772 | 1157000 | 23.39%   |
| 65+                     | 146085  | 151071  | 161534  | 172539  | 178683  | 169115  | 176849  | 180333  | 186060  | 192316  | 203422  | 39.25%   |
| <b>Sex</b>              |         |         |         |         |         |         |         |         |         |         |         |          |
| Male                    | 1663208 | 1644771 | 1683651 | 1703166 | 1770583 | 1651551 | 1690084 | 1709483 | 1652877 | 1712209 | 1737064 | 4.44%    |
| Female                  | 1900535 | 1878899 | 1923691 | 1967771 | 2060874 | 1945181 | 1991951 | 2039774 | 1982812 | 2068747 | 2051590 | 7.95%    |
| <b>Race/Ethnicity</b>   |         |         |         |         |         |         |         |         |         |         |         |          |
| NH White                | 1735384 | 1764498 | 1829347 | 1838610 | 1889460 | 1763218 | 1787345 | 1804017 | 1742043 | 1764406 | 1728905 | -0.37%   |
| NH Black                | 259335  | 274790  | 290607  | 294616  | 314387  | 301938  | 312298  | 322555  | 305612  | 308854  | 303153  | 16.90%   |
| Hispanic                | 819647  | 859756  | 926181  | 981879  | 1087422 | 1016798 | 1064338 | 1094322 | 1066446 | 1144353 | 1166619 | 42.33%   |
| Other                   | 330650  | 366942  | 401212  | 413098  | 446058  | 433656  | 447306  | 456385  | 449984  | 479157  | 506248  | 53.11%   |
| Unknown                 | 423165  | 258092  | 160299  | 142928  | 94273   | 81220   | 70846   | 72098   | 71695   | 84312   | 83859   | -80.18%  |

NH, non-Hispanic.

**Supplementary Table 4. Emergency department visits, 2005-2015 – Medicare insured**

|                         | 2005    | 2006    | 2007    | 2008    | 2009    | 2010    | 2011    | 2012    | 2013    | 2014    | 2015    | % Change |
|-------------------------|---------|---------|---------|---------|---------|---------|---------|---------|---------|---------|---------|----------|
| <b>Age group, years</b> |         |         |         |         |         |         |         |         |         |         |         |          |
| <5                      | 8243    | 4200    | 5373    | 6251    | 5090    | 10439   | 10503   | 11613   | 13680   | 14754   | 12550   | 52.25%   |
| 5-19                    | 10797   | 6279    | 6593    | 8337    | 7945    | 12708   | 14009   | 16263   | 19637   | 22658   | 21148   | 95.87%   |
| 20-44                   | 143152  | 140675  | 148033  | 160620  | 167879  | 179749  | 188514  | 205036  | 206723  | 215200  | 212123  | 48.18%   |
| 45-64                   | 275977  | 295922  | 318067  | 346547  | 370181  | 393129  | 420238  | 459603  | 477958  | 505885  | 522212  | 89.22%   |
| 65+                     | 1463280 | 1514311 | 1543433 | 1614298 | 1662697 | 1733959 | 1836846 | 1950094 | 2010516 | 2080691 | 2234793 | 52.72%   |
| <b>Sex</b>              |         |         |         |         |         |         |         |         |         |         |         |          |
| Male                    | 821355  | 844714  | 867868  | 917990  | 950000  | 1006743 | 1066235 | 1142955 | 1189472 | 1240239 | 1318555 | 60.53%   |
| Female                  | 1077719 | 1116566 | 1153548 | 1218014 | 1263757 | 1323213 | 1403845 | 1499617 | 1538996 | 1598904 | 1684217 | 56.28%   |
| <b>Race/Ethnicity</b>   |         |         |         |         |         |         |         |         |         |         |         |          |
| NH White                | 1222354 | 1258172 | 1299775 | 1346473 | 1382103 | 1441869 | 1510711 | 1599925 | 1624635 | 1663996 | 1742676 | 42.57%   |
| NH Black                | 159263  | 170620  | 181588  | 198505  | 211765  | 224865  | 238157  | 257281  | 264718  | 277381  | 290440  | 82.37%   |
| Hispanic                | 297507  | 315033  | 334522  | 371907  | 399036  | 431504  | 469415  | 517413  | 549923  | 583293  | 626736  | 110.66%  |
| Other                   | 156948  | 164791  | 176161  | 190060  | 197222  | 212005  | 231632  | 249920  | 268873  | 285875  | 315090  | 100.76%  |
| Unknown                 | 65377   | 52771   | 29453   | 29108   | 23666   | 19741   | 20195   | 18070   | 20365   | 28643   | 27884   | -57.35%  |

NH, non-Hispanic.

**Supplementary Table 5. Emergency department visits 2005-2015 – uninsured**

|                         | 2005   | 2006   | 2007   | 2008   | 2009   | 2010    | 2011    | 2012    | 2013    | 2014   | 2015   | % Change |
|-------------------------|--------|--------|--------|--------|--------|---------|---------|---------|---------|--------|--------|----------|
| <b>Age group, years</b> |        |        |        |        |        |         |         |         |         |        |        |          |
| <5                      | 115388 | 120322 | 125362 | 114960 | 120588 | 107766  | 107416  | 105162  | 106741  | 101823 | 95770  | -17.00%  |
| 5-19                    | 199444 | 209014 | 216387 | 206858 | 222832 | 199173  | 194820  | 189107  | 189898  | 165966 | 143520 | -28.04%  |
| 20-44                   | 848935 | 887578 | 913148 | 931697 | 996065 | 1015494 | 1030280 | 1055437 | 1072956 | 777655 | 587183 | -30.83%  |
| 45-64                   | 346667 | 368433 | 385732 | 411485 | 451282 | 483683  | 515769  | 509668  | 504880  | 303459 | 227679 | -34.32%  |
| 65+                     | 58608  | 35835  | 36921  | 32604  | 32677  | 32770   | 33913   | 33369   | 35478   | 37552  | 39581  | -32.46%  |
| <b>Sex</b>              |        |        |        |        |        |         |         |         |         |        |        |          |
| Male                    | 859641 | 890163 | 912620 | 922018 | 984241 | 994896  | 1018562 | 1026193 | 1028873 | 748368 | 603828 | -29.76%  |
| Female                  | 705696 | 730669 | 764579 | 775460 | 839104 | 843907  | 863567  | 866453  | 880913  | 637901 | 489743 | -30.60%  |
| <b>Race/Ethnicity</b>   |        |        |        |        |        |         |         |         |         |        |        |          |
| NH White                | 593788 | 617404 | 649223 | 648562 | 697406 | 709652  | 710073  | 713594  | 695377  | 459614 | 335463 | -43.50%  |
| NH Black                | 178541 | 196121 | 209552 | 221673 | 242739 | 252220  | 260977  | 257628  | 244939  | 171578 | 137722 | -22.86%  |
| Hispanic                | 584084 | 626675 | 646508 | 659205 | 719615 | 712070  | 742101  | 745133  | 795756  | 610154 | 490429 | -16.03%  |
| Other                   | 112259 | 119253 | 125578 | 125144 | 135331 | 141106  | 145983  | 148282  | 146588  | 120039 | 105257 | -6.24%   |
| Unknown                 | 100370 | 61729  | 46689  | 43020  | 28353  | 23838   | 23064   | 28106   | 27293   | 25070  | 24862  | -75.23%  |

NH, non-Hispanic.
